# Supplementary material for: Variation block-based genomics method for crop plants
Source: PubMed Central journal article supplement (PMC4229737; doi:10.1186/1471-2164-15-477), 2014-06-15
Supplement: 1471-2164-15-477-S2.pdf [file 1471-2164-15-477-S2.pdf]

**Table S1 - Statistics of short-read sequencing analysis results of six cultivated soybean plants.**

| Sample Name       | Summary of sequencing and mapping |                         |                  |                      |              |                        |                        |
|-------------------|-----------------------------------|-------------------------|------------------|----------------------|--------------|------------------------|------------------------|
|                   | total base (Gb)                   | sequencing depth (fold) | mapped base (Gb) | mapping depth (fold) | mapping rate | mapping coverage (>=1) | mapping coverage (>=5) |
| Williams 82 (W82) | 58.22                             | 60.18                   | 57.62            | 59.56                | 98.9%        | 98.5%                  | 98.3%                  |
| Baekun (BU)       | 58.96                             | 60.94                   | 56.04            | 57.92                | 95.1%        | 97.0%                  | 96.2%                  |
| Sinpaldal2 (SPD2) | 58.6                              | 60.57                   | 57.82            | 59.76                | 98.7%        | 97.7%                  | 97.1%                  |
| Shingi (SG)       | 59.53                             | 61.53                   | 55.78            | 57.65                | 93.7%        | 97.5%                  | 96.8%                  |
| Daepoong (DP)     | 40.32                             | 41.67                   | 38.97            | 40.28                | 96.7%        | 96.9%                  | 93.6%                  |
| Hwanggeum (HK)    | 44.29                             | 45.78                   | 42.19            | 43.61                | 95.3%        | 97.3%                  | 94.7%                  |
