# Supplementary material for: Variation block-based genomics method for crop plants
Source: PubMed Central journal article supplement (PMC4229737; doi:10.1186/1471-2164-15-477), 2014-06-15
Supplement: 1471-2164-15-477-S3.pdf [file 1471-2164-15-477-S3.pdf]

**Table S2 - Statistics of SNVs and indels of six cultivated soybean plants.**

| Sample Name       | Summary of variation |               |               |                 |
|-------------------|----------------------|---------------|---------------|-----------------|
|                   | homo<br>SNV          | hetero<br>SNV | homo<br>indel | hetero<br>indel |
| Williams 82 (W82) | 86,172               | 103,149       | 35,903        | 22,397          |
| Baekun (BU)       | 1,566,469            | 221,955       | 307,116       | 41,526          |
| Sinpaldal2 (SPD2) | 988,173              | 175,198       | 194,711       | 31,104          |
| Shingi (SG)       | 1,188,325            | 195,693       | 239,875       | 33,835          |
| Daepoong (DP)     | 1,202,056            | 248,111       | 198,126       | 31,544          |
| Hwanggeum (HK)    | 1,082,204            | 487,530       | 202,012       | 66,223          |
