# Supplementary material for: Variation block-based genomics method for crop plants
Source: PubMed Central journal article supplement (PMC4229737; doi:10.1186/1471-2164-15-477), 2014-06-15
Supplement: 1471-2164-15-477-S5.pdf [file 1471-2164-15-477-S5.pdf]

Table S3 - List of soybean VBs.

VB types were named by the initial of cultivar that has unique VB type, in the order of Williams 82 (W82), Baekun (BU), Sinpadal2 (SPD2), Shingi (SG), Daepoong (DP), Hwangkeum (HK), and G. soja.

| VB ID      | Chromosome | Start position | End position | Length   | Gene No. | VB type |        |          |        |        |        |            | SNV No. |      |      |      |      |       |        |
|------------|------------|----------------|--------------|----------|----------|---------|--------|----------|--------|--------|--------|------------|---------|------|------|------|------|-------|--------|
|            |            |                |              |          |          | W82 (W) | BU (B) | SPD2 (S) | SG (G) | DP (D) | HK (H) | G.soja (I) | W82     | BU   | SPD2 | SG   | DP   | HK    | G.soja |
| Gm01.VB.1  | Gm01       | 0              | 280000       | 280000   | 13       | W       | W      | W        | W      | W      | W      | I          | 20      | 19   | 21   | 15   | 24   | 25    | 681    |
| Gm01.VB.2  | Gm01       | 280000         | 350000       | 70000    | 11       | W       | W      | W        | W      | W      | H      | I          | 1       | 1    | 1    | 1    | 1    | 113   | 200    |
| Gm01.VB.3  | Gm01       | 350000         | 560000       | 210000   | 29       | W       | W      | W        | W      | W      | W      | I          | 6       | 9    | 6    | 7    | 7    | 8     | 642    |
| Gm01.VB.4  | Gm01       | 560000         | 590000       | 30000    | 5        | W       | W      | W        | W      | W      | H      | I          | 0       | 0    | 0    | 0    | 0    | 49    | 104    |
| Gm01.VB.5  | Gm01       | 590000         | 700000       | 110000   | 9        | W       | W      | W        | W      | W      | W      | I          | 1       | 1    | 2    | 2    | 1    | 6     | 249    |
| Gm01.VB.6  | Gm01       | 700000         | 940000       | 240000   | 24       | W       | W      | W        | W      | W      | H      | I          | 38      | 38   | 38   | 29   | 32   | 341   | 520    |
| Gm01.VB.7  | Gm01       | 940000         | 960000       | 20000    | 1        | W       | B      | W        | W      | B      | H      | I          | 0       | 73   | 0    | 0    | 72   | 72    | 35     |
| Gm01.VB.8  | Gm01       | 960000         | 1020000      | 60000    | 7        | W       | W      | W        | W      | W      | H      | I          | 1       | 2    | 1    | 1    | 2    | 182   | 132    |
| Gm01.VB.9  | Gm01       | 1020000        | 1260000      | 240000   | 24       | W       | W      | W        | W      | W      | W      | I          | 26      | 34   | 21   | 26   | 29   | 32    | 352    |
| Gm01.VB.10 | Gm01       | 1260000        | 1270000      | 10000    | 0        | W       | B      | W        | W      | B      | W      | I          | 2       | 36   | 2    | 2    | 32   | 2     | 20     |
| Gm01.VB.11 | Gm01       | 1270000        | 1760000      | 490000   | 43       | W       | B      | W        | W      | B      | H      | I          | 62      | 1432 | 66   | 55   | 1353 | 1126  | 971    |
| Gm01.VB.12 | Gm01       | 1760000        | 1900000      | 140000   | 10       | W       | B      | W        | W      | B      | W      | I          | 3       | 398  | 3    | 3    | 354  | 5     | 269    |
| Gm01.VB.13 | Gm01       | 1900000        | 2050000      | 150000   | 12       | W       | W      | W        | W      | W      | W      | I          | 4       | 8    | 4    | 3    | 8    | 10    | 311    |
| Gm01.VB.14 | Gm01       | 2050000        | 2190000      | 140000   | 12       | W       | W      | W        | W      | W      | H      | I          | 12      | 20   | 12   | 11   | 16   | 614   | 490    |
| Gm01.VB.15 | Gm01       | 2190000        | 2360000      | 170000   | 17       | W       | B      | W        | W      | B      | H      | I          | 14      | 925  | 14   | 17   | 854  | 523   | 589    |
| Gm01.VB.16 | Gm01       | 2360000        | 2530000      | 170000   | 10       | W       | W      | W        | W      | W      | H      | I          | 14      | 21   | 13   | 13   | 22   | 92    | 379    |
| Gm01.VB.17 | Gm01       | 2530000        | 2560000      | 30000    | 3        | W       | B      | W        | W      | B      | H      | I          | 0       | 96   | 0    | 0    | 91   | 115   | 61     |
| Gm01.VB.18 | Gm01       | 2560000        | 2670000      | 110000   | 4        | W       | B      | W        | W      | D      | W      | I          | 18      | 185  | 18   | 18   | 139  | 19    | 333    |
| Gm01.VB.19 | Gm01       | 2670000        | 2710000      | 40000    | 3        | W       | B      | W        | W      | B      | H      | I          | 0       | 177  | 1    | 1    | 169  | 228   | 97     |
| Gm01.VB.20 | Gm01       | 2710000        | 2870000      | 160000   | 15       | W       | W      | W        | W      | W      | H      | I          | 12      | 13   | 12   | 11   | 10   | 973   | 444    |
| Gm01.VB.21 | Gm01       | 2870000        | 3000000      | 130000   | 10       | W       | W      | W        | W      | W      | W      | I          | 14      | 20   | 16   | 13   | 18   | 18    | 353    |
| Gm01.VB.22 | Gm01       | 3000000        | 3030000      | 30000    | 2        | W       | B      | W        | W      | B      | H      | I          | 0       | 190  | 0    | 0    | 177  | 207   | 106    |
| Gm01.VB.23 | Gm01       | 3030000        | 3040000      | 10000    | 1        | W       | B      | W        | W      | W      | W      | I          | 0       | 5    | 0    | 0    | 4    | 1     | 17     |
| Gm01.VB.24 | Gm01       | 3040000        | 3270000      | 230000   | 22       | W       | W      | W        | W      | W      | W      | I          | 3       | 12   | 3    | 3    | 12   | 47    | 782    |
| Gm01.VB.25 | Gm01       | 3270000        | 3330000      | 60000    | 2        | W       | B      | W        | W      | D      | H      | I          | 4       | 554  | 7    | 4    | 469  | 89    | 187    |
| Gm01.VB.26 | Gm01       | 3330000        | 3390000      | 60000    | 5        | W       | B      | W        | W      | W      | H      | I          | 5       | 479  | 5    | 4    | 6    | 74    | 192    |
| Gm01.VB.27 | Gm01       | 3390000        | 3490000      | 100000   | 5        | W       | B      | W        | W      | W      | W      | I          | 31      | 437  | 36   | 17   | 18   | 25    | 216    |
| Gm01.VB.28 | Gm01       | 3490000        | 4120000      | 630000   | 43       | W       | B      | W        | W      | W      | H      | I          | 54      | 3367 | 54   | 53   | 39   | 1002  | 2393   |
| Gm01.VB.29 | Gm01       | 4120000        | 4660000      | 540000   | 36       | W       | W      | W        | W      | W      | H      | I          | 10      | 10   | 10   | 10   | 8    | 1591  | 2626   |
| Gm01.VB.30 | Gm01       | 4660000        | 4850000      | 190000   | 12       | W       | W      | W        | W      | W      | W      | I          | 1       | 2    | 1    | 2    | 1    | 14    | 617    |
| Gm01.VB.31 | Gm01       | 4850000        | 5340000      | 490000   | 20       | W       | W      | W        | W      | W      | H      | I          | 70      | 67   | 72   | 54   | 56   | 1616  | 1350   |
| Gm01.VB.32 | Gm01       | 5340000        | 5450000      | 110000   | 6        | W       | W      | W        | W      | W      | W      | I          | 1       | 1    | 1    | 1    | 1    | 9     | 151    |
| Gm01.VB.33 | Gm01       | 5450000        | 5570000      | 120000   | 5        | W       | W      | W        | W      | W      | H      | I          | 5       | 5    | 6    | 5    | 1    | 1149  | 584    |
| Gm01.VB.34 | Gm01       | 5570000        | 10760000     | 5190000  | 133      | W       | W      | W        | W      | W      | W      | I          | 249     | 240  | 261  | 218  | 194  | 526   | 16455  |
| Gm01.VB.35 | Gm01       | 10760000       | 18390000     | 7630000  | 75       | W       | W      | W        | W      | W      | H      | I          | 412     | 486  | 511  | 355  | 474  | 10969 | 4810   |
| Gm01.VB.36 | Gm01       | 18390000       | 28610000     | 10220000 | 102      | W       | W      | W        | W      | W      | W      | I          | 418     | 367  | 410  | 343  | 332  | 1106  | 8154   |
| Gm01.VB.37 | Gm01       | 28610000       | 28890000     | 280000   | 6        | W       | W      | W        | W      | W      | H      | I          | 6       | 14   | 15   | 7    | 14   | 947   | 1193   |
| Gm01.VB.38 | Gm01       | 28890000       | 29070000     | 180000   | 3        | W       | W      | W        | W      | W      | W      | I          | 7       | 13   | 12   | 6    | 13   | 24    | 101    |
| Gm01.VB.39 | Gm01       | 29070000       | 31910000     | 2840000  | 38       | W       | W      | W        | W      | W      | H      | I          | 144     | 248  | 282  | 116  | 248  | 2756  | 1418   |
| Gm01.VB.40 | Gm01       | 31910000       | 32040000     | 130000   | 4        | W       | W      | W        | W      | W      | W      | I          | 16      | 25   | 27   | 11   | 19   | 22    | 144    |
| Gm01.VB.41 | Gm01       | 32040000       | 32050000     | 10000    | 0        | W       | B      | B        | W      | B      | W      | I          | 0       | 6    | 6    | 0    | 5    | 4     | 9      |
| Gm01.VB.42 | Gm01       | 32050000       | 32930000     | 880000   | 16       | W       | B      | B        | W      | B      | H      | I          | 43      | 5679 | 5741 | 42   | 5678 | 621   | 529    |
| Gm01.VB.43 | Gm01       | 32930000       | 33790000     | 860000   | 8        | W       | W      | W        | W      | W      | H      | I          | 32      | 265  | 280  | 31   | 278  | 666   | 542    |
| Gm01.VB.44 | Gm01       | 33790000       | 33830000     | 40000    | 0        | W       | W      | W        | W      | W      | H      | I          | 0       | 11   | 11   | 0    | 9    | 23    | 20     |
| Gm01.VB.45 | Gm01       | 33830000       | 34300000     | 470000   | 7        | W       | B      | B        | W      | B      | B      | I          | 16      | 1113 | 1126 | 11   | 1082 | 1064  | 697    |
| Gm01.VB.46 | Gm01       | 34300000       | 34330000     | 30000    | 0        | W       | B      | B        | B      | B      | B      | I          | 17      | 236  | 231  | 236  | 213  | 225   | 167    |
| Gm01.VB.47 | Gm01       | 34330000       | 35130000     | 800000   | 11       | W       | W      | W        | G      | W      | G      | I          | 231     | 251  | 260  | 848  | 256  | 840   | 787    |
| Gm01.VB.48 | Gm01       | 35130000       | 35140000     | 10000    | 1        | W       | W      | W        | W      | W      | W      | W          | 0       | 3    | 3    | 0    | 3    | 0     | 3      |
| Gm01.VB.49 | Gm01       | 35140000       | 35840000     | 700000   | 15       | W       | B      | B        | W      | B      | W      | I          | 57      | 1707 | 1728 | 39   | 1645 | 42    | 2234   |
| Gm01.VB.50 | Gm01       | 35840000       | 36470000     | 630000   | 21       | W       | B      | W        | W      | W      | W      | I          | 38      | 3932 | 135  | 30   | 120  | 29    | 2069   |
| Gm01.VB.51 | Gm01       | 36470000       | 36540000     | 70000    | 0        | W       | B      | W        | W      | W      | W      | I          | 11      | 91   | 24   | 10   | 24   | 10    | 337    |
| Gm01.VB.52 | Gm01       | 36540000       | 38690000     | 2150000  | 32       | W       | B      | S        | W      | S      | W      | I          | 91      | 9362 | 7445 | 88   | 7287 | 83    | 6752   |
| Gm01.VB.53 | Gm01       | 38690000       | 38760000     | 70000    | 3        | W       | B      | S        | B      | S      | W      | I          | 22      | 377  | 423  | 316  | 374  | 19    | 181    |
| Gm01.VB.54 | Gm01       | 38760000       | 39700000     | 940000   | 16       | W       | B      | W        | B      | W      | W      | I          | 48      | 4923 | 173  | 4898 | 149  | 39    | 2598   |
| Gm01.VB.55 | Gm01       | 39700000       | 39790000     | 90000    | 0        | W       | B      | S        | B      | S      | W      | I          | 5       | 122  | 489  | 121  | 478  | 5     | 454    |
| Gm01.VB.56 | Gm01       | 39790000       | 40100000     | 310000   | 11       | W       | B      | W        | B      | W      | W      | I          | 45      | 582  | 90   | 590  | 75   | 34    | 750    |
| Gm01.VB.57 | Gm01       | 40100000       | 40250000     | 150000   | 0        | W       | B      | S        | B      | S      | W      | I          | 9       | 76   | 506  | 77   | 484  | 5     | 337    |
| Gm01.VB.58 | Gm01       | 40250000       | 40370000     | 120000   | 0        | W       | W      | S        | W      | S      | W      | I          | 0       | 14   | 280  | 8    | 282  | 0     | 194    |
| Gm01.VB.59 | Gm01       | 40370000       | 40400000     | 30000    | 0        | W       | W      | S        | W      | S      | W      | I          | 0       | 7    | 120  | 3    | 120  | 0     | 119    |
| Gm01.VB.60 | Gm01       | 40400000       | 42130000     | 1730000  | 32       | W       | B      | S        | B      | S      | W      | I          | 71      | 3711 | 5446 | 3618 | 5358 | 51    | 4866   |
| Gm01.VB.61 | Gm01       | 42130000       | 43140000     | 1010000  | 28       | W       | W      | S        | W      | S      | W      | I          | 34      | 74   | 5464 | 78   | 5236 | 39    | 3244   |
| Gm01.VB.62 | Gm01       | 43140000       | 43180000     | 40000    | 4        | W       | B      | S        | B      | D      | W      | I          | 5       | 209  | 250  | 200  | 204  | 4     | 172    |
| Gm01.VB.63 | Gm01       | 43180000       | 43290000     | 110000   | 4        | W       | W      | S        | W      | S      | W      | I          | 5       | 14   | 626  | 13   | 585  | 5     | 399    |
| Gm01.VB.64 | Gm01       | 43290000       | 44400000     | 1110000  | 33       | W       | B      | B        | B      | B      | W      | I          | 72      | 7243 | 7390 | 7128 | 6986 | 71    | 5973   |
| Gm01.VB.65 | Gm01       | 44400000       | 44570000     | 170000   | 6        | W       | W      | S        | W      | S      | W      | I          | 3       | 10   | 997  | 10   | 938  | 3     | 391    |
| Gm01.VB.66 | Gm01       | 44570000       | 44710000     | 140000   | 2        | W       | W      | W        | W      | W      | W      | I          | 18      | 22   | 18   | 19   | 19   | 20    | 193    |
| Gm01.VB.67 | Gm01       | 44710000       | 44760000     | 50000    | 1        | W       | B      | B        | B      | B      | W      | I          | 1       | 156  | 155  | 155  | 154  | 1     | 182    |
| Gm01.VB.68 | Gm01       | 44760000       | 45180000     | 420000   | 11       | W       | B      | B        | B      | B      | B      | I          | 23      | 782  | 806  | 774  | 802  | 802   | 653    |
| Gm01.VB.69 | Gm01       | 45180000       | 45570000     | 390000   | 10       | W       | W      | W        | W      | W      | W      | I          | 8       | 36   | 36   | 39   | 33   | 33    | 1368   |
| Gm01.VB.70 | Gm01       | 45570000       | 45810000     | 240000   | 11       | W       | B      | B        | B      | B      | B      | I          | 35      | 134  | 138  | 133  | 130  | 132   | 1005   |

|             |      |          |          |         |     |   |   |   |   |   |   |   |    |      |      |      |      |      |      |
|-------------|------|----------|----------|---------|-----|---|---|---|---|---|---|---|----|------|------|------|------|------|------|
| Gm01.VB.71  | Gm01 | 45810000 | 46530000 | 720000  | 20  | W | W | W | W | W | H | I | 40 | 100  | 104  | 94   | 91   | 1583 | 1858 |
| Gm01.VB.72  | Gm01 | 46530000 | 46780000 | 250000  | 11  | W | B | B | B | B | H | I | 4  | 473  | 485  | 472  | 475  | 137  | 1239 |
| Gm01.VB.73  | Gm01 | 46780000 | 46950000 | 170000  | 8   | W | W | W | W | W | W | I | 20 | 27   | 29   | 25   | 33   | 39   | 613  |
| Gm01.VB.74  | Gm01 | 46950000 | 47020000 | 70000   | 2   | W | W | W | W | W | W | I | 41 | 45   | 46   | 43   | 34   | 39   | 214  |
| Gm01.VB.75  | Gm01 | 47020000 | 47370000 | 350000  | 15  | W | B | B | B | B | H | I | 40 | 1463 | 1519 | 1481 | 1406 | 1802 | 1023 |
| Gm01.VB.76  | Gm01 | 47370000 | 47560000 | 190000  | 10  | W | W | W | W | W | H | I | 10 | 30   | 28   | 28   | 25   | 467  | 251  |
| Gm01.VB.77  | Gm01 | 47560000 | 47710000 | 150000  | 10  | W | W | W | W | W | W | I | 0  | 19   | 19   | 19   | 16   | 3    | 468  |
| Gm01.VB.78  | Gm01 | 47710000 | 47760000 | 50000   | 3   | W | B | B | B | D | W | I | 0  | 43   | 44   | 42   | 37   | 0    | 83   |
| Gm01.VB.79  | Gm01 | 47760000 | 47910000 | 150000  | 14  | W | B | W | B | W | W | I | 5  | 854  | 9    | 850  | 9    | 8    | 740  |
| Gm01.VB.80  | Gm01 | 47910000 | 47980000 | 70000   | 9   | W | B | W | B | W | H | I | 5  | 393  | 7    | 377  | 7    | 274  | 203  |
| Gm01.VB.81  | Gm01 | 47980000 | 48270000 | 290000  | 20  | W | B | W | B | W | W | I | 43 | 1744 | 42   | 1685 | 34   | 49   | 747  |
| Gm01.VB.82  | Gm01 | 48270000 | 48550000 | 280000  | 21  | W | B | W | B | W | H | I | 1  | 1611 | 1    | 1486 | 1    | 801  | 918  |
| Gm01.VB.83  | Gm01 | 48550000 | 48880000 | 330000  | 26  | W | W | W | W | W | W | I | 19 | 31   | 21   | 32   | 8    | 14   | 1336 |
| Gm01.VB.84  | Gm01 | 48880000 | 49060000 | 180000  | 18  | W | W | W | W | W | H | I | 18 | 20   | 20   | 21   | 16   | 332  | 398  |
| Gm01.VB.85  | Gm01 | 49060000 | 49420000 | 360000  | 39  | W | B | W | B | W | H | I | 29 | 1044 | 32   | 1042 | 29   | 1301 | 961  |
| Gm01.VB.86  | Gm01 | 49420000 | 49590000 | 170000  | 12  | W | W | W | W | W | H | I | 2  | 15   | 2    | 15   | 2    | 1080 | 677  |
| Gm01.VB.87  | Gm01 | 49590000 | 49670000 | 80000   | 8   | W | W | W | W | W | W | I | 25 | 32   | 24   | 30   | 20   | 24   | 300  |
| Gm01.VB.88  | Gm01 | 49670000 | 49930000 | 260000  | 23  | W | B | W | B | W | W | I | 10 | 765  | 13   | 753  | 11   | 17   | 694  |
| Gm01.VB.89  | Gm01 | 49930000 | 50340000 | 410000  | 44  | W | B | W | B | W | H | I | 15 | 1334 | 23   | 1285 | 14   | 960  | 901  |
| Gm01.VB.90  | Gm01 | 50340000 | 50500000 | 160000  | 17  | W | B | W | B | W | W | I | 12 | 110  | 11   | 108  | 8    | 13   | 200  |
| Gm01.VB.91  | Gm01 | 50500000 | 50610000 | 110000  | 13  | W | B | W | B | W | B | I | 3  | 193  | 1    | 195  | 1    | 172  | 313  |
| Gm01.VB.92  | Gm01 | 50610000 | 50730000 | 120000  | 11  | W | W | W | W | W | H | I | 3  | 10   | 4    | 9    | 1    | 201  | 164  |
| Gm01.VB.93  | Gm01 | 50730000 | 51310000 | 580000  | 60  | W | W | W | W | W | W | I | 18 | 36   | 19   | 35   | 17   | 28   | 1423 |
| Gm01.VB.94  | Gm01 | 51310000 | 51500000 | 190000  | 18  | W | B | W | B | W | W | I | 18 | 647  | 20   | 642  | 20   | 17   | 483  |
| Gm01.VB.95  | Gm01 | 51500000 | 51610000 | 110000  | 14  | W | W | W | W | W | W | I | 2  | 18   | 3    | 16   | 3    | 5    | 274  |
| Gm01.VB.96  | Gm01 | 51610000 | 51940000 | 330000  | 32  | W | B | W | B | W | H | I | 16 | 1336 | 17   | 1313 | 21   | 1531 | 1083 |
| Gm01.VB.97  | Gm01 | 51940000 | 51970000 | 30000   | 5   | W | W | W | W | W | H | I | 3  | 3    | 3    | 3    | 3    | 82   | 53   |
| Gm01.VB.98  | Gm01 | 51970000 | 52100000 | 130000  | 16  | W | W | W | W | W | W | I | 1  | 13   | 1    | 13   | 1    | 4    | 247  |
| Gm01.VB.99  | Gm01 | 52100000 | 52150000 | 50000   | 3   | W | W | W | W | W | W | I | 2  | 17   | 2    | 17   | 2    | 5    | 96   |
| Gm01.VB.100 | Gm01 | 52150000 | 52200000 | 50000   | 3   | W | B | W | B | W | B | I | 9  | 154  | 9    | 159  | 7    | 140  | 97   |
| Gm01.VB.101 | Gm01 | 52200000 | 52530000 | 330000  | 34  | W | W | W | W | W | W | I | 24 | 34   | 25   | 34   | 17   | 25   | 876  |
| Gm01.VB.102 | Gm01 | 52530000 | 52850000 | 320000  | 36  | W | B | W | B | W | W | I | 30 | 989  | 33   | 980  | 29   | 41   | 756  |
| Gm01.VB.103 | Gm01 | 52850000 | 52910000 | 60000   | 8   | W | B | W | B | W | H | I | 0  | 256  | 0    | 248  | 0    | 190  | 96   |
| Gm01.VB.104 | Gm01 | 52910000 | 53570000 | 660000  | 77  | W | W | W | W | W | W | I | 23 | 56   | 24   | 49   | 20   | 22   | 1491 |
| Gm01.VB.105 | Gm01 | 53570000 | 53730000 | 160000  | 20  | W | B | W | B | W | W | I | 2  | 615  | 2    | 615  | 2    | 2    | 375  |
| Gm01.VB.106 | Gm01 | 53730000 | 54620000 | 890000  | 103 | W | B | B | B | B | W | I | 68 | 3701 | 3571 | 3646 | 3235 | 59   | 1782 |
| Gm01.VB.107 | Gm01 | 54620000 | 54990000 | 370000  | 57  | W | W | S | W | W | W | I | 7  | 21   | 872  | 18   | 23   | 7    | 666  |
| Gm01.VB.108 | Gm01 | 54990000 | 55000000 | 10000   | 1   | W | B | B | B | D | W | I | 0  | 21   | 21   | 21   | 14   | 0    | 19   |
| Gm01.VB.109 | Gm01 | 55000000 | 55250000 | 250000  | 32  | W | W | W | W | W | W | I | 6  | 17   | 18   | 17   | 15   | 5    | 525  |
| Gm01.VB.110 | Gm01 | 55250000 | 55340000 | 90000   | 13  | W | W | S | W | W | W | I | 13 | 17   | 395  | 17   | 17   | 13   | 188  |
| Gm01.VB.111 | Gm01 | 55340000 | 55650000 | 310000  | 39  | W | B | B | B | B | W | I | 9  | 1061 | 1040 | 1045 | 981  | 9    | 708  |
| Gm01.VB.112 | Gm01 | 55650000 | 55915595 | 265595  | 33  | W | B | S | B | B | B | I | 3  | 833  | 881  | 823  | 773  | 792  | 467  |
| Gm02.VB.1   | Gm02 | 0        | 210000   | 210000  | 18  | W | B | W | B | B | W | I | 16 | 552  | 16   | 534  | 532  | 29   | 265  |
| Gm02.VB.2   | Gm02 | 210000   | 510000   | 300000  | 23  | W | B | W | B | B | H | I | 7  | 1186 | 7    | 1076 | 1039 | 1086 | 842  |
| Gm02.VB.3   | Gm02 | 510000   | 670000   | 160000  | 13  | W | W | W | W | W | H | I | 13 | 24   | 13   | 25   | 18   | 684  | 386  |
| Gm02.VB.4   | Gm02 | 670000   | 720000   | 50000   | 7   | W | B | W | B | B | H | I | 9  | 269  | 9    | 271  | 228  | 200  | 92   |
| Gm02.VB.5   | Gm02 | 720000   | 770000   | 50000   | 6   | W | W | W | W | W | H | I | 2  | 3    | 2    | 3    | 3    | 130  | 111  |
| Gm02.VB.6   | Gm02 | 770000   | 1330000  | 560000  | 69  | W | W | W | W | W | W | I | 17 | 27   | 17   | 28   | 13   | 34   | 1248 |
| Gm02.VB.7   | Gm02 | 1330000  | 1440000  | 110000  | 11  | W | B | W | B | W | H | I | 12 | 123  | 20   | 117  | 19   | 328  | 229  |
| Gm02.VB.8   | Gm02 | 1440000  | 1560000  | 120000  | 16  | W | W | W | W | W | H | I | 10 | 19   | 19   | 19   | 19   | 611  | 371  |
| Gm02.VB.9   | Gm02 | 1560000  | 1810000  | 250000  | 20  | W | W | W | W | W | W | I | 22 | 22   | 32   | 24   | 27   | 22   | 330  |
| Gm02.VB.10  | Gm02 | 1810000  | 1890000  | 80000   | 9   | W | W | S | W | S | W | I | 2  | 2    | 306  | 2    | 269  | 1    | 207  |
| Gm02.VB.11  | Gm02 | 1890000  | 1900000  | 10000   | 2   | W | W | S | W | W | W | I | 0  | 0    | 5    | 0    | 4    | 0    | 9    |
| Gm02.VB.12  | Gm02 | 1900000  | 2120000  | 220000  | 18  | W | W | W | W | W | W | I | 21 | 28   | 39   | 30   | 33   | 26   | 351  |
| Gm02.VB.13  | Gm02 | 2120000  | 2400000  | 280000  | 24  | W | B | B | B | B | B | I | 18 | 1004 | 896  | 1003 | 825  | 851  | 695  |
| Gm02.VB.14  | Gm02 | 2400000  | 2560000  | 160000  | 16  | W | B | S | B | D | W | I | 12 | 450  | 448  | 413  | 409  | 19   | 376  |
| Gm02.VB.15  | Gm02 | 2560000  | 2870000  | 310000  | 23  | W | W | S | W | S | W | I | 20 | 35   | 1491 | 34   | 1276 | 61   | 720  |
| Gm02.VB.16  | Gm02 | 2870000  | 2950000  | 80000   | 6   | W | B | S | B | S | B | I | 5  | 463  | 462  | 460  | 418  | 445  | 230  |
| Gm02.VB.17  | Gm02 | 2950000  | 3220000  | 270000  | 21  | W | B | S | B | S | W | I | 24 | 922  | 983  | 911  | 867  | 24   | 448  |
| Gm02.VB.18  | Gm02 | 3220000  | 3330000  | 110000  | 12  | W | W | S | W | S | W | W | 4  | 10   | 483  | 10   | 431  | 6    | 5    |
| Gm02.VB.19  | Gm02 | 3330000  | 3840000  | 510000  | 46  | W | B | S | B | S | W | I | 40 | 1806 | 2005 | 1776 | 1780 | 39   | 1074 |
| Gm02.VB.20  | Gm02 | 3840000  | 5260000  | 1420000 | 157 | W | B | S | B | S | H | I | 70 | 3640 | 4604 | 3587 | 4070 | 3746 | 2343 |
| Gm02.VB.21  | Gm02 | 5260000  | 5270000  | 10000   | 0   | W | B | S | G | W | G | W | 5  | 12   | 20   | 12   | 3    | 6    | 0    |
| Gm02.VB.22  | Gm02 | 5270000  | 5370000  | 100000  | 8   | W | W | S | W | W | W | I | 0  | 13   | 296  | 14   | 4    | 10   | 173  |
| Gm02.VB.23  | Gm02 | 5370000  | 5700000  | 330000  | 33  | W | B | S | B | D | H | I | 14 | 1453 | 1380 | 1385 | 895  | 923  | 639  |
| Gm02.VB.24  | Gm02 | 5700000  | 5830000  | 130000  | 17  | W | B | S | B | S | W | I | 11 | 497  | 474  | 490  | 436  | 15   | 252  |
| Gm02.VB.25  | Gm02 | 5830000  | 5840000  | 10000   | 0   | W | B | S | G | S | H | I | 0  | 14   | 26   | 11   | 27   | 24   | 14   |
| Gm02.VB.26  | Gm02 | 5840000  | 5990000  | 150000  | 24  | W | W | S | W | S | H | I | 1  | 4    | 586  | 4    | 529  | 663  | 280  |
| Gm02.VB.27  | Gm02 | 5990000  | 6000000  | 10000   | 1   | W | B | S | B | S | H | I | 0  | 9    | 20   | 9    | 17   | 16   | 8    |
| Gm02.VB.28  | Gm02 | 6000000  | 6030000  | 30000   | 3   | W | B | S | B | S | W | I | 2  | 128  | 145  | 124  | 136  | 2    | 62   |
| Gm02.VB.29  | Gm02 | 6030000  | 6180000  | 150000  | 15  | W | W | S | W | S | W | I | 1  | 14   | 587  | 13   | 538  | 10   | 154  |
| Gm02.VB.30  | Gm02 | 6180000  | 6620000  | 440000  | 49  | W | B | S | B | S | H | I | 7  | 1043 | 1689 | 1035 | 1480 | 934  | 915  |
| Gm02.VB.31  | Gm02 | 6620000  | 6810000  | 190000  | 26  | W | W | S | W | S | H | I | 11 | 17   | 766  | 19   | 726  | 511  | 517  |
| Gm02.VB.32  | Gm02 | 6810000  | 7250000  | 440000  | 32  | W | B | S | B | S | H | I | 60 | 746  | 1619 | 735  | 1478 | 1583 | 854  |
| Gm02.VB.33  | Gm02 | 7250000  | 7350000  | 100000  | 11  | W | W | S | W | S | S | I | 1  | 6    | 463  | 7    | 404  | 408  | 234  |
| Gm02.VB.34  | Gm02 | 7350000  | 7380000  | 30000   | 3   | W | W | S | W | S | S | I | 0  | 8    | 76   | 8    | 71   | 72   | 63   |
| Gm02.VB.35  | Gm02 | 7380000  | 7870000  | 490000  | 40  | W | B | W | B | W | H | I | 23 | 685  | 32   | 668  | 21   | 1358 | 816  |
| Gm02.VB.36  | Gm02 | 7870000  | 8020000  | 150000  | 11  | W | B | W | B | W | W | I | 14 | 762  | 15   | 736  | 5    | 30   | 455  |

|             |      |          |          |         |     |   |   |   |   |   |   |   |     |       |      |       |       |       |       |
|-------------|------|----------|----------|---------|-----|---|---|---|---|---|---|---|-----|-------|------|-------|-------|-------|-------|
| Gm02.VB.37  | Gm02 | 8020000  | 8060000  | 40000   | 4   | W | W | W | W | W | H | I | 0   | 8     | 0    | 8     | 0     | 152   | 131   |
| Gm02.VB.38  | Gm02 | 8060000  | 8340000  | 280000  | 19  | W | B | W | B | W | W | I | 10  | 901   | 9    | 888   | 9     | 32    | 308   |
| Gm02.VB.39  | Gm02 | 8340000  | 8380000  | 40000   | 5   | W | B | W | B | W | H | I | 0   | 107   | 0    | 108   | 0     | 71    | 47    |
| Gm02.VB.40  | Gm02 | 8380000  | 8650000  | 270000  | 21  | W | W | W | W | W | H | I | 5   | 16    | 8    | 16    | 4     | 615   | 819   |
| Gm02.VB.41  | Gm02 | 8650000  | 8740000  | 90000   | 5   | W | W | W | W | W | W | I | 6   | 13    | 11   | 12    | 4     | 6     | 226   |
| Gm02.VB.42  | Gm02 | 8740000  | 10900000 | 2160000 | 136 | W | B | W | B | W | W | I | 212 | 6379  | 215  | 6308  | 151   | 163   | 3947  |
| Gm02.VB.43  | Gm02 | 10900000 | 11060000 | 160000  | 16  | W | W | W | W | W | W | I | 15  | 17    | 16   | 17    | 9     | 11    | 267   |
| Gm02.VB.44  | Gm02 | 11060000 | 11160000 | 100000  | 5   | W | B | W | B | W | W | I | 2   | 100   | 2    | 99    | 2     | 2     | 93    |
| Gm02.VB.45  | Gm02 | 11160000 | 11490000 | 330000  | 27  | W | W | W | W | W | W | I | 41  | 60    | 37   | 51    | 11    | 18    | 499   |
| Gm02.VB.46  | Gm02 | 11490000 | 11640000 | 150000  | 11  | W | B | W | B | W | W | I | 15  | 362   | 15   | 361   | 11    | 14    | 199   |
| Gm02.VB.47  | Gm02 | 11640000 | 11940000 | 300000  | 19  | W | W | W | W | W | W | I | 9   | 25    | 10   | 22    | 9     | 10    | 352   |
| Gm02.VB.48  | Gm02 | 11940000 | 12100000 | 160000  | 11  | W | B | W | B | W | H | I | 5   | 560   | 5    | 542   | 4     | 431   | 258   |
| Gm02.VB.49  | Gm02 | 12100000 | 12250000 | 150000  | 11  | W | B | W | B | W | W | I | 17  | 318   | 17   | 313   | 13    | 14    | 224   |
| Gm02.VB.50  | Gm02 | 12250000 | 13520000 | 1270000 | 62  | W | W | W | W | W | W | I | 169 | 202   | 161  | 200   | 117   | 127   | 2148  |
| Gm02.VB.51  | Gm02 | 13520000 | 13560000 | 40000   | 4   | W | B | W | B | W | W | I | 11  | 123   | 15   | 123   | 11    | 9     | 149   |
| Gm02.VB.52  | Gm02 | 13560000 | 13720000 | 160000  | 17  | W | W | W | W | W | W | I | 8   | 14    | 8    | 14    | 7     | 10    | 366   |
| Gm02.VB.53  | Gm02 | 13720000 | 13940000 | 220000  | 18  | W | B | W | B | W | H | I | 15  | 592   | 16   | 544   | 6     | 288   | 413   |
| Gm02.VB.54  | Gm02 | 13940000 | 14270000 | 330000  | 22  | W | W | W | W | W | W | I | 26  | 37    | 25   | 38    | 21    | 137   | 666   |
| Gm02.VB.55  | Gm02 | 14270000 | 14870000 | 600000  | 58  | W | B | W | B | W | B | I | 28  | 898   | 30   | 881   | 19    | 763   | 851   |
| Gm02.VB.56  | Gm02 | 14870000 | 15310000 | 440000  | 45  | W | W | W | W | W | W | I | 29  | 52    | 31   | 52    | 35    | 63    | 705   |
| Gm02.VB.57  | Gm02 | 15310000 | 15480000 | 170000  | 19  | W | B | W | B | W | B | I | 21  | 356   | 20   | 364   | 11    | 357   | 238   |
| Gm02.VB.58  | Gm02 | 15480000 | 15580000 | 100000  | 9   | W | W | W | W | W | W | I | 25  | 33    | 30   | 26    | 15    | 19    | 218   |
| Gm02.VB.59  | Gm02 | 15580000 | 15610000 | 30000   | 1   | W | B | W | B | B | B | W | 0   | 101   | 0    | 99    | 99    | 96    | 8     |
| Gm02.VB.60  | Gm02 | 15610000 | 15710000 | 100000  | 8   | W | W | W | W | W | W | I | 4   | 11    | 4    | 10    | 7     | 8     | 62    |
| Gm02.VB.61  | Gm02 | 15710000 | 22520000 | 6810000 | 58  | W | B | W | B | B | B | I | 557 | 16532 | 577  | 16323 | 16784 | 16832 | 3404  |
| Gm02.VB.62  | Gm02 | 22520000 | 22940000 | 420000  | 1   | W | B | S | G | D | W | W | 137 | 1273  | 1251 | 1161  | 1270  | 128   | 159   |
| Gm02.VB.63  | Gm02 | 22940000 | 23030000 | 90000   | 0   | W | B | S | G | D | W | W | 38  | 128   | 146  | 124   | 133   | 37    | 44    |
| Gm02.VB.64  | Gm02 | 23030000 | 24340000 | 1310000 | 5   | W | B | W | B | B | B | I | 30  | 2357  | 38   | 2318  | 2367  | 2380  | 587   |
| Gm02.VB.65  | Gm02 | 24340000 | 24450000 | 110000  | 0   | W | W | W | W | W | W | I | 2   | 13    | 1    | 13    | 10    | 18    | 49    |
| Gm02.VB.66  | Gm02 | 24450000 | 24460000 | 10000   | 0   | W | B | W | G | D | H | W | 0   | 10    | 0    | 7     | 11    | 9     | 3     |
| Gm02.VB.67  | Gm02 | 24460000 | 24500000 | 40000   | 0   | W | B | W | W | W | W | I | 0   | 20    | 0    | 1     | 5     | 3     | 36    |
| Gm02.VB.68  | Gm02 | 24500000 | 24750000 | 250000  | 0   | W | W | W | W | W | W | I | 6   | 20    | 5    | 28    | 18    | 7     | 129   |
| Gm02.VB.69  | Gm02 | 24750000 | 24780000 | 30000   | 0   | W | W | W | W | W | W | I | 0   | 7     | 0    | 0     | 0     | 0     | 20    |
| Gm02.VB.70  | Gm02 | 24780000 | 25940000 | 1160000 | 6   | W | B | W | B | B | B | I | 38  | 2344  | 37   | 2306  | 2384  | 2394  | 606   |
| Gm02.VB.71  | Gm02 | 25940000 | 26080000 | 140000  | 8   | W | W | W | W | W | H | I | 36  | 36    | 34   | 32    | 43    | 280   | 413   |
| Gm02.VB.72  | Gm02 | 26080000 | 27560000 | 1480000 | 15  | W | B | W | B | W | H | I | 40  | 2455  | 36   | 2401  | 73    | 2180  | 1317  |
| Gm02.VB.73  | Gm02 | 27560000 | 27770000 | 210000  | 7   | W | W | W | W | W | W | I | 5   | 57    | 5    | 53    | 49    | 50    | 553   |
| Gm02.VB.74  | Gm02 | 27770000 | 31330000 | 3560000 | 58  | W | B | W | B | B | B | I | 262 | 5344  | 250  | 5339  | 5397  | 5442  | 3130  |
| Gm02.VB.75  | Gm02 | 31330000 | 34300000 | 2970000 | 43  | W | W | W | W | W | W | I | 124 | 192   | 133  | 199   | 179   | 174   | 2129  |
| Gm02.VB.76  | Gm02 | 34300000 | 34320000 | 20000   | 1   | W | B | W | B | B | B | B | 0   | 96    | 0    | 95    | 97    | 96    | 83    |
| Gm02.VB.77  | Gm02 | 34320000 | 41970000 | 7650000 | 153 | W | W | W | W | W | W | I | 261 | 362   | 275  | 361   | 384   | 366   | 18266 |
| Gm02.VB.78  | Gm02 | 41970000 | 42210000 | 240000  | 26  | W | B | W | B | B | B | I | 3   | 440   | 2    | 429   | 425   | 444   | 517   |
| Gm02.VB.79  | Gm02 | 42210000 | 42310000 | 100000  | 8   | W | W | W | W | W | W | I | 0   | 6     | 0    | 5     | 5     | 5     | 142   |
| Gm02.VB.80  | Gm02 | 42310000 | 42360000 | 50000   | 7   | W | B | W | B | D | H | I | 3   | 103   | 3    | 103   | 39    | 25    | 49    |
| Gm02.VB.81  | Gm02 | 42360000 | 42600000 | 240000  | 16  | W | B | W | B | W | W | I | 26  | 1063  | 24   | 1061  | 65    | 45    | 676   |
| Gm02.VB.82  | Gm02 | 42600000 | 43140000 | 540000  | 38  | W | B | W | B | D | H | I | 55  | 3403  | 53   | 3320  | 1190  | 830   | 1535  |
| Gm02.VB.83  | Gm02 | 43140000 | 43220000 | 80000   | 9   | W | B | W | B | W | W | I | 11  | 246   | 12   | 248   | 11    | 10    | 113   |
| Gm02.VB.84  | Gm02 | 43220000 | 43610000 | 390000  | 22  | W | W | W | W | W | W | I | 17  | 37    | 17   | 38    | 12    | 29    | 282   |
| Gm02.VB.85  | Gm02 | 43610000 | 43630000 | 20000   | 1   | W | B | W | B | W | W | I | 0   | 10    | 0    | 10    | 0     | 0     | 20    |
| Gm02.VB.86  | Gm02 | 43630000 | 43930000 | 300000  | 21  | W | B | W | B | W | B | I | 32  | 763   | 38   | 765   | 26    | 681   | 1047  |
| Gm02.VB.87  | Gm02 | 43930000 | 44060000 | 130000  | 16  | W | W | W | W | W | H | I | 4   | 7     | 3    | 7     | 6     | 88    | 256   |
| Gm02.VB.88  | Gm02 | 44060000 | 44160000 | 100000  | 7   | W | B | W | B | W | H | I | 0   | 402   | 0    | 401   | 0     | 141   | 279   |
| Gm02.VB.89  | Gm02 | 44160000 | 44240000 | 80000   | 7   | W | W | W | W | W | H | I | 0   | 3     | 0    | 4     | 1     | 50    | 170   |
| Gm02.VB.90  | Gm02 | 44240000 | 44260000 | 20000   | 4   | W | W | W | W | W | W | I | 1   | 6     | 1    | 5     | 1     | 3     | 45    |
| Gm02.VB.91  | Gm02 | 44260000 | 44420000 | 160000  | 19  | W | B | W | B | W | W | I | 11  | 836   | 12   | 837   | 12    | 14    | 513   |
| Gm02.VB.92  | Gm02 | 44420000 | 44530000 | 110000  | 11  | W | B | W | B | W | H | I | 3   | 433   | 3    | 429   | 10    | 308   | 429   |
| Gm02.VB.93  | Gm02 | 44530000 | 44540000 | 10000   | 1   | W | W | W | W | W | H | I | 0   | 0     | 0    | 0     | 1     | 8     | 34    |
| Gm02.VB.94  | Gm02 | 44540000 | 44620000 | 80000   | 3   | W | W | W | W | W | W | I | 2   | 10    | 2    | 13    | 2     | 2     | 332   |
| Gm02.VB.95  | Gm02 | 44620000 | 44770000 | 150000  | 11  | W | W | W | W | W | W | I | 2   | 16    | 2    | 16    | 6     | 6     | 354   |
| Gm02.VB.96  | Gm02 | 44770000 | 44850000 | 80000   | 7   | W | B | W | B | D | D | I | 0   | 355   | 0    | 337   | 186   | 166   | 230   |
| Gm02.VB.97  | Gm02 | 44850000 | 45160000 | 310000  | 28  | W | W | W | W | W | W | I | 7   | 29    | 7    | 30    | 22    | 21    | 784   |
| Gm02.VB.98  | Gm02 | 45160000 | 46380000 | 1220000 | 104 | W | B | W | B | B | B | I | 100 | 4501  | 102  | 4483  | 4088  | 4175  | 3282  |
| Gm02.VB.99  | Gm02 | 46380000 | 46850000 | 470000  | 46  | W | W | W | W | W | W | I | 21  | 33    | 30   | 32    | 25    | 28    | 1322  |
| Gm02.VB.100 | Gm02 | 46850000 | 47060000 | 210000  | 20  | W | W | S | W | W | W | I | 3   | 8     | 798  | 8     | 7     | 7     | 423   |
| Gm02.VB.101 | Gm02 | 47060000 | 47140000 | 80000   | 5   | W | B | S | B | B | B | I | 5   | 208   | 245  | 200   | 198   | 190   | 135   |
| Gm02.VB.102 | Gm02 | 47140000 | 47250000 | 110000  | 13  | W | W | W | W | W | W | I | 2   | 8     | 8    | 8     | 6     | 5     | 138   |
| Gm02.VB.103 | Gm02 | 47250000 | 47300000 | 50000   | 5   | W | W | S | W | W | W | I | 1   | 5     | 197  | 5     | 4     | 5     | 91    |
| Gm02.VB.104 | Gm02 | 47300000 | 47690000 | 390000  | 32  | W | B | S | B | B | B | I | 26  | 1381  | 1096 | 1325  | 1264  | 1292  | 840   |
| Gm02.VB.105 | Gm02 | 47690000 | 48130000 | 440000  | 52  | W | B | W | B | B | B | I | 22  | 1085  | 30   | 1068  | 944   | 983   | 1163  |
| Gm02.VB.106 | Gm02 | 48130000 | 48280000 | 150000  | 15  | W | B | S | B | B | B | I | 6   | 349   | 294  | 349   | 330   | 338   | 183   |
| Gm02.VB.107 | Gm02 | 48280000 | 48400000 | 120000  | 11  | W | B | W | B | B | B | I | 0   | 331   | 3    | 329   | 313   | 324   | 235   |
| Gm02.VB.108 | Gm02 | 48400000 | 48580000 | 180000  | 21  | W | W | W | W | W | W | I | 6   | 15    | 11   | 16    | 15    | 15    | 384   |
| Gm02.VB.109 | Gm02 | 48580000 | 48950000 | 370000  | 41  | W | B | B | B | B | B | I | 10  | 1127  | 1036 | 1104  | 1010  | 1069  | 575   |
| Gm02.VB.110 | Gm02 | 48950000 | 49050000 | 100000  | 11  | W | W | W | W | W | W | I | 7   | 9     | 10   | 9     | 6     | 6     | 233   |
| Gm02.VB.111 | Gm02 | 49050000 | 49070000 | 20000   | 3   | W | B | S | B | D | D | I | 1   | 44    | 58   | 46    | 36    | 35    | 46    |
| Gm02.VB.112 | Gm02 | 49070000 | 49150000 | 80000   | 9   | W | W | S | W | W | W | I | 2   | 4     | 276  | 4     | 3     | 4     | 332   |
| Gm02.VB.113 | Gm02 | 49150000 | 49270000 | 120000  | 15  | W | W | W | W | W | W | I | 7   | 11    | 9    | 12    | 12    | 12    | 211   |
| Gm02.VB.114 | Gm02 | 49270000 | 49310000 | 40000   | 2   | W | B | B |   |   |   |   |     |       |      |       |       |       |       |



|             |      |          |          |         |     |   |   |   |   |   |   |   |      |       |       |       |       |       |      |
|-------------|------|----------|----------|---------|-----|---|---|---|---|---|---|---|------|-------|-------|-------|-------|-------|------|
| Gm02.VB.115 | Gm02 | 49310000 | 49600000 | 290000  | 29  | W | W | W | W | W | W | I | 23   | 27    | 39    | 26    | 22    | 24    | 930  |
| Gm02.VB.116 | Gm02 | 49600000 | 49790000 | 190000  | 25  | W | W | S | W | W | W | I | 20   | 18    | 511   | 19    | 15    | 13    | 456  |
| Gm02.VB.117 | Gm02 | 49790000 | 49950000 | 160000  | 19  | W | W | W | W | W | W | I | 30   | 33    | 36    | 31    | 32    | 31    | 320  |
| Gm02.VB.118 | Gm02 | 49950000 | 49980000 | 30000   | 4   | W | B | W | B | B | B | I | 0    | 87    | 0     | 85    | 81    | 82    | 82   |
| Gm02.VB.119 | Gm02 | 49980000 | 50000000 | 20000   | 2   | W | B | S | B | B | B | I | 0    | 128   | 98    | 127   | 123   | 124   | 66   |
| Gm02.VB.120 | Gm02 | 50000000 | 50140000 | 140000  | 18  | W | B | W | B | B | B | I | 25   | 177   | 33    | 177   | 171   | 175   | 107  |
| Gm02.VB.121 | Gm02 | 50140000 | 50750000 | 610000  | 82  | W | B | S | B | B | B | I | 23   | 2042  | 1883  | 2025  | 1884  | 1922  | 1284 |
| Gm02.VB.122 | Gm02 | 50750000 | 50930000 | 180000  | 27  | W | W | W | W | W | W | I | 11   | 19    | 15    | 19    | 12    | 11    | 440  |
| Gm02.VB.123 | Gm02 | 50930000 | 51656713 | 726713  | 81  | W | B | B | B | B | B | I | 30   | 2155  | 2057  | 2104  | 1970  | 2024  | 1467 |
| Gm03.VB.1   | Gm03 | 0        | 160000   | 160000  | 12  | W | W | W | W | W | H | I | 11   | 20    | 27    | 20    | 22    | 98    | 125  |
| Gm03.VB.2   | Gm03 | 160000   | 200000   | 40000   | 4   | W | W | S | W | W | H | I | 0    | 0     | 263   | 0     | 0     | 22    | 241  |
| Gm03.VB.3   | Gm03 | 200000   | 600000   | 400000  | 44  | W | B | S | B | B | H | I | 24   | 1219  | 1312  | 1187  | 1107  | 1121  | 1199 |
| Gm03.VB.4   | Gm03 | 600000   | 740000   | 140000  | 11  | W | B | W | B | B | W | I | 19   | 861   | 23    | 820   | 718   | 25    | 380  |
| Gm03.VB.5   | Gm03 | 740000   | 990000   | 250000  | 22  | W | B | W | B | B | H | I | 23   | 567   | 23    | 558   | 526   | 316   | 695  |
| Gm03.VB.6   | Gm03 | 990000   | 1530000  | 540000  | 37  | W | B | W | B | B | W | I | 35   | 1796  | 35    | 1728  | 1683  | 46    | 2068 |
| Gm03.VB.7   | Gm03 | 1530000  | 2000000  | 470000  | 37  | W | B | W | B | B | H | I | 43   | 2233  | 43    | 2205  | 2084  | 1871  | 1337 |
| Gm03.VB.8   | Gm03 | 2000000  | 2240000  | 240000  | 16  | W | B | S | B | B | H | I | 65   | 1353  | 1211  | 1298  | 1196  | 1102  | 762  |
| Gm03.VB.9   | Gm03 | 2240000  | 2910000  | 670000  | 38  | W | B | W | B | B | H | I | 61   | 3750  | 94    | 3606  | 3395  | 2827  | 2211 |
| Gm03.VB.10  | Gm03 | 2910000  | 3600000  | 690000  | 45  | W | B | S | B | B | B | I | 80   | 4620  | 3862  | 4535  | 4285  | 4216  | 2894 |
| Gm03.VB.11  | Gm03 | 3600000  | 3910000  | 310000  | 16  | W | B | W | B | B | B | I | 64   | 1947  | 72    | 1948  | 1788  | 1814  | 1029 |
| Gm03.VB.12  | Gm03 | 3910000  | 6260000  | 2350000 | 105 | W | B | S | B | D | H | I | 1088 | 12495 | 12869 | 12162 | 12472 | 11445 | 9002 |
| Gm03.VB.13  | Gm03 | 6260000  | 6340000  | 80000   | 0   | W | W | S | W | S | H | I | 4    | 7     | 104   | 7     | 93    | 88    | 191  |
| Gm03.VB.14  | Gm03 | 6340000  | 6360000  | 20000   | 0   | W | W | W | W | W | W | W | 0    | 0     | 0     | 0     | 0     | 0     | 0    |
| Gm03.VB.15  | Gm03 | 6360000  | 6370000  | 10000   | 0   | W | W | W | G | W | W | W | 0    | 1     | 0     | 6     | 0     | 0     | 1    |
| Gm03.VB.16  | Gm03 | 6370000  | 6380000  | 10000   | 0   | W | B | W | G | D | H | I | 0    | 20    | 2     | 13    | 5     | 38    | 23   |
| Gm03.VB.17  | Gm03 | 6380000  | 6510000  | 130000  | 5   | W | B | S | W | S | H | I | 93   | 115   | 9     | 101   | 8     | 154   | 121  |
| Gm03.VB.18  | Gm03 | 6510000  | 6520000  | 10000   | 0   | W | W | S | G | D | H | I | 13   | 15    | 1     | 10    | 9     | 11    | 9    |
| Gm03.VB.19  | Gm03 | 6520000  | 7240000  | 720000  | 28  | W | W | S | W | S | H | I | 1114 | 1096  | 2111  | 1079  | 1993  | 2675  | 3123 |
| Gm03.VB.20  | Gm03 | 7240000  | 7250000  | 10000   | 0   | W | W | S | W | D | W | I | 0    | 0     | 5     | 0     | 11    | 0     | 25   |
| Gm03.VB.21  | Gm03 | 7250000  | 7260000  | 10000   | 0   | W | W | S | W | S | S | I | 9    | 9     | 1     | 9     | 0     | 2     | 172  |
| Gm03.VB.22  | Gm03 | 7260000  | 7560000  | 300000  | 3   | W | W | W | W | W | W | I | 13   | 18    | 62    | 18    | 35    | 10    | 1374 |
| Gm03.VB.23  | Gm03 | 7560000  | 7580000  | 20000   | 0   | W | B | B | B | B | B | I | 9    | 7     | 1     | 2     | 0     | 0     | 78   |
| Gm03.VB.24  | Gm03 | 7580000  | 7600000  | 20000   | 1   | W | W | W | W | D | W | I | 1    | 1     | 3     | 1     | 9     | 0     | 122  |
| Gm03.VB.25  | Gm03 | 7600000  | 7610000  | 10000   | 1   | W | W | S | W | D | H | I | 2    | 2     | 98    | 2     | 62    | 15    | 47   |
| Gm03.VB.26  | Gm03 | 7610000  | 7660000  | 50000   | 2   | W | W | S | W | S | H | I | 66   | 65    | 79    | 65    | 70    | 169   | 129  |
| Gm03.VB.27  | Gm03 | 7660000  | 7780000  | 120000  | 3   | W | W | W | W | W | H | I | 41   | 51    | 12    | 47    | 19    | 347   | 171  |
| Gm03.VB.28  | Gm03 | 7780000  | 8840000  | 1060000 | 32  | W | W | S | W | S | H | I | 1203 | 1229  | 2899  | 1207  | 2752  | 2767  | 3526 |
| Gm03.VB.29  | Gm03 | 8840000  | 9070000  | 230000  | 8   | W | W | S | W | D | H | I | 36   | 41    | 235   | 40    | 203   | 407   | 372  |
| Gm03.VB.30  | Gm03 | 9070000  | 9280000  | 210000  | 4   | W | W | S | W | S | H | I | 363  | 355   | 603   | 343   | 598   | 470   | 422  |
| Gm03.VB.31  | Gm03 | 9280000  | 9350000  | 70000   | 0   | W | W | S | W | D | W | W | 21   | 22    | 82    | 16    | 95    | 38    | 27   |
| Gm03.VB.32  | Gm03 | 9350000  | 9380000  | 30000   | 0   | W | W | W | W | W | W | W | 0    | 0     | 0     | 0     | 0     | 0     | 0    |
| Gm03.VB.33  | Gm03 | 9380000  | 9450000  | 70000   | 0   | W | B | S | G | S | S | S | 40   | 43    | 12    | 44    | 10    | 23    | 23   |
| Gm03.VB.34  | Gm03 | 9450000  | 12370000 | 2920000 | 25  | W | W | S | W | S | H | I | 2102 | 2036  | 3357  | 2064  | 3380  | 4117  | 8828 |
| Gm03.VB.35  | Gm03 | 12370000 | 12390000 | 20000   | 0   | W | W | W | W | W | H | W | 2    | 6     | 0     | 10    | 0     | 13    | 0    |
| Gm03.VB.36  | Gm03 | 12390000 | 12520000 | 130000  | 1   | W | W | W | W | W | H | I | 8    | 19    | 44    | 10    | 48    | 124   | 294  |
| Gm03.VB.37  | Gm03 | 12520000 | 12620000 | 100000  | 2   | W | W | S | W | W | W | I | 9    | 13    | 49    | 15    | 41    | 12    | 524  |
| Gm03.VB.38  | Gm03 | 12620000 | 13170000 | 550000  | 4   | W | W | S | W | S | H | I | 248  | 229   | 369   | 229   | 374   | 678   | 2072 |
| Gm03.VB.39  | Gm03 | 13170000 | 13220000 | 50000   | 0   | W | W | W | W | W | W | W | 0    | 0     | 9     | 0     | 11    | 11    | 7    |
| Gm03.VB.40  | Gm03 | 13220000 | 13260000 | 40000   | 0   | W | W | W | W | W | H | I | 4    | 4     | 0     | 12    | 3     | 28    | 24   |
| Gm03.VB.41  | Gm03 | 13260000 | 13360000 | 100000  | 0   | W | W | W | W | W | W | W | 2    | 3     | 0     | 3     | 0     | 6     | 9    |
| Gm03.VB.42  | Gm03 | 13360000 | 13410000 | 50000   | 0   | W | W | W | W | W | H | I | 5    | 3     | 12    | 5     | 3     | 48    | 23   |
| Gm03.VB.43  | Gm03 | 13410000 | 13420000 | 10000   | 0   | W | B | S | W | D | H | W | 0    | 5     | 10    | 0     | 12    | 14    | 2    |
| Gm03.VB.44  | Gm03 | 13420000 | 13430000 | 10000   | 0   | W | W | S | W | S | H | I | 29   | 32    | 3     | 32    | 2     | 29    | 26   |
| Gm03.VB.45  | Gm03 | 13430000 | 13540000 | 110000  | 5   | W | W | W | W | W | W | W | 9    | 16    | 6     | 8     | 7     | 39    | 25   |
| Gm03.VB.46  | Gm03 | 13540000 | 14000000 | 460000  | 1   | W | W | S | W | S | H | I | 258  | 245   | 339   | 253   | 340   | 731   | 1965 |
| Gm03.VB.47  | Gm03 | 14000000 | 14030000 | 30000   | 0   | W | W | S | W | D | H | I | 7    | 6     | 38    | 5     | 25    | 31    | 70   |
| Gm03.VB.48  | Gm03 | 14030000 | 14050000 | 20000   | 0   | W | W | W | W | W | H | I | 4    | 7     | 2     | 7     | 0     | 36    | 37   |
| Gm03.VB.49  | Gm03 | 14050000 | 14170000 | 120000  | 1   | W | W | W | W | W | W | W | 1    | 1     | 3     | 3     | 5     | 3     | 5    |
| Gm03.VB.50  | Gm03 | 14170000 | 14180000 | 10000   | 0   | W | W | W | W | D | W | W | 1    | 1     | 3     | 1     | 5     | 2     | 1    |
| Gm03.VB.51  | Gm03 | 14180000 | 14200000 | 20000   | 0   | W | W | S | W | D | W | W | 4    | 4     | 14    | 3     | 21    | 11    | 5    |
| Gm03.VB.52  | Gm03 | 14200000 | 14500000 | 300000  | 6   | W | W | S | W | S | H | I | 275  | 275   | 481   | 265   | 473   | 419   | 344  |
| Gm03.VB.53  | Gm03 | 14500000 | 14510000 | 10000   | 0   | W | W | W | W | D | H | W | 0    | 0     | 0     | 0     | 5     | 23    | 0    |
| Gm03.VB.54  | Gm03 | 14510000 | 14540000 | 30000   | 0   | W | W | W | W | W | H | I | 0    | 0     | 6     | 2     | 0     | 49    | 17   |
| Gm03.VB.55  | Gm03 | 14540000 | 14660000 | 120000  | 1   | W | W | W | W | W | H | I | 11   | 9     | 9     | 12    | 16    | 145   | 72   |
| Gm03.VB.56  | Gm03 | 14660000 | 15620000 | 960000  | 14  | W | W | S | W | S | H | I | 941  | 905   | 1527  | 908   | 1543  | 1393  | 2141 |
| Gm03.VB.57  | Gm03 | 15620000 | 16150000 | 530000  | 1   | W | W | S | W | S | H | I | 120  | 119   | 323   | 112   | 316   | 786   | 1026 |
| Gm03.VB.58  | Gm03 | 16150000 | 18620000 | 2470000 | 28  | W | W | W | W | W | H | I | 114  | 188   | 186   | 179   | 178   | 2392  | 3653 |
| Gm03.VB.59  | Gm03 | 18620000 | 19220000 | 600000  | 19  | W | W | W | W | W | W | I | 30   | 45    | 46    | 47    | 40    | 41    | 830  |
| Gm03.VB.60  | Gm03 | 19220000 | 23420000 | 4200000 | 69  | W | B | S | B | S | H | I | 4094 | 6866  | 7435  | 6852  | 7408  | 8911  | 8651 |
| Gm03.VB.61  | Gm03 | 23420000 | 23660000 | 240000  | 1   | W | W | W | W | W | W | W | 51   | 48    | 43    | 44    | 36    | 60    | 116  |
| Gm03.VB.62  | Gm03 | 23660000 | 24010000 | 350000  | 5   | W | W | W | W | W | H | I | 10   | 33    | 16    | 33    | 16    | 162   | 246  |
| Gm03.VB.63  | Gm03 | 24010000 | 24160000 | 150000  | 1   | W | W | W | W | W | W | I | 2    | 9     | 6     | 9     | 4     | 7     | 73   |
| Gm03.VB.64  | Gm03 | 24160000 | 24450000 | 290000  | 4   | W | W | W | W | W | H | I | 5    | 20    | 17    | 19    | 20    | 173   | 229  |
| Gm03.VB.65  | Gm03 | 24450000 | 24620000 | 170000  | 1   | W | W | W | W | W | W | I | 5    | 18    | 8     | 7     | 14    | 37    | 91   |
| Gm03.VB.66  | Gm03 | 24620000 | 28120000 | 3500000 | 39  | W | W | W | W | W | H | I | 143  | 240   | 227   | 227   | 259   | 2595  | 3334 |
| Gm03.VB.67  | Gm03 | 28120000 | 28220000 | 100000  | 3   | W | W | W | W | W | W | I | 5    | 6     | 6     | 7     | 5     | 16    | 76   |
| Gm03.VB.68  | Gm03 | 28220000 | 28440000 | 220000  | 3   | W | W | W | W | W | H | I | 9    | 13    | 12    | 15    | 12    | 704   | 1851 |
| Gm03.VB.69  | Gm03 | 28440000 | 28720000 | 280000  | 10  | W | W | W | W | W | W | I | 5    | 12    | 10    | 10    | 10    | 45    | 843  |

|             |      |          |          |         |    |   |   |   |   |   |   |   |     |      |      |      |      |      |      |
|-------------|------|----------|----------|---------|----|---|---|---|---|---|---|---|-----|------|------|------|------|------|------|
| Gm03.VB.70  | Gm03 | 28720000 | 29670000 | 950000  | 20 | W | W | W | W | W | H | I | 66  | 106  | 91   | 95   | 74   | 550  | 480  |
| Gm03.VB.71  | Gm03 | 29670000 | 29780000 | 110000  | 0  | W | W | W | W | W | W | I | 0   | 8    | 4    | 7    | 4    | 4    | 375  |
| Gm03.VB.72  | Gm03 | 29780000 | 30260000 | 480000  | 11 | W | W | W | W | W | H | I | 18  | 40   | 29   | 35   | 21   | 343  | 714  |
| Gm03.VB.73  | Gm03 | 30260000 | 30630000 | 370000  | 16 | W | W | W | W | W | W | I | 46  | 524  | 349  | 520  | 334  | 282  | 703  |
| Gm03.VB.74  | Gm03 | 30630000 | 30820000 | 190000  | 9  | W | W | W | W | W | H | I | 32  | 532  | 326  | 525  | 321  | 302  | 663  |
| Gm03.VB.75  | Gm03 | 30820000 | 31070000 | 250000  | 10 | W | W | W | W | W | W | W | 43  | 706  | 350  | 707  | 343  | 264  | 319  |
| Gm03.VB.76  | Gm03 | 31070000 | 31360000 | 290000  | 4  | W | W | W | W | W | H | I | 53  | 474  | 455  | 481  | 466  | 776  | 1057 |
| Gm03.VB.77  | Gm03 | 31360000 | 31550000 | 190000  | 5  | W | W | W | W | W | W | I | 16  | 175  | 173  | 167  | 158  | 169  | 628  |
| Gm03.VB.78  | Gm03 | 31550000 | 31750000 | 200000  | 5  | W | B | B | B | W | W | I | 63  | 402  | 391  | 377  | 338  | 352  | 1130 |
| Gm03.VB.79  | Gm03 | 31750000 | 31760000 | 10000   | 0  | W | B | W | B | B | B | I | 5   | 33   | 32   | 34   | 35   | 36   | 74   |
| Gm03.VB.80  | Gm03 | 31760000 | 33050000 | 1290000 | 45 | W | W | W | W | W | W | I | 111 | 170  | 142  | 163  | 127  | 137  | 2928 |
| Gm03.VB.81  | Gm03 | 33050000 | 33410000 | 360000  | 5  | W | B | W | B | W | W | I | 76  | 2679 | 83   | 2642 | 67   | 78   | 801  |
| Gm03.VB.82  | Gm03 | 33410000 | 33960000 | 550000  | 16 | W | W | W | W | W | W | I | 21  | 118  | 39   | 98   | 35   | 43   | 2248 |
| Gm03.VB.83  | Gm03 | 33960000 | 34170000 | 210000  | 15 | W | B | W | W | W | W | I | 17  | 959  | 29   | 30   | 23   | 27   | 329  |
| Gm03.VB.84  | Gm03 | 34170000 | 34700000 | 530000  | 23 | W | W | W | W | W | W | I | 92  | 120  | 117  | 107  | 106  | 123  | 2435 |
| Gm03.VB.85  | Gm03 | 34700000 | 34790000 | 90000   | 3  | W | B | W | W | W | W | I | 27  | 462  | 29   | 24   | 26   | 29   | 250  |
| Gm03.VB.86  | Gm03 | 34790000 | 34830000 | 40000   | 2  | W | B | W | W | W | H | I | 0   | 440  | 2    | 2    | 2    | 94   | 91   |
| Gm03.VB.87  | Gm03 | 34830000 | 34850000 | 20000   | 1  | W | B | W | W | W | W | I | 2   | 125  | 3    | 3    | 3    | 3    | 80   |
| Gm03.VB.88  | Gm03 | 34850000 | 34970000 | 120000  | 4  | W | W | W | W | W | W | I | 13  | 17   | 18   | 12   | 6    | 13   | 459  |
| Gm03.VB.89  | Gm03 | 34970000 | 34980000 | 10000   | 1  | W | B | W | W | W | W | I | 1   | 23   | 0    | 0    | 0    | 2    | 12   |
| Gm03.VB.90  | Gm03 | 34980000 | 35220000 | 240000  | 13 | W | B | W | W | W | H | I | 34  | 929  | 48   | 40   | 37   | 443  | 583  |
| Gm03.VB.91  | Gm03 | 35220000 | 35230000 | 10000   | 1  | W | W | W | W | W | H | I | 0   | 2    | 0    | 0    | 0    | 6    | 23   |
| Gm03.VB.92  | Gm03 | 35230000 | 35310000 | 80000   | 7  | W | W | W | W | W | W | I | 4   | 5    | 12   | 12   | 12   | 7    | 359  |
| Gm03.VB.93  | Gm03 | 35310000 | 35460000 | 150000  | 6  | W | W | S | G | D | W | I | 8   | 113  | 434  | 425  | 436  | 104  | 395  |
| Gm03.VB.94  | Gm03 | 35460000 | 35510000 | 50000   | 3  | W | W | W | W | W | W | I | 1   | 6    | 55   | 54   | 54   | 7    | 168  |
| Gm03.VB.95  | Gm03 | 35510000 | 35540000 | 30000   | 2  | W | W | W | W | W | H | I | 10  | 11   | 11   | 11   | 11   | 71   | 89   |
| Gm03.VB.96  | Gm03 | 35540000 | 35770000 | 230000  | 15 | W | B | W | W | W | H | I | 11  | 582  | 17   | 18   | 16   | 483  | 722  |
| Gm03.VB.97  | Gm03 | 35770000 | 36020000 | 250000  | 10 | W | B | B | B | W | B | I | 52  | 1818 | 1634 | 1578 | 62   | 1640 | 1172 |
| Gm03.VB.98  | Gm03 | 36020000 | 36110000 | 90000   | 6  | W | B | W | W | W | W | I | 2   | 95   | 27   | 26   | 62   | 62   | 196  |
| Gm03.VB.99  | Gm03 | 36110000 | 36250000 | 140000  | 7  | W | W | W | W | W | W | I | 32  | 41   | 40   | 41   | 26   | 31   | 513  |
| Gm03.VB.100 | Gm03 | 36250000 | 36280000 | 30000   | 4  | W | W | S | S | W | H | I | 2   | 4    | 159  | 158  | 6    | 89   | 88   |
| Gm03.VB.101 | Gm03 | 36280000 | 36560000 | 280000  | 19 | W | B | S | S | W | S | I | 21  | 767  | 799  | 778  | 19   | 678  | 1051 |
| Gm03.VB.102 | Gm03 | 36560000 | 36640000 | 80000   | 3  | W | B | B | B | B | H | I | 24  | 702  | 686  | 664  | 626  | 269  | 163  |
| Gm03.VB.103 | Gm03 | 36640000 | 36940000 | 300000  | 24 | W | B | B | B | B | W | I | 27  | 433  | 444  | 431  | 393  | 27   | 684  |
| Gm03.VB.104 | Gm03 | 36940000 | 37090000 | 150000  | 9  | W | B | S | S | S | H | I | 15  | 660  | 441  | 437  | 386  | 308  | 357  |
| Gm03.VB.105 | Gm03 | 37090000 | 37240000 | 150000  | 9  | W | B | W | W | W | H | I | 3   | 879  | 9    | 11   | 10   | 466  | 350  |
| Gm03.VB.106 | Gm03 | 37240000 | 37500000 | 260000  | 16 | W | B | S | S | S | H | I | 10  | 1319 | 1218 | 1197 | 1121 | 822  | 829  |
| Gm03.VB.107 | Gm03 | 37500000 | 37600000 | 100000  | 11 | W | W | S | S | S | W | I | 2   | 18   | 91   | 93   | 93   | 4    | 108  |
| Gm03.VB.108 | Gm03 | 37600000 | 37740000 | 140000  | 8  | W | W | S | S | S | W | I | 17  | 26   | 313  | 309  | 281  | 10   | 232  |
| Gm03.VB.109 | Gm03 | 37740000 | 37750000 | 10000   | 0  | W | B | S | S | S | W | I | 0   | 104  | 18   | 18   | 18   | 0    | 43   |
| Gm03.VB.110 | Gm03 | 37750000 | 37810000 | 60000   | 4  | W | B | S | S | S | B | I | 3   | 84   | 320  | 322  | 267  | 73   | 234  |
| Gm03.VB.111 | Gm03 | 37810000 | 37910000 | 100000  | 14 | W | W | S | S | D | W | I | 3   | 11   | 355  | 325  | 285  | 24   | 163  |
| Gm03.VB.112 | Gm03 | 37910000 | 37970000 | 60000   | 5  | W | B | S | S | S | H | I | 0   | 148  | 67   | 67   | 64   | 178  | 132  |
| Gm03.VB.113 | Gm03 | 37970000 | 38130000 | 160000  | 16 | W | B | S | S | S | W | I | 0   | 647  | 869  | 843  | 799  | 3    | 456  |
| Gm03.VB.114 | Gm03 | 38130000 | 38160000 | 30000   | 4  | W | B | B | B | B | H | I | 0   | 106  | 137  | 132  | 125  | 80   | 110  |
| Gm03.VB.115 | Gm03 | 38160000 | 38250000 | 90000   | 8  | W | W | S | S | S | H | I | 13  | 9    | 322  | 317  | 292  | 143  | 138  |
| Gm03.VB.116 | Gm03 | 38250000 | 38360000 | 110000  | 10 | W | W | W | W | W | H | I | 15  | 16   | 18   | 20   | 7    | 153  | 128  |
| Gm03.VB.117 | Gm03 | 38360000 | 38380000 | 20000   | 1  | W | W | S | S | W | W | I | 5   | 5    | 14   | 14   | 12   | 5    | 49   |
| Gm03.VB.118 | Gm03 | 38380000 | 38450000 | 70000   | 6  | W | W | S | S | S | W | I | 7   | 9    | 305  | 296  | 254  | 11   | 184  |
| Gm03.VB.119 | Gm03 | 38450000 | 38520000 | 70000   | 10 | W | B | W | W | W | B | I | 0   | 225  | 4    | 4    | 4    | 224  | 229  |
| Gm03.VB.120 | Gm03 | 38520000 | 38680000 | 160000  | 14 | W | W | W | W | W | W | I | 9   | 22   | 14   | 14   | 18   | 21   | 417  |
| Gm03.VB.121 | Gm03 | 38680000 | 38770000 | 90000   | 8  | W | B | W | W | W | B | I | 16  | 246  | 22   | 20   | 20   | 232  | 268  |
| Gm03.VB.122 | Gm03 | 38770000 | 39000000 | 230000  | 15 | W | B | W | W | W | W | I | 9   | 707  | 13   | 12   | 12   | 14   | 522  |
| Gm03.VB.123 | Gm03 | 39000000 | 39340000 | 340000  | 28 | W | W | W | W | W | W | I | 13  | 28   | 22   | 22   | 19   | 22   | 812  |
| Gm03.VB.124 | Gm03 | 39340000 | 39490000 | 150000  | 16 | W | W | S | S | S | H | I | 19  | 26   | 353  | 348  | 320  | 407  | 513  |
| Gm03.VB.125 | Gm03 | 39490000 | 39760000 | 270000  | 25 | W | B | B | B | B | H | I | 34  | 756  | 751  | 734  | 683  | 418  | 640  |
| Gm03.VB.126 | Gm03 | 39760000 | 40080000 | 320000  | 30 | W | B | W | W | W | W | I | 19  | 1889 | 31   | 29   | 26   | 35   | 791  |
| Gm03.VB.127 | Gm03 | 40080000 | 40870000 | 790000  | 80 | W | B | W | W | W | H | I | 58  | 3906 | 67   | 59   | 46   | 2317 | 2166 |
| Gm03.VB.128 | Gm03 | 40870000 | 41040000 | 170000  | 24 | W | B | S | S | S | H | I | 0   | 808  | 738  | 726  | 688  | 540  | 146  |
| Gm03.VB.129 | Gm03 | 41040000 | 41350000 | 310000  | 33 | W | B | W | W | W | H | I | 18  | 1572 | 26   | 22   | 17   | 1081 | 715  |
| Gm03.VB.130 | Gm03 | 41350000 | 41500000 | 150000  | 13 | W | W | W | W | W | W | I | 6   | 10   | 7    | 5    | 7    | 8    | 293  |
| Gm03.VB.131 | Gm03 | 41500000 | 41530000 | 30000   | 3  | W | W | W | W | W | W | I | 0   | 5    | 0    | 0    | 0    | 5    | 30   |
| Gm03.VB.132 | Gm03 | 41530000 | 41680000 | 150000  | 11 | W | B | W | W | W | H | I | 21  | 365  | 24   | 22   | 20   | 427  | 286  |
| Gm03.VB.133 | Gm03 | 41680000 | 41730000 | 50000   | 5  | W | B | W | W | W | W | I | 17  | 79   | 12   | 12   | 5    | 8    | 40   |
| Gm03.VB.134 | Gm03 | 41730000 | 41870000 | 140000  | 16 | W | W | W | W | W | W | I | 9   | 9    | 9    | 8    | 7    | 8    | 215  |
| Gm03.VB.135 | Gm03 | 41870000 | 42130000 | 260000  | 32 | W | B | W | W | W | W | I | 1   | 611  | 2    | 2    | 3    | 13   | 623  |
| Gm03.VB.136 | Gm03 | 42130000 | 42320000 | 190000  | 16 | W | B | W | W | W | H | I | 6   | 614  | 9    | 9    | 9    | 346  | 415  |
| Gm03.VB.137 | Gm03 | 42320000 | 42880000 | 560000  | 68 | W | W | W | W | W | W | I | 31  | 67   | 35   | 32   | 30   | 63   | 1123 |
| Gm03.VB.138 | Gm03 | 42880000 | 43020000 | 140000  | 21 | W | W | W | W | W | H | I | 1   | 3    | 2    | 1    | 3    | 579  | 328  |
| Gm03.VB.139 | Gm03 | 43020000 | 43310000 | 290000  | 28 | W | W | W | W | W | W | I | 7   | 9    | 12   | 10   | 12   | 15   | 553  |
| Gm03.VB.140 | Gm03 | 43310000 | 43360000 | 50000   | 6  | W | W | S | S | S | W | I | 0   | 1    | 75   | 77   | 74   | 1    | 103  |
| Gm03.VB.141 | Gm03 | 43360000 | 43470000 | 110000  | 14 | W | W | W | W | W | W | I | 0   | 1    | 0    | 0    | 0    | 3    | 161  |
| Gm03.VB.142 | Gm03 | 43470000 | 43620000 | 150000  | 19 | W | W | W | W | W | H | I | 14  | 14   | 16   | 17   | 16   | 534  | 256  |
| Gm03.VB.143 | Gm03 | 43620000 | 44020000 | 400000  | 55 | W | W | W | W | W | W | I | 6   | 12   | 9    | 8    | 5    | 22   | 961  |
| Gm03.VB.144 | Gm03 | 44020000 | 44110000 | 90000   | 9  | W | W | W | W | W | H | I | 6   | 8    | 6    | 6    | 6    | 173  | 202  |
| Gm03.VB.145 | Gm03 | 44110000 | 44400000 | 290000  | 38 | W | W | W | W | W | W | I | 7   | 13   | 14   | 12   | 9    | 13   | 280  |
| Gm03.VB.146 | Gm03 | 44400000 | 44480000 | 80000   | 10 | W | W | S | S | S | S | I | 21  | 21   | 256  | 244  | 218  | 229  | 136  |
| Gm03.VB.147 | Gm03 | 44480000 | 44560000 | 8000    |    |   |   |   |   |   |   |   |     |      |      |      |      |      |      |

|             |      |          |          |          |     |   |   |   |   |   |   |   |     |       |       |       |       |      |       |
|-------------|------|----------|----------|----------|-----|---|---|---|---|---|---|---|-----|-------|-------|-------|-------|------|-------|
| Gm03.VB.148 | Gm03 | 44560000 | 44700000 | 140000   | 18  | W | B | W | W | W | W | I | 5   | 159   | 9     | 8     | 6     | 5    | 324   |
| Gm03.VB.149 | Gm03 | 44700000 | 44710000 | 10000    | 2   | W | B | S | S | D | D | I | 0   | 37    | 31    | 30    | 22    | 22   | 23    |
| Gm03.VB.150 | Gm03 | 44710000 | 44810000 | 100000   | 8   | W | B | S | S | S | W | I | 5   | 421   | 322   | 327   | 270   | 6    | 214   |
| Gm03.VB.151 | Gm03 | 44810000 | 45010000 | 200000   | 21  | W | B | B | B | B | H | I | 24  | 719   | 744   | 731   | 698   | 195  | 352   |
| Gm03.VB.152 | Gm03 | 45010000 | 45130000 | 120000   | 11  | W | B | B | B | B | W | I | 15  | 459   | 467   | 449   | 408   | 18   | 71    |
| Gm03.VB.153 | Gm03 | 45130000 | 45230000 | 100000   | 16  | W | B | B | B | B | H | I | 13  | 376   | 386   | 378   | 349   | 183  | 163   |
| Gm03.VB.154 | Gm03 | 45230000 | 45350000 | 120000   | 15  | W | B | B | B | B | W | I | 0   | 392   | 396   | 384   | 371   | 9    | 229   |
| Gm03.VB.155 | Gm03 | 45350000 | 45370000 | 20000    | 2   | W | B | B | B | B | H | I | 0   | 50    | 52    | 52    | 42    | 40   | 39    |
| Gm03.VB.156 | Gm03 | 45370000 | 46050000 | 680000   | 90  | W | W | W | W | W | H | I | 40  | 91    | 49    | 51    | 82    | 1231 | 1496  |
| Gm03.VB.157 | Gm03 | 46050000 | 46430000 | 380000   | 45  | W | B | B | B | B | H | I | 35  | 1361  | 1360  | 1339  | 1244  | 858  | 648   |
| Gm03.VB.158 | Gm03 | 46430000 | 47020000 | 590000   | 69  | W | W | W | W | W | W | I | 49  | 71    | 66    | 53    | 57    | 45   | 1309  |
| Gm03.VB.159 | Gm03 | 47020000 | 47370000 | 350000   | 41  | W | B | W | B | B | B | I | 59  | 1292  | 68    | 1281  | 1183  | 1202 | 863   |
| Gm03.VB.160 | Gm03 | 47370000 | 47780000 | 410000   | 49  | W | W | S | W | W | W | I | 32  | 39    | 882   | 40    | 32    | 41   | 799   |
| Gm03.VB.161 | Gm03 | 47780000 | 47781076 | 1076     | 0   | W | B | W | G | D | W | I | 0   | 2     | 0     | 1     | 1     | 0    | 1     |
| Gm04.VB.1   | Gm04 | 0        | 230000   | 230000   | 24  | W | B | W | W | W | W | I | 15  | 507   | 39    | 33    | 20    | 21   | 391   |
| Gm04.VB.2   | Gm04 | 230000   | 270000   | 40000    | 5   | W | W | W | W | W | W | I | 0   | 2     | 3     | 3     | 2     | 3    | 121   |
| Gm04.VB.3   | Gm04 | 270000   | 520000   | 250000   | 35  | W | W | S | S | S | S | I | 7   | 31    | 1053  | 1030  | 913   | 962  | 647   |
| Gm04.VB.4   | Gm04 | 520000   | 600000   | 80000    | 9   | W | W | W | W | W | W | I | 7   | 25    | 15    | 24    | 13    | 12   | 134   |
| Gm04.VB.5   | Gm04 | 600000   | 650000   | 50000    | 5   | W | W | W | W | W | W | I | 0   | 8     | 8     | 8     | 8     | 8    | 28    |
| Gm04.VB.6   | Gm04 | 650000   | 680000   | 30000    | 1   | W | W | S | W | S | S | W | 0   | 2     | 57    | 2     | 55    | 56   | 8     |
| Gm04.VB.7   | Gm04 | 680000   | 880000   | 200000   | 25  | W | W | W | W | W | W | I | 1   | 20    | 10    | 22    | 10    | 13   | 286   |
| Gm04.VB.8   | Gm04 | 880000   | 910000   | 30000    | 2   | W | W | W | W | W | W | I | 3   | 4     | 12    | 1     | 10    | 13   | 33    |
| Gm04.VB.9   | Gm04 | 910000   | 920000   | 10000    | 0   | W | W | S | W | D | D | I | 0   | 0     | 7     | 0     | 5     | 5    | 38    |
| Gm04.VB.10  | Gm04 | 920000   | 1120000  | 200000   | 24  | W | B | S | B | S | S | I | 7   | 663   | 665   | 654   | 610   | 615  | 236   |
| Gm04.VB.11  | Gm04 | 1120000  | 1160000  | 40000    | 6   | W | W | S | W | S | S | I | 1   | 3     | 191   | 3     | 171   | 176  | 70    |
| Gm04.VB.12  | Gm04 | 1160000  | 1520000  | 360000   | 37  | W | W | W | W | W | W | I | 7   | 12    | 24    | 13    | 18    | 17   | 495   |
| Gm04.VB.13  | Gm04 | 1520000  | 1610000  | 90000    | 12  | W | W | S | W | S | S | I | 0   | 1     | 394   | 1     | 341   | 358  | 184   |
| Gm04.VB.14  | Gm04 | 1610000  | 1620000  | 10000    | 0   | W | W | S | W | W | S | I | 0   | 3     | 5     | 3     | 4     | 5    | 5     |
| Gm04.VB.15  | Gm04 | 1620000  | 1950000  | 330000   | 38  | W | W | W | W | W | W | I | 25  | 65    | 55    | 62    | 41    | 44   | 664   |
| Gm04.VB.16  | Gm04 | 1950000  | 2140000  | 190000   | 16  | W | W | S | W | S | S | I | 12  | 23    | 296   | 23    | 277   | 282  | 287   |
| Gm04.VB.17  | Gm04 | 2140000  | 2700000  | 560000   | 65  | W | B | B | B | B | B | I | 32  | 1864  | 1870  | 1831  | 1689  | 1684 | 1090  |
| Gm04.VB.18  | Gm04 | 2700000  | 3830000  | 1130000  | 126 | W | W | W | W | W | H | I | 58  | 59    | 66    | 59    | 57    | 3740 | 2399  |
| Gm04.VB.19  | Gm04 | 3830000  | 4710000  | 880000   | 86  | W | W | W | W | W | W | I | 42  | 47    | 52    | 48    | 42    | 36   | 1868  |
| Gm04.VB.20  | Gm04 | 4710000  | 4820000  | 110000   | 12  | W | W | S | W | S | W | I | 12  | 13    | 154   | 12    | 147   | 12   | 184   |
| Gm04.VB.21  | Gm04 | 4820000  | 5000000  | 180000   | 18  | W | W | W | W | W | W | I | 13  | 15    | 22    | 14    | 21    | 15   | 335   |
| Gm04.VB.22  | Gm04 | 5000000  | 5040000  | 40000    | 3   | W | W | S | W | S | W | I | 0   | 0     | 31    | 0     | 29    | 0    | 30    |
| Gm04.VB.23  | Gm04 | 5040000  | 5130000  | 90000    | 7   | W | W | W | W | W | W | I | 0   | 3     | 0     | 3     | 0     | 0    | 99    |
| Gm04.VB.24  | Gm04 | 5130000  | 5270000  | 140000   | 12  | W | B | W | B | W | W | I | 31  | 393   | 33    | 378   | 35    | 30   | 213   |
| Gm04.VB.25  | Gm04 | 5270000  | 5280000  | 10000    | 1   | W | B | S | B | S | W | I | 0   | 34    | 20    | 34    | 20    | 0    | 28    |
| Gm04.VB.26  | Gm04 | 5280000  | 5290000  | 10000    | 1   | W | W | S | W | S | W | I | 0   | 0     | 85    | 0     | 79    | 0    | 26    |
| Gm04.VB.27  | Gm04 | 5290000  | 5740000  | 450000   | 51  | W | W | W | W | W | W | I | 31  | 28    | 60    | 28    | 60    | 29   | 783   |
| Gm04.VB.28  | Gm04 | 5740000  | 5760000  | 20000    | 1   | W | W | S | W | S | W | I | 0   | 0     | 62    | 0     | 54    | 0    | 52    |
| Gm04.VB.29  | Gm04 | 5760000  | 6030000  | 270000   | 23  | W | W | W | W | W | W | I | 39  | 50    | 47    | 40    | 36    | 31   | 482   |
| Gm04.VB.30  | Gm04 | 6030000  | 6040000  | 10000    | 2   | W | W | S | W | S | W | I | 0   | 0     | 12    | 0     | 12    | 0    | 7     |
| Gm04.VB.31  | Gm04 | 6040000  | 6140000  | 100000   | 11  | W | B | B | B | B | B | I | 1   | 322   | 349   | 326   | 316   | 300  | 249   |
| Gm04.VB.32  | Gm04 | 6140000  | 6240000  | 100000   | 8   | W | W | S | W | S | W | I | 12  | 13    | 551   | 10    | 484   | 11   | 303   |
| Gm04.VB.33  | Gm04 | 6240000  | 6350000  | 110000   | 9   | W | B | S | B | S | B | I | 9   | 540   | 94    | 535   | 86    | 508  | 288   |
| Gm04.VB.34  | Gm04 | 6350000  | 6600000  | 250000   | 26  | W | W | S | W | S | W | I | 11  | 19    | 243   | 17    | 210   | 17   | 293   |
| Gm04.VB.35  | Gm04 | 6600000  | 6650000  | 50000    | 3   | W | B | S | B | S | B | I | 20  | 192   | 284   | 205   | 257   | 153  | 140   |
| Gm04.VB.36  | Gm04 | 6650000  | 6740000  | 90000    | 11  | W | W | S | W | S | W | I | 0   | 1     | 107   | 1     | 100   | 0    | 148   |
| Gm04.VB.37  | Gm04 | 6740000  | 6870000  | 130000   | 10  | W | W | W | W | W | W | I | 37  | 39    | 77    | 39    | 45    | 41   | 322   |
| Gm04.VB.38  | Gm04 | 6870000  | 7320000  | 450000   | 37  | W | B | S | B | D | B | I | 26  | 2430  | 2506  | 2413  | 1822  | 2050 | 1664  |
| Gm04.VB.39  | Gm04 | 7320000  | 7530000  | 210000   | 17  | W | W | W | W | W | W | I | 9   | 22    | 21    | 24    | 19    | 10   | 503   |
| Gm04.VB.40  | Gm04 | 7530000  | 7550000  | 20000    | 1   | W | B | B | B | B | W | I | 0   | 96    | 98    | 97    | 96    | 0    | 89    |
| Gm04.VB.41  | Gm04 | 7550000  | 7750000  | 200000   | 9   | W | W | W | W | W | W | I | 12  | 46    | 51    | 41    | 41    | 30   | 907   |
| Gm04.VB.42  | Gm04 | 7750000  | 7880000  | 130000   | 6   | W | B | W | B | W | W | I | 13  | 296   | 13    | 289   | 9     | 15   | 475   |
| Gm04.VB.43  | Gm04 | 7880000  | 7900000  | 20000    | 2   | W | W | S | W | W | W | I | 0   | 0     | 35    | 0     | 0     | 0    | 69    |
| Gm04.VB.44  | Gm04 | 7900000  | 7960000  | 60000    | 6   | W | B | S | B | D | W | I | 1   | 115   | 215   | 120   | 64    | 1    | 145   |
| Gm04.VB.45  | Gm04 | 7960000  | 8100000  | 140000   | 14  | W | W | S | W | W | W | I | 12  | 21    | 722   | 19    | 14    | 12   | 376   |
| Gm04.VB.46  | Gm04 | 8100000  | 8330000  | 230000   | 15  | W | B | S | B | D | W | I | 9   | 1381  | 1007  | 1357  | 506   | 9    | 819   |
| Gm04.VB.47  | Gm04 | 8330000  | 8450000  | 120000   | 10  | W | W | W | W | W | W | I | 1   | 5     | 7     | 8     | 5     | 1    | 334   |
| Gm04.VB.48  | Gm04 | 8450000  | 8960000  | 510000   | 30  | W | W | S | W | W | W | I | 30  | 69    | 2483  | 67    | 63    | 22   | 944   |
| Gm04.VB.49  | Gm04 | 8960000  | 9210000  | 250000   | 15  | W | B | S | B | B | W | I | 22  | 1454  | 1258  | 1444  | 1320  | 20   | 860   |
| Gm04.VB.50  | Gm04 | 9210000  | 9340000  | 130000   | 8   | W | B | W | B | B | W | I | 0   | 764   | 4     | 762   | 748   | 0    | 608   |
| Gm04.VB.51  | Gm04 | 9340000  | 12370000 | 3030000  | 89  | W | B | S | B | B | W | I | 234 | 7788  | 10107 | 7755  | 7582  | 222  | 6791  |
| Gm04.VB.52  | Gm04 | 12370000 | 12500000 | 130000   | 1   | W | W | W | W | W | W | I | 1   | 21    | 18    | 20    | 21    | 1    | 291   |
| Gm04.VB.53  | Gm04 | 12500000 | 12540000 | 40000    | 0   | W | W | W | W | D | W | I | 0   | 15    | 16    | 14    | 17    | 0    | 137   |
| Gm04.VB.54  | Gm04 | 12540000 | 12750000 | 210000   | 5   | W | W | W | W | W | W | I | 8   | 59    | 54    | 54    | 55    | 8    | 553   |
| Gm04.VB.55  | Gm04 | 12750000 | 12790000 | 40000    | 1   | W | B | B | B | B | W | I | 1   | 19    | 21    | 20    | 20    | 1    | 198   |
| Gm04.VB.56  | Gm04 | 12790000 | 12940000 | 150000   | 5   | W | W | W | W | W | W | I | 2   | 18    | 16    | 19    | 23    | 5    | 78    |
| Gm04.VB.57  | Gm04 | 12940000 | 13010000 | 70000    | 0   | W | W | W | W | W | W | I | 10  | 19    | 21    | 18    | 14    | 5    | 37    |
| Gm04.VB.58  | Gm04 | 13010000 | 28140000 | 15130000 | 205 | W | B | B | B | B | W | I | 692 | 24569 | 24932 | 24473 | 24557 | 676  | 19436 |
| Gm04.VB.59  | Gm04 | 28140000 | 29580000 | 1440000  | 10  | W | W | W | W | W | W | I | 75  | 169   | 173   | 158   | 157   | 58   | 1323  |
| Gm04.VB.60  | Gm04 | 29580000 | 33780000 | 4200000  | 38  | W | B | B | B | B | W | I | 174 | 25086 | 25105 | 24681 | 25231 | 157  | 4189  |
| Gm04.VB.61  | Gm04 | 33780000 | 36780000 | 3000000  | 31  | W | W | W | W | W | W | I | 130 | 307   | 284   | 309   | 276   | 164  | 4293  |
| Gm04.VB.62  | Gm04 | 36780000 | 36790000 | 10000    | 0   | W | B | W | B | W | W | I | 0   | 5     | 3     | 5     | 4     | 0    | 13    |
| Gm04.VB.63  | Gm04 | 36790000 | 37400000 | 610000   | 14  | W | B | B | B | B | W | I | 27  | 1670  | 1707  | 1663  | 1703  | 22   | 2196  |
| Gm04.VB.64  | Gm04 | 37400000 | 37510000 | 110000   | 1   | W | W | W | W | W | W | I | 1   | 22    | 23    | 25    | 20    | 1    | 638   |



|             |      |          |          |         |    |   |   |   |   |   |   |   |     |      |      |      |      |      |      |
|-------------|------|----------|----------|---------|----|---|---|---|---|---|---|---|-----|------|------|------|------|------|------|
| Gm04.VB.65  | Gm04 | 37510000 | 38230000 | 720000  | 12 | W | B | B | B | B | W | I | 25  | 932  | 929  | 929  | 899  | 17   | 1546 |
| Gm04.VB.66  | Gm04 | 38230000 | 38780000 | 550000  | 15 | W | W | W | W | W | W | I | 35  | 71   | 79   | 65   | 70   | 39   | 745  |
| Gm04.VB.67  | Gm04 | 38780000 | 39240000 | 460000  | 14 | W | B | B | B | B | W | I | 15  | 2395 | 2459 | 2360 | 2372 | 16   | 535  |
| Gm04.VB.68  | Gm04 | 39240000 | 39410000 | 170000  | 3  | W | W | W | W | W | W | I | 3   | 51   | 45   | 49   | 46   | 2    | 746  |
| Gm04.VB.69  | Gm04 | 39410000 | 39630000 | 220000  | 7  | W | W | W | W | W | W | I | 33  | 49   | 52   | 42   | 56   | 22   | 1245 |
| Gm04.VB.70  | Gm04 | 39630000 | 39660000 | 30000   | 1  | W | W | W | W | W | W | I | 0   | 9    | 9    | 10   | 10   | 0    | 155  |
| Gm04.VB.71  | Gm04 | 39660000 | 39760000 | 100000  | 6  | W | B | B | B | B | W | I | 8   | 263  | 264  | 256  | 261  | 5    | 70   |
| Gm04.VB.72  | Gm04 | 39760000 | 39770000 | 10000   | 0  | W | B | S | B | W | W | W | 2   | 8    | 10   | 7    | 4    | 2    | 3    |
| Gm04.VB.73  | Gm04 | 39770000 | 39870000 | 100000  | 3  | W | W | W | W | W | W | I | 16  | 31   | 29   | 30   | 32   | 15   | 69   |
| Gm04.VB.74  | Gm04 | 39870000 | 39910000 | 40000   | 0  | W | W | W | W | W | W | I | 0   | 2    | 1    | 2    | 2    | 0    | 21   |
| Gm04.VB.75  | Gm04 | 39910000 | 40440000 | 530000  | 12 | W | W | S | W | W | W | I | 67  | 86   | 536  | 78   | 74   | 52   | 610  |
| Gm04.VB.76  | Gm04 | 40440000 | 40640000 | 200000  | 8  | W | W | W | W | W | W | I | 13  | 30   | 34   | 33   | 28   | 21   | 989  |
| Gm04.VB.77  | Gm04 | 40640000 | 40650000 | 10000   | 0  | W | W | S | W | W | W | I | 0   | 2    | 19   | 2    | 1    | 0    | 42   |
| Gm04.VB.78  | Gm04 | 40650000 | 40850000 | 200000  | 9  | W | W | W | W | W | W | I | 24  | 42   | 42   | 46   | 45   | 24   | 606  |
| Gm04.VB.79  | Gm04 | 40850000 | 41060000 | 210000  | 10 | W | B | W | B | B | W | I | 33  | 962  | 32   | 939  | 892  | 19   | 669  |
| Gm04.VB.80  | Gm04 | 41060000 | 41080000 | 20000   | 1  | W | W | W | W | W | W | I | 0   | 7    | 0    | 7    | 5    | 0    | 46   |
| Gm04.VB.81  | Gm04 | 41080000 | 41200000 | 120000  | 9  | W | W | W | W | W | W | I | 1   | 7    | 3    | 8    | 7    | 1    | 626  |
| Gm04.VB.82  | Gm04 | 41200000 | 42300000 | 1100000 | 51 | W | B | W | B | B | W | I | 41  | 6574 | 41   | 6503 | 6272 | 36   | 3761 |
| Gm04.VB.83  | Gm04 | 42300000 | 42790000 | 490000  | 29 | W | W | W | W | W | W | I | 12  | 21   | 12   | 16   | 22   | 11   | 1630 |
| Gm04.VB.84  | Gm04 | 42790000 | 43060000 | 270000  | 20 | W | B | W | W | B | W | I | 22  | 1202 | 22   | 22   | 1098 | 20   | 1088 |
| Gm04.VB.85  | Gm04 | 43060000 | 43640000 | 580000  | 44 | W | W | W | W | W | W | I | 30  | 37   | 26   | 23   | 27   | 25   | 1493 |
| Gm04.VB.86  | Gm04 | 43640000 | 44390000 | 750000  | 58 | W | W | S | S | W | W | I | 58  | 79   | 3263 | 3196 | 50   | 47   | 2061 |
| Gm04.VB.87  | Gm04 | 44390000 | 44720000 | 330000  | 32 | W | W | W | W | W | W | I | 50  | 58   | 56   | 49   | 43   | 40   | 784  |
| Gm04.VB.88  | Gm04 | 44720000 | 44800000 | 80000   | 7  | W | B | W | B | W | W | I | 0   | 184  | 0    | 181  | 1    | 0    | 178  |
| Gm04.VB.89  | Gm04 | 44800000 | 45020000 | 220000  | 19 | W | W | W | W | W | W | I | 3   | 17   | 2    | 18   | 4    | 9    | 732  |
| Gm04.VB.90  | Gm04 | 45020000 | 45410000 | 390000  | 36 | W | B | W | B | W | H | I | 14  | 1823 | 16   | 1784 | 19   | 1209 | 1209 |
| Gm04.VB.91  | Gm04 | 45410000 | 45510000 | 100000  | 11 | W | W | W | W | W | W | I | 11  | 17   | 14   | 15   | 10   | 14   | 264  |
| Gm04.VB.92  | Gm04 | 45510000 | 45620000 | 110000  | 11 | W | W | S | S | W | W | I | 10  | 9    | 260  | 261  | 10   | 10   | 333  |
| Gm04.VB.93  | Gm04 | 45620000 | 45930000 | 310000  | 31 | W | W | W | W | W | W | I | 15  | 29   | 24   | 24   | 25   | 25   | 772  |
| Gm04.VB.94  | Gm04 | 45930000 | 45980000 | 50000   | 2  | W | B | W | W | W | W | I | 4   | 175  | 4    | 4    | 5    | 4    | 137  |
| Gm04.VB.95  | Gm04 | 45980000 | 46080000 | 100000  | 8  | W | B | W | W | D | D | I | 22  | 334  | 20   | 20   | 265  | 265  | 194  |
| Gm04.VB.96  | Gm04 | 46080000 | 46210000 | 130000  | 14 | W | B | W | W | W | W | I | 3   | 246  | 3    | 3    | 17   | 15   | 205  |
| Gm04.VB.97  | Gm04 | 46210000 | 46880000 | 670000  | 76 | W | B | W | W | D | D | I | 46  | 2917 | 50   | 42   | 2653 | 2540 | 1697 |
| Gm04.VB.98  | Gm04 | 46880000 | 46980000 | 100000  | 12 | W | B | W | W | W | W | I | 0   | 304  | 0    | 0    | 2    | 2    | 122  |
| Gm04.VB.99  | Gm04 | 46980000 | 46990000 | 10000   | 0  | W | W | W | W | W | W | I | 0   | 2    | 0    | 0    | 0    | 0    | 19   |
| Gm04.VB.100 | Gm04 | 46990000 | 47120000 | 130000  | 9  | W | W | W | W | D | H | I | 5   | 9    | 5    | 5    | 476  | 407  | 290  |
| Gm04.VB.101 | Gm04 | 47120000 | 47380000 | 260000  | 28 | W | B | W | W | D | H | I | 4   | 917  | 4    | 3    | 501  | 417  | 589  |
| Gm04.VB.102 | Gm04 | 47380000 | 47530000 | 150000  | 15 | W | W | W | W | D | H | I | 14  | 19   | 14   | 13   | 260  | 193  | 218  |
| Gm04.VB.103 | Gm04 | 47530000 | 47760000 | 230000  | 23 | W | B | W | W | B | H | I | 2   | 786  | 2    | 2    | 729  | 539  | 346  |
| Gm04.VB.104 | Gm04 | 47760000 | 47960000 | 200000  | 16 | W | W | W | W | W | H | I | 9   | 18   | 10   | 9    | 16   | 501  | 316  |
| Gm04.VB.105 | Gm04 | 47960000 | 48230000 | 270000  | 26 | W | B | W | W | B | H | I | 17  | 1213 | 17   | 17   | 1111 | 566  | 830  |
| Gm04.VB.106 | Gm04 | 48230000 | 48370000 | 140000  | 15 | W | W | W | W | W | H | I | 0   | 18   | 0    | 0    | 15   | 342  | 532  |
| Gm04.VB.107 | Gm04 | 48370000 | 48470000 | 100000  | 13 | W | B | W | W | B | H | I | 3   | 411  | 0    | 2    | 373  | 42   | 270  |
| Gm04.VB.108 | Gm04 | 48470000 | 48770000 | 300000  | 29 | W | W | W | W | W | W | I | 11  | 28   | 14   | 11   | 29   | 33   | 690  |
| Gm04.VB.109 | Gm04 | 48770000 | 48880000 | 110000  | 10 | W | B | W | W | B | H | I | 2   | 357  | 2    | 2    | 318  | 200  | 343  |
| Gm04.VB.110 | Gm04 | 48880000 | 48990000 | 110000  | 14 | W | W | W | W | W | H | I | 8   | 15   | 9    | 5    | 14   | 369  | 198  |
| Gm04.VB.111 | Gm04 | 48990000 | 49100000 | 110000  | 14 | W | B | W | W | B | W | W | 0   | 330  | 0    | 0    | 322  | 4    | 41   |
| Gm04.VB.112 | Gm04 | 49100000 | 49240000 | 140000  | 9  | W | W | W | W | W | W | W | 6   | 15   | 6    | 6    | 11   | 11   | 42   |
| Gm04.VB.113 | Gm04 | 49240000 | 49243852 | 3852    | 1  | W | W | W | W | W | W | I | 0   | 0    | 0    | 0    | 0    | 1    | 2    |
| Gm05.VB.1   | Gm05 | 0        | 380000   | 380000  | 43 | W | B | W | B | W | W | I | 10  | 442  | 12   | 441  | 8    | 13   | 911  |
| Gm05.VB.2   | Gm05 | 380000   | 420000   | 40000   | 4  | W | B | W | B | W | B | I | 0   | 138  | 0    | 141  | 0    | 135  | 112  |
| Gm05.VB.3   | Gm05 | 420000   | 660000   | 240000  | 27 | W | W | W | W | W | H | I | 7   | 15   | 3    | 13   | 2    | 477  | 386  |
| Gm05.VB.4   | Gm05 | 660000   | 710000   | 50000   | 4  | W | B | W | B | W | H | I | 12  | 189  | 12   | 183  | 12   | 224  | 155  |
| Gm05.VB.5   | Gm05 | 710000   | 860000   | 150000  | 17 | W | W | W | W | W | H | I | 14  | 27   | 14   | 27   | 13   | 176  | 366  |
| Gm05.VB.6   | Gm05 | 860000   | 1170000  | 310000  | 29 | W | B | W | B | W | H | I | 5   | 986  | 5    | 970  | 5    | 912  | 820  |
| Gm05.VB.7   | Gm05 | 1170000  | 1240000  | 70000   | 9  | W | B | W | W | W | H | I | 0   | 332  | 0    | 0    | 0    | 145  | 194  |
| Gm05.VB.8   | Gm05 | 1240000  | 1530000  | 290000  | 30 | W | B | W | W | W | W | I | 25  | 1790 | 23   | 27   | 13   | 26   | 928  |
| Gm05.VB.9   | Gm05 | 1530000  | 1610000  | 80000   | 8  | W | B | W | W | W | H | I | 2   | 290  | 1    | 2    | 2    | 337  | 243  |
| Gm05.VB.10  | Gm05 | 1610000  | 1790000  | 180000  | 20 | W | B | W | W | W | W | I | 1   | 860  | 0    | 0    | 0    | 6    | 391  |
| Gm05.VB.11  | Gm05 | 1790000  | 1970000  | 180000  | 12 | W | W | W | W | W | H | I | 15  | 23   | 15   | 13   | 10   | 428  | 466  |
| Gm05.VB.12  | Gm05 | 1970000  | 2070000  | 100000  | 12 | W | B | W | W | W | H | I | 2   | 381  | 2    | 2    | 2    | 370  | 286  |
| Gm05.VB.13  | Gm05 | 2070000  | 2090000  | 20000   | 1  | W | B | W | W | W | W | I | 0   | 79   | 0    | 0    | 0    | 1    | 82   |
| Gm05.VB.14  | Gm05 | 2090000  | 2640000  | 550000  | 61 | W | W | W | W | W | W | I | 44  | 66   | 42   | 42   | 41   | 59   | 1330 |
| Gm05.VB.15  | Gm05 | 2640000  | 2720000  | 80000   | 7  | W | B | W | W | W | B | I | 12  | 449  | 15   | 12   | 13   | 413  | 144  |
| Gm05.VB.16  | Gm05 | 2720000  | 2950000  | 230000  | 20 | W | W | W | W | W | W | I | 5   | 18   | 5    | 5    | 5    | 15   | 605  |
| Gm05.VB.17  | Gm05 | 2950000  | 2970000  | 20000   | 4  | W | B | W | W | W | B | I | 3   | 104  | 3    | 2    | 2    | 89   | 20   |
| Gm05.VB.18  | Gm05 | 2970000  | 3410000  | 440000  | 39 | W | W | W | W | W | W | I | 49  | 66   | 51   | 49   | 47   | 60   | 1233 |
| Gm05.VB.19  | Gm05 | 3410000  | 3740000  | 330000  | 25 | W | B | W | W | B | B | I | 57  | 2278 | 49   | 40   | 2153 | 2176 | 1177 |
| Gm05.VB.20  | Gm05 | 3740000  | 3880000  | 140000  | 11 | W | W | W | W | W | W | I | 16  | 25   | 17   | 18   | 12   | 21   | 382  |
| Gm05.VB.21  | Gm05 | 3880000  | 3910000  | 30000   | 2  | W | B | W | W | W | B | I | 0   | 90   | 0    | 0    | 0    | 86   | 74   |
| Gm05.VB.22  | Gm05 | 3910000  | 5070000  | 1160000 | 53 | W | W | W | W | W | W | I | 135 | 175  | 135  | 119  | 127  | 142  | 3898 |
| Gm05.VB.23  | Gm05 | 5070000  | 5140000  | 70000   | 7  | W | W | S | S | S | W | I | 19  | 21   | 138  | 142  | 137  | 16   | 328  |
| Gm05.VB.24  | Gm05 | 5140000  | 5700000  | 560000  | 25 | W | W | W | W | W | W | I | 55  | 86   | 98   | 103  | 97   | 74   | 1184 |
| Gm05.VB.25  | Gm05 | 5700000  | 5710000  | 10000   | 1  | W | W | W | W | D | W | I | 0   | 1    | 4    | 4    | 5    | 1    | 35   |
| Gm05.VB.26  | Gm05 | 5710000  | 5750000  | 40000   | 1  | W | W | S | S | D | W | I | 5   | 6    | 365  | 363  | 327  | 4    | 147  |
| Gm05.VB.27  | Gm05 | 5750000  | 7450000  | 1700000 | 33 | W | W | W | W | W | W | I | 68  | 120  | 166  | 143  | 156  | 97   | 6906 |
| Gm05.VB.28  | Gm05 | 7450000  | 7510000  | 60000   | 6  | W | B | W | B | W | W | I | 1   | 410  | 1    | 414  | 1    | 5    | 229  |
| Gm05.VB.29  | Gm05 | 7510000  | 7900000  | 390000  | 42 | W | B | W | B | W | H | I | 5   | 980  | 4    | 947  | 4    | 963  | 815  |

|             |      |          |          |          |     |   |   |   |   |   |   |   |     |      |      |      |      |      |       |
|-------------|------|----------|----------|----------|-----|---|---|---|---|---|---|---|-----|------|------|------|------|------|-------|
| Gm05.VB.30  | Gm05 | 7900000  | 8000000  | 100000   | 9   | W | W | W | W | W | H | I | 2   | 12   | 2    | 13   | 2    | 200  | 182   |
| Gm05.VB.31  | Gm05 | 8000000  | 8200000  | 200000   | 14  | W | B | W | B | W | H | I | 39  | 346  | 41   | 341  | 36   | 820  | 465   |
| Gm05.VB.32  | Gm05 | 8200000  | 8250000  | 50000    | 4   | W | B | W | B | W | W | I | 22  | 148  | 28   | 138  | 19   | 29   | 108   |
| Gm05.VB.33  | Gm05 | 8250000  | 8470000  | 220000   | 26  | W | W | W | W | W | W | I | 18  | 26   | 22   | 30   | 16   | 24   | 540   |
| Gm05.VB.34  | Gm05 | 8470000  | 8520000  | 50000    | 2   | W | B | W | B | W | W | I | 0   | 150  | 0    | 147  | 0    | 1    | 106   |
| Gm05.VB.35  | Gm05 | 8520000  | 8580000  | 60000    | 5   | W | W | W | W | W | W | I | 0   | 0    | 0    | 0    | 0    | 3    | 152   |
| Gm05.VB.36  | Gm05 | 8580000  | 8920000  | 340000   | 34  | W | W | W | W | W | H | I | 18  | 20   | 16   | 23   | 10   | 570  | 723   |
| Gm05.VB.37  | Gm05 | 8920000  | 8960000  | 40000    | 7   | W | W | W | W | W | W | I | 0   | 0    | 0    | 0    | 0    | 1    | 63    |
| Gm05.VB.38  | Gm05 | 8960000  | 9120000  | 160000   | 17  | W | B | W | B | W | W | I | 0   | 313  | 0    | 322  | 0    | 3    | 325   |
| Gm05.VB.39  | Gm05 | 9120000  | 22160000 | 13040000 | 121 | W | W | W | W | W | W | I | 699 | 1190 | 1953 | 1862 | 1885 | 972  | 17695 |
| Gm05.VB.40  | Gm05 | 22160000 | 22200000 | 40000    | 0   | W | W | W | W | D | W | I | 26  | 25   | 37   | 43   | 37   | 36   | 68    |
| Gm05.VB.41  | Gm05 | 22200000 | 26660000 | 4460000  | 56  | W | W | W | W | W | W | I | 240 | 381  | 604  | 564  | 629  | 329  | 11391 |
| Gm05.VB.42  | Gm05 | 26660000 | 26730000 | 70000    | 6   | W | W | S | S | S | W | I | 0   | 5    | 413  | 404  | 375  | 1    | 173   |
| Gm05.VB.43  | Gm05 | 26730000 | 27030000 | 300000   | 11  | W | W | W | W | D | W | I | 3   | 6    | 23   | 23   | 2049 | 7    | 1286  |
| Gm05.VB.44  | Gm05 | 27030000 | 27210000 | 180000   | 2   | W | W | W | W | W | W | I | 13  | 18   | 23   | 24   | 20   | 14   | 388   |
| Gm05.VB.45  | Gm05 | 27210000 | 27350000 | 140000   | 6   | W | W | S | S | W | W | I | 4   | 11   | 235  | 231  | 13   | 9    | 449   |
| Gm05.VB.46  | Gm05 | 27350000 | 27440000 | 90000    | 3   | W | W | S | S | D | W | I | 47  | 39   | 782  | 756  | 551  | 42   | 269   |
| Gm05.VB.47  | Gm05 | 27440000 | 27530000 | 90000    | 3   | W | W | W | W | D | W | I | 0   | 4    | 2    | 2    | 329  | 2    | 443   |
| Gm05.VB.48  | Gm05 | 27530000 | 28690000 | 1160000  | 35  | W | B | W | W | B | B | I | 110 | 6984 | 141  | 135  | 6656 | 6698 | 5139  |
| Gm05.VB.49  | Gm05 | 28690000 | 28900000 | 210000   | 8   | W | W | S | S | W | W | I | 22  | 26   | 1311 | 1267 | 25   | 25   | 1259  |
| Gm05.VB.50  | Gm05 | 28900000 | 29140000 | 240000   | 3   | W | W | W | W | W | W | I | 56  | 62   | 79   | 69   | 68   | 54   | 875   |
| Gm05.VB.51  | Gm05 | 29140000 | 29150000 | 10000    | 1   | W | B | W | W | W | W | I | 0   | 34   | 0    | 0    | 0    | 2    | 24    |
| Gm05.VB.52  | Gm05 | 29150000 | 29340000 | 190000   | 3   | W | B | W | W | W | H | I | 20  | 517  | 35   | 26   | 32   | 119  | 375   |
| Gm05.VB.53  | Gm05 | 29340000 | 29600000 | 260000   | 12  | W | B | W | W | W | W | I | 19  | 1923 | 39   | 38   | 32   | 27   | 748   |
| Gm05.VB.54  | Gm05 | 29600000 | 30630000 | 1030000  | 27  | W | W | W | W | W | W | I | 31  | 42   | 120  | 113  | 93   | 92   | 3731  |
| Gm05.VB.55  | Gm05 | 30630000 | 30730000 | 100000   | 7   | W | W | W | W | W | H | I | 26  | 25   | 32   | 35   | 30   | 365  | 331   |
| Gm05.VB.56  | Gm05 | 30730000 | 30810000 | 80000    | 9   | W | W | S | S | D | H | I | 7   | 7    | 207  | 199  | 164  | 184  | 225   |
| Gm05.VB.57  | Gm05 | 30810000 | 30920000 | 110000   | 5   | W | W | W | W | W | W | I | 3   | 2    | 2    | 2    | 4    | 5    | 122   |
| Gm05.VB.58  | Gm05 | 30920000 | 31100000 | 180000   | 14  | W | W | S | S | S | H | I | 3   | 2    | 642  | 628  | 610  | 478  | 376   |
| Gm05.VB.59  | Gm05 | 31100000 | 31200000 | 100000   | 10  | W | W | S | S | S | W | I | 5   | 5    | 581  | 556  | 535  | 11   | 329   |
| Gm05.VB.60  | Gm05 | 31200000 | 31300000 | 100000   | 5   | W | W | S | S | S | S | I | 15  | 15   | 523  | 506  | 489  | 550  | 425   |
| Gm05.VB.61  | Gm05 | 31300000 | 31410000 | 110000   | 10  | W | W | W | W | W | H | I | 4   | 4    | 14   | 15   | 12   | 583  | 148   |
| Gm05.VB.62  | Gm05 | 31410000 | 31730000 | 320000   | 33  | W | W | S | S | S | H | I | 39  | 31   | 1062 | 1038 | 988  | 676  | 921   |
| Gm05.VB.63  | Gm05 | 31730000 | 31890000 | 160000   | 12  | W | B | S | S | S | H | I | 2   | 451  | 838  | 798  | 753  | 470  | 392   |
| Gm05.VB.64  | Gm05 | 31890000 | 31940000 | 50000    | 3   | W | B | W | W | W | W | I | 2   | 72   | 3    | 3    | 2    | 3    | 93    |
| Gm05.VB.65  | Gm05 | 31940000 | 32040000 | 100000   | 11  | W | W | W | W | W | W | I | 1   | 5    | 5    | 5    | 5    | 8    | 387   |
| Gm05.VB.66  | Gm05 | 32040000 | 32090000 | 50000    | 5   | W | W | W | W | W | H | I | 4   | 7    | 4    | 4    | 4    | 79   | 119   |
| Gm05.VB.67  | Gm05 | 32090000 | 32160000 | 70000    | 5   | W | B | W | W | W | H | I | 3   | 329  | 8    | 8    | 7    | 78   | 234   |
| Gm05.VB.68  | Gm05 | 32160000 | 32320000 | 160000   | 14  | W | W | W | W | W | W | I | 3   | 9    | 7    | 4    | 5    | 6    | 279   |
| Gm05.VB.69  | Gm05 | 32320000 | 32340000 | 20000    | 2   | W | B | B | B | B | B | I | 4   | 98   | 90   | 91   | 86   | 84   | 51    |
| Gm05.VB.70  | Gm05 | 32340000 | 32490000 | 150000   | 20  | W | B | W | W | W | H | I | 4   | 158  | 12   | 9    | 12   | 95   | 385   |
| Gm05.VB.71  | Gm05 | 32490000 | 32810000 | 320000   | 29  | W | B | B | B | B | H | I | 33  | 910  | 917  | 894  | 843  | 597  | 862   |
| Gm05.VB.72  | Gm05 | 32810000 | 33060000 | 250000   | 19  | W | B | W | B | W | B | I | 39  | 889  | 45   | 858  | 32   | 817  | 421   |
| Gm05.VB.73  | Gm05 | 33060000 | 33330000 | 270000   | 18  | W | B | S | B | S | B | I | 13  | 669  | 1289 | 648  | 1138 | 625  | 751   |
| Gm05.VB.74  | Gm05 | 33330000 | 34730000 | 1400000  | 140 | W | W | S | W | S | W | I | 65  | 71   | 5891 | 68   | 5120 | 86   | 3421  |
| Gm05.VB.75  | Gm05 | 34730000 | 34790000 | 60000    | 6   | W | W | S | W | D | H | I | 4   | 3    | 143  | 4    | 117  | 207  | 174   |
| Gm05.VB.76  | Gm05 | 34790000 | 34830000 | 40000    | 4   | W | W | W | W | W | W | I | 1   | 8    | 9    | 8    | 8    | 2    | 38    |
| Gm05.VB.77  | Gm05 | 34830000 | 34890000 | 60000    | 6   | W | B | B | B | B | W | I | 3   | 208  | 209  | 211  | 199  | 7    | 140   |
| Gm05.VB.78  | Gm05 | 34890000 | 35000000 | 110000   | 9   | W | B | B | B | B | H | I | 14  | 583  | 602  | 557  | 526  | 456  | 272   |
| Gm05.VB.79  | Gm05 | 35000000 | 35940000 | 940000   | 98  | W | W | S | W | S | H | I | 60  | 74   | 4234 | 72   | 3805 | 3367 | 2504  |
| Gm05.VB.80  | Gm05 | 35940000 | 36000000 | 60000    | 9   | W | W | W | W | W | H | I | 8   | 6    | 10   | 8    | 5    | 140  | 136   |
| Gm05.VB.81  | Gm05 | 36000000 | 36140000 | 140000   | 17  | W | W | W | W | W | W | I | 6   | 9    | 14   | 9    | 13   | 21   | 339   |
| Gm05.VB.82  | Gm05 | 36140000 | 36150000 | 10000    | 1   | W | W | S | W | W | H | I | 0   | 0    | 5    | 0    | 4    | 7    | 34    |
| Gm05.VB.83  | Gm05 | 36150000 | 36180000 | 30000    | 1   | W | W | S | W | S | H | I | 12  | 13   | 163  | 13   | 156  | 28   | 162   |
| Gm05.VB.84  | Gm05 | 36180000 | 36200000 | 20000    | 0   | W | W | W | W | W | W | I | 0   | 0    | 8    | 1    | 8    | 0    | 42    |
| Gm05.VB.85  | Gm05 | 36200000 | 36320000 | 120000   | 16  | W | W | W | W | W | W | I | 2   | 13   | 9    | 13   | 10   | 11   | 374   |
| Gm05.VB.86  | Gm05 | 36320000 | 36610000 | 290000   | 30  | W | W | S | W | S | W | I | 14  | 28   | 1222 | 28   | 1106 | 25   | 712   |
| Gm05.VB.87  | Gm05 | 36610000 | 36930000 | 320000   | 38  | W | W | S | W | S | H | I | 10  | 51   | 826  | 52   | 747  | 423  | 659   |
| Gm05.VB.88  | Gm05 | 36930000 | 37160000 | 230000   | 27  | W | B | S | B | S | H | I | 17  | 1245 | 619  | 1203 | 555  | 649  | 626   |
| Gm05.VB.89  | Gm05 | 37160000 | 38110000 | 950000   | 104 | W | B | W | B | W | H | I | 56  | 4145 | 61   | 4100 | 59   | 3370 | 2574  |
| Gm05.VB.90  | Gm05 | 38110000 | 38120000 | 10000    | 1   | W | W | W | W | W | H | W | 0   | 0    | 1    | 0    | 1    | 15   | 4     |
| Gm05.VB.91  | Gm05 | 38120000 | 38240000 | 120000   | 12  | W | W | W | W | W | W | I | 0   | 2    | 0    | 0    | 2    | 7    | 162   |
| Gm05.VB.92  | Gm05 | 38240000 | 38280000 | 40000    | 6   | W | W | W | W | W | H | I | 4   | 6    | 4    | 4    | 6    | 24   | 153   |
| Gm05.VB.93  | Gm05 | 38280000 | 38390000 | 110000   | 15  | W | W | W | W | W | W | I | 3   | 10   | 3    | 2    | 5    | 17   | 181   |
| Gm05.VB.94  | Gm05 | 38390000 | 38440000 | 50000    | 7   | W | W | W | W | W | H | I | 0   | 2    | 0    | 0    | 2    | 29   | 97    |
| Gm05.VB.95  | Gm05 | 38440000 | 38480000 | 40000    | 5   | W | B | W | W | B | B | I | 0   | 155  | 0    | 0    | 129  | 129  | 59    |
| Gm05.VB.96  | Gm05 | 38480000 | 38580000 | 100000   | 13  | W | W | W | W | W | W | I | 2   | 7    | 2    | 2    | 8    | 5    | 54    |
| Gm05.VB.97  | Gm05 | 38580000 | 38600000 | 20000    | 3   | W | B | W | W | B | B | I | 0   | 46   | 0    | 0    | 37   | 40   | 47    |
| Gm05.VB.98  | Gm05 | 38600000 | 38830000 | 230000   | 26  | W | B | W | W | B | W | I | 10  | 417  | 5    | 5    | 364  | 6    | 442   |
| Gm05.VB.99  | Gm05 | 38830000 | 38980000 | 150000   | 21  | W | W | W | W | W | W | I | 0   | 0    | 0    | 1    | 0    | 0    | 239   |
| Gm05.VB.100 | Gm05 | 38980000 | 38990000 | 10000    | 2   | W | W | W | W | W | H | I | 0   | 1    | 0    | 1    | 1    | 7    | 10    |
| Gm05.VB.101 | Gm05 | 38990000 | 39800000 | 810000   | 89  | W | B | W | B | B | H | I | 21  | 3513 | 24   | 3464 | 3215 | 2610 | 1917  |
| Gm05.VB.102 | Gm05 | 39800000 | 39910000 | 110000   | 12  | W | W | W | W | W | W | I | 7   | 17   | 7    | 17   | 16   | 10   | 147   |
| Gm05.VB.103 | Gm05 | 39910000 | 39990000 | 80000    | 10  | W | B | W | B | B | W | I | 0   | 134  | 0    | 135  | 126  | 7    | 59    |
| Gm05.VB.104 | Gm05 | 39990000 | 40000000 | 10000    | 2   | W | B | W | B | B | H | I | 0   | 58   | 0    | 58   | 51   | 13   | 42    |
| Gm05.VB.105 | Gm05 | 40000000 | 41930000 | 1930000  | 218 | W | B | W | B | W | H | I | 67  | 7409 | 68   | 7325 | 57   | 7031 | 4118  |
| Gm05.VB.106 | Gm05 | 41930000 | 41936504 | 6504     | 0   | W | B | W | B | W | H | I | 5   | 42   | 6    | 42   | 6    | 45   | 7     |
| Gm06.VB.1   | Gm06 | 0        | 610000   | 610000   | 70  | W | W | W | W | W | H | I | 29  | 55   | 51   | 46   | 41   | 1406 | 579   |



|            |      |          |          |         |     |   |   |   |   |   |   |   |     |       |     |       |      |       |       |
|------------|------|----------|----------|---------|-----|---|---|---|---|---|---|---|-----|-------|-----|-------|------|-------|-------|
| Gm06.VB.2  | Gm06 | 610000   | 1620000  | 1010000 | 115 | W | B | W | W | W | H | I | 22  | 3290  | 37  | 34    | 35   | 758   | 1811  |
| Gm06.VB.3  | Gm06 | 1620000  | 1730000  | 110000  | 12  | W | W | W | W | W | W | I | 3   | 13    | 4   | 6     | 6    | 7     | 314   |
| Gm06.VB.4  | Gm06 | 1730000  | 1750000  | 20000   | 1   | W | B | W | W | W | W | I | 0   | 40    | 2   | 2     | 2    | 3     | 19    |
| Gm06.VB.5  | Gm06 | 1750000  | 1820000  | 70000   | 8   | W | B | W | W | W | W | I | 1   | 246   | 2   | 2     | 1    | 9     | 108   |
| Gm06.VB.6  | Gm06 | 1820000  | 1830000  | 10000   | 2   | W | W | W | W | W | W | I | 0   | 0     | 3   | 3     | 3    | 3     | 27    |
| Gm06.VB.7  | Gm06 | 1830000  | 1910000  | 80000   | 7   | W | W | S | S | S | S | I | 10  | 9     | 72  | 73    | 64   | 63    | 77    |
| Gm06.VB.8  | Gm06 | 1910000  | 2060000  | 150000  | 15  | W | W | W | W | W | W | I | 2   | 3     | 19  | 21    | 19   | 15    | 128   |
| Gm06.VB.9  | Gm06 | 2060000  | 2080000  | 20000   | 2   | W | W | S | S | S | W | I | 0   | 4     | 12  | 12    | 10   | 2     | 31    |
| Gm06.VB.10 | Gm06 | 2080000  | 2170000  | 90000   | 9   | W | B | B | B | B | B | I | 1   | 223   | 220 | 217   | 196  | 192   | 186   |
| Gm06.VB.11 | Gm06 | 2170000  | 2620000  | 450000  | 55  | W | W | S | S | D | W | I | 41  | 39    | 716 | 708   | 446  | 43    | 650   |
| Gm06.VB.12 | Gm06 | 2620000  | 3100000  | 480000  | 56  | W | B | W | W | B | H | I | 19  | 1515  | 38  | 38    | 1381 | 838   | 1072  |
| Gm06.VB.13 | Gm06 | 3100000  | 3110000  | 10000   | 1   | W | B | S | S | B | B | I | 0   | 41    | 43  | 48    | 38   | 40    | 21    |
| Gm06.VB.14 | Gm06 | 3110000  | 3240000  | 130000  | 11  | W | B | S | S | B | W | I | 6   | 500   | 528 | 512   | 458  | 5     | 268   |
| Gm06.VB.15 | Gm06 | 3240000  | 3480000  | 240000  | 32  | W | W | S | S | W | W | I | 8   | 13    | 615 | 600   | 10   | 5     | 503   |
| Gm06.VB.16 | Gm06 | 3480000  | 3640000  | 160000  | 20  | W | B | S | S | B | W | I | 3   | 337   | 481 | 459   | 303  | 6     | 328   |
| Gm06.VB.17 | Gm06 | 3640000  | 3780000  | 140000  | 10  | W | W | W | W | W | W | I | 18  | 31    | 19  | 19    | 25   | 18    | 176   |
| Gm06.VB.18 | Gm06 | 3780000  | 3930000  | 150000  | 20  | W | B | W | W | B | W | I | 0   | 479   | 2   | 2     | 440  | 0     | 291   |
| Gm06.VB.19 | Gm06 | 3930000  | 3970000  | 40000   | 4   | W | W | S | S | W | W | I | 8   | 20    | 150 | 151   | 22   | 6     | 69    |
| Gm06.VB.20 | Gm06 | 3970000  | 4090000  | 120000  | 10  | W | W | W | W | W | W | I | 14  | 55    | 36  | 36    | 52   | 13    | 173   |
| Gm06.VB.21 | Gm06 | 4090000  | 4110000  | 20000   | 4   | W | B | S | G | D | W | I | 0   | 32    | 33  | 30    | 27   | 1     | 21    |
| Gm06.VB.22 | Gm06 | 4110000  | 4520000  | 410000  | 46  | W | B | W | W | B | W | I | 27  | 449   | 35  | 32    | 413  | 36    | 539   |
| Gm06.VB.23 | Gm06 | 4520000  | 5020000  | 500000  | 51  | W | W | W | W | W | W | I | 15  | 39    | 18  | 20    | 37   | 18    | 676   |
| Gm06.VB.24 | Gm06 | 5020000  | 5090000  | 70000   | 8   | W | B | W | W | B | H | W | 1   | 281   | 2   | 2     | 260  | 52    | 2     |
| Gm06.VB.25 | Gm06 | 5090000  | 5340000  | 250000  | 27  | W | B | W | W | B | W | W | 31  | 1218  | 31  | 29    | 1051 | 28    | 15    |
| Gm06.VB.26 | Gm06 | 5340000  | 5700000  | 360000  | 40  | W | W | W | W | W | W | W | 28  | 35    | 40  | 39    | 29   | 26    | 7     |
| Gm06.VB.27 | Gm06 | 5700000  | 5950000  | 250000  | 26  | W | W | S | S | W | W | I | 5   | 7     | 648 | 623   | 7    | 5     | 388   |
| Gm06.VB.28 | Gm06 | 5950000  | 6010000  | 60000   | 5   | W | W | W | W | W | W | I | 31  | 35    | 37  | 38    | 34   | 34    | 174   |
| Gm06.VB.29 | Gm06 | 6010000  | 6140000  | 130000  | 16  | W | B | W | W | W | W | I | 1   | 223   | 1   | 1     | 0    | 1     | 150   |
| Gm06.VB.30 | Gm06 | 6140000  | 6260000  | 120000  | 11  | W | W | W | W | W | W | I | 1   | 6     | 5   | 4     | 4    | 1     | 143   |
| Gm06.VB.31 | Gm06 | 6260000  | 6320000  | 60000   | 6   | W | B | W | W | W | W | I | 0   | 35    | 1   | 1     | 1    | 1     | 79    |
| Gm06.VB.32 | Gm06 | 6320000  | 6450000  | 130000  | 16  | W | W | W | W | W | W | I | 7   | 16    | 8   | 7     | 2    | 1     | 199   |
| Gm06.VB.33 | Gm06 | 6450000  | 6670000  | 220000  | 23  | W | B | W | W | W | W | I | 33  | 525   | 35  | 35    | 29   | 30    | 273   |
| Gm06.VB.34 | Gm06 | 6670000  | 6940000  | 270000  | 27  | W | W | W | W | W | W | W | 17  | 31    | 19  | 16    | 18   | 13    | 11    |
| Gm06.VB.35 | Gm06 | 6940000  | 7350000  | 410000  | 32  | W | B | W | W | W | W | I | 8   | 492   | 10  | 10    | 30   | 10    | 177   |
| Gm06.VB.36 | Gm06 | 7350000  | 7360000  | 10000   | 0   | W | B | W | W | B | W | I | 0   | 54    | 0   | 0     | 47   | 0     | 23    |
| Gm06.VB.37 | Gm06 | 7360000  | 8010000  | 650000  | 64  | W | W | W | W | W | W | I | 29  | 68    | 29  | 30    | 41   | 20    | 959   |
| Gm06.VB.38 | Gm06 | 8010000  | 8380000  | 370000  | 36  | W | B | W | W | W | W | I | 15  | 503   | 18  | 13    | 11   | 14    | 503   |
| Gm06.VB.39 | Gm06 | 8380000  | 9010000  | 630000  | 57  | W | W | W | W | W | W | I | 46  | 69    | 48  | 50    | 48   | 41    | 1261  |
| Gm06.VB.40 | Gm06 | 9010000  | 9450000  | 440000  | 48  | W | B | W | W | B | W | I | 25  | 870   | 26  | 26    | 809  | 20    | 681   |
| Gm06.VB.41 | Gm06 | 9450000  | 9550000  | 100000  | 11  | W | W | W | W | W | W | I | 13  | 30    | 15  | 8     | 33   | 15    | 293   |
| Gm06.VB.42 | Gm06 | 9550000  | 9620000  | 70000   | 7   | W | B | W | W | B | W | I | 4   | 56    | 4   | 4     | 53   | 4     | 120   |
| Gm06.VB.43 | Gm06 | 9620000  | 9960000  | 340000  | 27  | W | B | W | W | W | W | I | 14  | 868   | 13  | 14    | 9    | 9     | 696   |
| Gm06.VB.44 | Gm06 | 9960000  | 10100000 | 140000  | 20  | W | W | W | W | W | W | I | 2   | 14    | 2   | 2     | 2    | 2     | 457   |
| Gm06.VB.45 | Gm06 | 10100000 | 10180000 | 80000   | 7   | W | B | W | W | W | W | I | 4   | 102   | 3   | 4     | 2    | 4     | 196   |
| Gm06.VB.46 | Gm06 | 10180000 | 10660000 | 480000  | 46  | W | B | W | W | W | B | I | 32  | 1025  | 33  | 31    | 25   | 961   | 653   |
| Gm06.VB.47 | Gm06 | 10660000 | 10780000 | 120000  | 12  | W | W | W | W | W | H | I | 9   | 15    | 11  | 11    | 10   | 86    | 207   |
| Gm06.VB.48 | Gm06 | 10780000 | 10810000 | 30000   | 1   | W | B | W | W | W | H | I | 3   | 85    | 3   | 2     | 2    | 36    | 47    |
| Gm06.VB.49 | Gm06 | 10810000 | 11140000 | 330000  | 40  | W | B | W | W | W | W | I | 11  | 918   | 10  | 10    | 10   | 13    | 418   |
| Gm06.VB.50 | Gm06 | 11140000 | 11300000 | 160000  | 22  | W | W | W | W | W | W | I | 11  | 9     | 10  | 12    | 2    | 7     | 393   |
| Gm06.VB.51 | Gm06 | 11300000 | 11500000 | 200000  | 22  | W | B | W | W | W | W | I | 4   | 409   | 4   | 7     | 5    | 5     | 440   |
| Gm06.VB.52 | Gm06 | 11500000 | 11620000 | 120000  | 14  | W | W | W | W | W | W | I | 0   | 13    | 0   | 0     | 0    | 2     | 386   |
| Gm06.VB.53 | Gm06 | 11620000 | 11960000 | 340000  | 35  | W | B | W | W | W | W | I | 16  | 551   | 17  | 15    | 15   | 14    | 766   |
| Gm06.VB.54 | Gm06 | 11960000 | 12040000 | 80000   | 6   | W | B | B | B | B | W | I | 1   | 108   | 120 | 120   | 116  | 6     | 138   |
| Gm06.VB.55 | Gm06 | 12040000 | 12120000 | 80000   | 8   | W | W | W | W | W | W | I | 5   | 10    | 11  | 11    | 7    | 7     | 208   |
| Gm06.VB.56 | Gm06 | 12120000 | 12210000 | 90000   | 10  | W | W | W | W | W | H | I | 0   | 6     | 4   | 4     | 4    | 105   | 225   |
| Gm06.VB.57 | Gm06 | 12210000 | 12550000 | 340000  | 39  | W | B | B | B | B | H | I | 12  | 964   | 978 | 967   | 834  | 613   | 875   |
| Gm06.VB.58 | Gm06 | 12550000 | 12580000 | 30000   | 5   | W | W | W | W | W | H | I | 0   | 2     | 2   | 2     | 2    | 42    | 39    |
| Gm06.VB.59 | Gm06 | 12580000 | 12960000 | 380000  | 36  | W | W | W | W | W | W | I | 7   | 19    | 20  | 20    | 19   | 13    | 1071  |
| Gm06.VB.60 | Gm06 | 12960000 | 13010000 | 50000   | 5   | W | B | W | W | W | B | I | 0   | 42    | 4   | 4     | 4    | 42    | 101   |
| Gm06.VB.61 | Gm06 | 13010000 | 13170000 | 160000  | 12  | W | W | W | W | W | W | I | 0   | 12    | 0   | 0     | 0    | 10    | 406   |
| Gm06.VB.62 | Gm06 | 13170000 | 13190000 | 20000   | 3   | W | B | W | W | W | W | I | 0   | 66    | 0   | 0     | 0    | 0     | 42    |
| Gm06.VB.63 | Gm06 | 13190000 | 13230000 | 40000   | 4   | W | B | W | W | W | H | I | 1   | 248   | 1   | 1     | 1    | 90    | 63    |
| Gm06.VB.64 | Gm06 | 13230000 | 13340000 | 110000  | 10  | W | B | W | W | W | W | I | 0   | 376   | 0   | 0     | 0    | 0     | 302   |
| Gm06.VB.65 | Gm06 | 13340000 | 13970000 | 630000  | 53  | W | B | W | W | W | H | I | 36  | 3052  | 32  | 29    | 23   | 1829  | 1772  |
| Gm06.VB.66 | Gm06 | 13970000 | 14160000 | 190000  | 19  | W | B | W | W | W | W | I | 19  | 645   | 25  | 24    | 14   | 25    | 534   |
| Gm06.VB.67 | Gm06 | 14160000 | 14430000 | 270000  | 25  | W | B | W | W | W | B | I | 26  | 962   | 27  | 20    | 21   | 886   | 523   |
| Gm06.VB.68 | Gm06 | 14430000 | 15210000 | 780000  | 55  | W | W | W | W | W | H | I | 86  | 66    | 73  | 66    | 53   | 651   | 1706  |
| Gm06.VB.69 | Gm06 | 15210000 | 15680000 | 470000  | 29  | W | B | W | W | W | H | I | 20  | 1490  | 19  | 20    | 14   | 1199  | 1036  |
| Gm06.VB.70 | Gm06 | 15680000 | 15710000 | 30000   | 1   | W | B | W | W | W | W | I | 5   | 88    | 5   | 5     | 5    | 11    | 55    |
| Gm06.VB.71 | Gm06 | 15710000 | 16380000 | 670000  | 48  | W | W | W | W | W | W | I | 43  | 50    | 43  | 40    | 37   | 39    | 2254  |
| Gm06.VB.72 | Gm06 | 16380000 | 16750000 | 370000  | 27  | W | B | W | B | W | B | I | 43  | 1819  | 43  | 1776  | 30   | 1696  | 1124  |
| Gm06.VB.73 | Gm06 | 16750000 | 17020000 | 270000  | 17  | W | B | W | B | W | W | I | 1   | 142   | 1   | 138   | 1    | 16    | 445   |
| Gm06.VB.74 | Gm06 | 17020000 | 25290000 | 8270000 | 183 | W | B | W | B | W | B | I | 315 | 28766 | 305 | 28595 | 247  | 28408 | 20185 |
| Gm06.VB.75 | Gm06 | 25290000 | 25300000 | 10000   | 0   | W | B | W | G | W | W | W | 17  | 24    | 15  | 18    | 12   | 8     | 4     |
| Gm06.VB.76 | Gm06 | 25300000 | 25450000 | 150000  | 0   | W | W | W | W | W | W | W | 10  | 27    | 12  | 27    | 7    | 12    | 7     |
| Gm06.VB.77 | Gm06 | 25450000 | 25470000 | 20000   | 0   | W | W | W | W | W | W | I | 8   | 3     | 5   | 6     | 3    | 6     | 10    |
| Gm06.VB.78 | Gm06 | 25470000 | 25810000 | 340000  | 3   | W | B | W | B | W | B | I | 22  | 491   | 24  | 488   | 35   | 504   | 420   |
| Gm06.VB.79 | Gm06 | 25810000 | 25930000 | 120000  | 1   | W | W | W | W | W | W | I | 1   | 10    | 1   | 9     | 1    | 18    | 203   |

|             |      |          |          |         |     |   |   |   |   |   |   |   |     |       |      |       |      |       |       |
|-------------|------|----------|----------|---------|-----|---|---|---|---|---|---|---|-----|-------|------|-------|------|-------|-------|
| Gm06.VB.80  | Gm06 | 25930000 | 28660000 | 2730000 | 21  | W | B | W | B | W | B | I | 128 | 3962  | 143  | 3933  | 92   | 4016  | 3209  |
| Gm06.VB.81  | Gm06 | 28660000 | 28960000 | 300000  | 7   | W | W | W | W | W | W | I | 7   | 37    | 5    | 38    | 5    | 34    | 615   |
| Gm06.VB.82  | Gm06 | 28960000 | 29550000 | 590000  | 3   | W | B | W | B | W | B | I | 20  | 284   | 17   | 265   | 22   | 290   | 638   |
| Gm06.VB.83  | Gm06 | 29550000 | 31110000 | 1560000 | 10  | W | W | W | W | W | W | I | 303 | 866   | 296  | 841   | 299  | 852   | 1112  |
| Gm06.VB.84  | Gm06 | 31110000 | 31630000 | 520000  | 0   | W | B | W | G | W | H | W | 188 | 455   | 196  | 425   | 185  | 423   | 293   |
| Gm06.VB.85  | Gm06 | 31630000 | 32380000 | 750000  | 4   | W | W | W | W | W | W | W | 56  | 253   | 55   | 257   | 66   | 244   | 194   |
| Gm06.VB.86  | Gm06 | 32380000 | 32540000 | 160000  | 0   | W | B | W | B | W | B | W | 2   | 87    | 2    | 85    | 2    | 90    | 61    |
| Gm06.VB.87  | Gm06 | 32540000 | 33200000 | 660000  | 1   | W | W | W | W | W | W | W | 43  | 213   | 52   | 212   | 49   | 224   | 176   |
| Gm06.VB.88  | Gm06 | 33200000 | 33900000 | 700000  | 9   | W | B | W | B | W | B | I | 38  | 1856  | 39   | 1829  | 36   | 1870  | 1437  |
| Gm06.VB.89  | Gm06 | 33900000 | 37020000 | 3120000 | 39  | W | W | W | W | W | W | I | 148 | 334   | 161  | 321   | 125  | 338   | 11891 |
| Gm06.VB.90  | Gm06 | 37020000 | 37160000 | 140000  | 2   | W | W | W | W | W | H | I | 6   | 11    | 12   | 6     | 12   | 129   | 112   |
| Gm06.VB.91  | Gm06 | 37160000 | 37680000 | 520000  | 6   | W | W | W | W | W | W | I | 16  | 59    | 24   | 62    | 19   | 63    | 1275  |
| Gm06.VB.92  | Gm06 | 37680000 | 38300000 | 620000  | 15  | W | B | W | B | W | B | I | 30  | 1952  | 27   | 1939  | 30   | 1980  | 2994  |
| Gm06.VB.93  | Gm06 | 38300000 | 40690000 | 2390000 | 42  | W | W | W | W | W | W | I | 70  | 205   | 81   | 204   | 67   | 203   | 7516  |
| Gm06.VB.94  | Gm06 | 40690000 | 40840000 | 150000  | 3   | W | B | W | B | W | B | I | 31  | 826   | 38   | 810   | 33   | 825   | 1184  |
| Gm06.VB.95  | Gm06 | 40840000 | 41380000 | 540000  | 22  | W | W | W | W | W | W | I | 62  | 93    | 54   | 87    | 34   | 69    | 1962  |
| Gm06.VB.96  | Gm06 | 41380000 | 41480000 | 100000  | 5   | W | B | W | B | W | B | I | 0   | 869   | 0    | 865   | 0    | 826   | 390   |
| Gm06.VB.97  | Gm06 | 41480000 | 42750000 | 1270000 | 47  | W | W | W | W | W | W | I | 68  | 132   | 59   | 140   | 58   | 141   | 4685  |
| Gm06.VB.98  | Gm06 | 42750000 | 43460000 | 710000  | 19  | W | B | W | B | W | B | I | 31  | 3060  | 47   | 2954  | 43   | 2930  | 3326  |
| Gm06.VB.99  | Gm06 | 43460000 | 43800000 | 340000  | 14  | W | W | W | W | W | W | I | 3   | 19    | 5    | 20    | 3    | 19    | 1517  |
| Gm06.VB.100 | Gm06 | 43800000 | 44910000 | 1110000 | 58  | W | B | W | B | W | B | I | 81  | 7226  | 80   | 6933  | 69   | 6593  | 2701  |
| Gm06.VB.101 | Gm06 | 44910000 | 44930000 | 20000   | 2   | W | B | W | W | W | B | I | 0   | 116   | 0    | 3     | 0    | 116   | 68    |
| Gm06.VB.102 | Gm06 | 44930000 | 45290000 | 360000  | 15  | W | W | W | W | W | W | I | 12  | 29    | 13   | 11    | 12   | 24    | 1405  |
| Gm06.VB.103 | Gm06 | 45290000 | 45410000 | 120000  | 7   | W | B | W | W | W | B | I | 34  | 1095  | 35   | 35    | 29   | 1055  | 918   |
| Gm06.VB.104 | Gm06 | 45410000 | 45550000 | 140000  | 6   | W | W | W | W | W | W | I | 5   | 26    | 5    | 4     | 5    | 26    | 931   |
| Gm06.VB.105 | Gm06 | 45550000 | 45630000 | 80000   | 4   | W | B | W | W | W | H | I | 6   | 717   | 6    | 6     | 6    | 693   | 436   |
| Gm06.VB.106 | Gm06 | 45630000 | 45790000 | 160000  | 4   | W | W | W | W | W | W | I | 48  | 64    | 42   | 31    | 26   | 34    | 825   |
| Gm06.VB.107 | Gm06 | 45790000 | 46260000 | 470000  | 34  | W | B | W | W | W | B | I | 48  | 2818  | 42   | 42    | 36   | 2695  | 2125  |
| Gm06.VB.108 | Gm06 | 46260000 | 48330000 | 2070000 | 200 | W | B | W | B | W | B | I | 179 | 11430 | 187  | 11214 | 163  | 10560 | 7096  |
| Gm06.VB.109 | Gm06 | 48330000 | 48350000 | 20000   | 1   | W | B | B | B | B | B | I | 0   | 93    | 86   | 94    | 83   | 93    | 58    |
| Gm06.VB.110 | Gm06 | 48350000 | 49020000 | 670000  | 62  | W | B | W | B | W | B | I | 38  | 2622  | 39   | 2606  | 31   | 2472  | 2206  |
| Gm06.VB.111 | Gm06 | 49020000 | 49140000 | 120000  | 12  | W | B | W | B | W | W | I | 0   | 369   | 0    | 382   | 0    | 12    | 393   |
| Gm06.VB.112 | Gm06 | 49140000 | 49240000 | 100000  | 11  | W | B | W | B | W | H | I | 7   | 245   | 6    | 238   | 2    | 177   | 147   |
| Gm06.VB.113 | Gm06 | 49240000 | 49690000 | 450000  | 35  | W | W | W | W | W | H | I | 39  | 49    | 38   | 48    | 41   | 920   | 1460  |
| Gm06.VB.114 | Gm06 | 49690000 | 49730000 | 40000   | 3   | W | B | W | B | W | H | I | 0   | 122   | 0    | 121   | 0    | 115   | 71    |
| Gm06.VB.115 | Gm06 | 49730000 | 49850000 | 120000  | 13  | W | W | W | W | W | H | I | 1   | 9     | 2    | 9     | 2    | 277   | 393   |
| Gm06.VB.116 | Gm06 | 49850000 | 49860000 | 10000   | 2   | W | W | W | W | W | W | I | 0   | 0     | 0    | 0     | 0    | 1     | 64    |
| Gm06.VB.117 | Gm06 | 49860000 | 50020000 | 160000  | 17  | W | B | W | B | W | W | I | 0   | 942   | 0    | 931   | 0    | 8     | 576   |
| Gm06.VB.118 | Gm06 | 50020000 | 50050000 | 30000   | 3   | W | B | W | B | W | H | I | 0   | 159   | 0    | 160   | 0    | 73    | 92    |
| Gm06.VB.119 | Gm06 | 50050000 | 50530000 | 480000  | 53  | W | B | W | B | B | H | I | 43  | 1856  | 33   | 1825  | 1699 | 1099  | 1159  |
| Gm06.VB.120 | Gm06 | 50530000 | 50720000 | 190000  | 9   | W | W | W | W | W | W | I | 9   | 15    | 6    | 16    | 13   | 9     | 356   |
| Gm06.VB.121 | Gm06 | 50720000 | 50722821 | 2821    | 0   | W | W | W | W | W | W | W | 0   | 0     | 0    | 0     | 0    | 0     | 0     |
| Gm07.VB.1   | Gm07 | 0        | 210000   | 210000  | 23  | W | B | S | B | S | H | I | 8   | 505   | 451  | 506   | 410  | 408   | 282   |
| Gm07.VB.2   | Gm07 | 210000   | 330000   | 120000  | 16  | W | W | S | W | S | H | I | 3   | 7     | 206  | 9     | 194  | 182   | 143   |
| Gm07.VB.3   | Gm07 | 330000   | 430000   | 100000  | 15  | W | W | W | W | W | H | I | 0   | 1     | 8    | 2     | 6    | 371   | 261   |
| Gm07.VB.4   | Gm07 | 430000   | 450000   | 20000   | 3   | W | W | S | W | S | H | I | 0   | 0     | 25   | 0     | 22   | 47    | 34    |
| Gm07.VB.5   | Gm07 | 450000   | 590000   | 140000  | 17  | W | W | S | W | S | W | I | 16  | 20    | 265  | 20    | 250  | 14    | 133   |
| Gm07.VB.6   | Gm07 | 590000   | 1080000  | 490000  | 53  | W | W | W | W | W | W | I | 23  | 32    | 29   | 32    | 24   | 33    | 808   |
| Gm07.VB.7   | Gm07 | 1080000  | 1350000  | 270000  | 24  | W | B | W | B | W | B | I | 31  | 606   | 40   | 597   | 26   | 548   | 328   |
| Gm07.VB.8   | Gm07 | 1350000  | 1400000  | 50000   | 4   | W | B | B | B | B | B | I | 1   | 171   | 176  | 170   | 147  | 157   | 74    |
| Gm07.VB.9   | Gm07 | 1400000  | 1610000  | 210000  | 30  | W | W | W | W | W | W | I | 25  | 26    | 29   | 27    | 11   | 11    | 590   |
| Gm07.VB.10  | Gm07 | 1610000  | 1630000  | 20000   | 4   | W | B | B | B | B | B | I | 0   | 45    | 42   | 43    | 42   | 41    | 65    |
| Gm07.VB.11  | Gm07 | 1630000  | 1700000  | 70000   | 10  | W | B | B | B | D | W | I | 0   | 176   | 181  | 174   | 137  | 4     | 126   |
| Gm07.VB.12  | Gm07 | 1700000  | 1800000  | 100000  | 14  | W | W | W | W | W | W | I | 1   | 14    | 15   | 14    | 15   | 7     | 247   |
| Gm07.VB.13  | Gm07 | 1800000  | 1820000  | 20000   | 2   | W | W | W | W | W | W | I | 0   | 4     | 4    | 5     | 4    | 1     | 44    |
| Gm07.VB.14  | Gm07 | 1820000  | 1860000  | 40000   | 5   | W | B | B | B | B | W | I | 0   | 62    | 62   | 62    | 62   | 5     | 57    |
| Gm07.VB.15  | Gm07 | 1860000  | 1870000  | 10000   | 1   | W | W | W | W | W | W | I | 0   | 1     | 1    | 1     | 1    | 3     | 9     |
| Gm07.VB.16  | Gm07 | 1870000  | 2410000  | 540000  | 55  | W | W | W | W | W | H | I | 31  | 73    | 76   | 73    | 75   | 2230  | 1331  |
| Gm07.VB.17  | Gm07 | 2410000  | 2430000  | 20000   | 4   | W | W | S | W | S | H | I | 0   | 1     | 53   | 1     | 48   | 62    | 55    |
| Gm07.VB.18  | Gm07 | 2430000  | 2440000  | 10000   | 1   | W | B | S | B | S | H | I | 0   | 42    | 29   | 42    | 26   | 27    | 11    |
| Gm07.VB.19  | Gm07 | 2440000  | 2590000  | 150000  | 22  | W | B | W | B | W | H | I | 27  | 694   | 29   | 681   | 29   | 657   | 328   |
| Gm07.VB.20  | Gm07 | 2590000  | 2600000  | 10000   | 1   | W | B | B | B | B | H | I | 0   | 62    | 61   | 63    | 61   | 13    | 14    |
| Gm07.VB.21  | Gm07 | 2600000  | 3230000  | 630000  | 55  | W | B | B | B | B | W | I | 20  | 2993  | 3006 | 2939  | 2802 | 39    | 1659  |
| Gm07.VB.22  | Gm07 | 3230000  | 3310000  | 80000   | 6   | W | B | W | B | W | W | I | 2   | 399   | 2    | 391   | 2    | 7     | 189   |
| Gm07.VB.23  | Gm07 | 3310000  | 3390000  | 80000   | 8   | W | B | W | B | W | H | I | 0   | 232   | 0    | 231   | 0    | 211   | 136   |
| Gm07.VB.24  | Gm07 | 3390000  | 3490000  | 100000  | 10  | W | B | W | B | W | W | I | 24  | 75    | 24   | 73    | 23   | 30    | 207   |
| Gm07.VB.25  | Gm07 | 3490000  | 3810000  | 320000  | 36  | W | W | W | W | W | W | I | 14  | 21    | 13   | 15    | 7    | 17    | 668   |
| Gm07.VB.26  | Gm07 | 3810000  | 3980000  | 170000  | 20  | W | B | W | W | W | W | I | 3   | 616   | 5    | 4     | 3    | 4     | 298   |
| Gm07.VB.27  | Gm07 | 3980000  | 4130000  | 150000  | 12  | W | W | W | W | W | W | I | 0   | 6     | 0    | 0     | 0    | 7     | 291   |
| Gm07.VB.28  | Gm07 | 4130000  | 4180000  | 50000   | 6   | W | B | W | W | W | B | I | 2   | 170   | 2    | 2     | 1    | 157   | 82    |
| Gm07.VB.29  | Gm07 | 4180000  | 4340000  | 160000  | 10  | W | W | W | W | W | W | I | 32  | 36    | 32   | 32    | 21   | 33    | 327   |
| Gm07.VB.30  | Gm07 | 4340000  | 4380000  | 40000   | 4   | W | W | W | W | W | H | I | 0   | 3     | 0    | 0     | 0    | 98    | 83    |
| Gm07.VB.31  | Gm07 | 4380000  | 4470000  | 90000   | 5   | W | B | W | W | W | B | I | 1   | 296   | 1    | 1     | 1    | 314   | 165   |
| Gm07.VB.32  | Gm07 | 4470000  | 4580000  | 110000  | 6   | W | W | W | W | W | H | I | 20  | 21    | 20   | 15    | 12   | 252   | 232   |
| Gm07.VB.33  | Gm07 | 4580000  | 5080000  | 500000  | 44  | W | W | W | W | W | W | I | 61  | 78    | 66   | 59    | 45   | 60    | 1317  |
| Gm07.VB.34  | Gm07 | 5080000  | 5360000  | 280000  | 26  | W | B | W | W | W | B | I | 42  | 1190  | 37   | 33    | 27   | 1054  | 950   |
| Gm07.VB.35  | Gm07 | 5360000  | 5470000  | 110000  | 7   | W | W | W | W | W | W | I | 2   | 7     | 2    | 1     | 2    | 7     | 459   |
| Gm07.VB.36  | Gm07 | 5470000  | 5480000  | 10000   | 1   | W | B | W | W | W | W | I | 0   | 5     | 0    | 0     | 0    | 4     | 11    |

|             |      |          |          |         |     |   |   |   |   |   |   |   |     |      |      |      |      |      |      |
|-------------|------|----------|----------|---------|-----|---|---|---|---|---|---|---|-----|------|------|------|------|------|------|
| Gm07.VB.37  | Gm07 | 5480000  | 6050000  | 570000  | 37  | W | B | W | W | W | H | I | 40  | 2492 | 34   | 36   | 20   | 2187 | 1194 |
| Gm07.VB.38  | Gm07 | 6050000  | 6510000  | 460000  | 42  | W | W | W | W | W | W | I | 43  | 65   | 44   | 40   | 27   | 43   | 1357 |
| Gm07.VB.39  | Gm07 | 6510000  | 7260000  | 750000  | 63  | W | B | W | W | W | B | I | 48  | 3726 | 57   | 51   | 45   | 3416 | 2560 |
| Gm07.VB.40  | Gm07 | 7260000  | 7430000  | 170000  | 10  | W | W | W | W | W | H | I | 1   | 13   | 3    | 3    | 1    | 476  | 385  |
| Gm07.VB.41  | Gm07 | 7430000  | 7540000  | 110000  | 13  | W | W | W | W | W | W | I | 22  | 34   | 24   | 20   | 12   | 30   | 94   |
| Gm07.VB.42  | Gm07 | 7540000  | 7680000  | 140000  | 10  | W | B | W | W | W | W | I | 41  | 744  | 41   | 41   | 15   | 48   | 394  |
| Gm07.VB.43  | Gm07 | 7680000  | 9050000  | 1370000 | 113 | W | B | W | W | W | H | I | 112 | 7801 | 103  | 101  | 76   | 7387 | 5048 |
| Gm07.VB.44  | Gm07 | 9050000  | 9250000  | 200000  | 12  | W | W | W | W | W | H | I | 7   | 28   | 8    | 12   | 1    | 656  | 866  |
| Gm07.VB.45  | Gm07 | 9250000  | 9310000  | 60000   | 0   | W | B | W | W | W | H | I | 5   | 569  | 8    | 15   | 4    | 634  | 178  |
| Gm07.VB.46  | Gm07 | 9310000  | 9420000  | 110000  | 5   | W | W | W | W | W | H | I | 0   | 12   | 0    | 0    | 0    | 920  | 457  |
| Gm07.VB.47  | Gm07 | 9420000  | 9560000  | 140000  | 12  | W | B | W | W | W | H | I | 18  | 774  | 18   | 9    | 18   | 915  | 638  |
| Gm07.VB.48  | Gm07 | 9560000  | 9730000  | 170000  | 12  | W | W | W | W | W | H | I | 4   | 12   | 4    | 5    | 4    | 1371 | 459  |
| Gm07.VB.49  | Gm07 | 9730000  | 9750000  | 20000   | 1   | W | B | W | W | W | H | I | 0   | 68   | 0    | 0    | 0    | 96   | 60   |
| Gm07.VB.50  | Gm07 | 9750000  | 9790000  | 40000   | 2   | W | B | W | W | W | W | I | 4   | 391  | 4    | 4    | 4    | 8    | 334  |
| Gm07.VB.51  | Gm07 | 9790000  | 9980000  | 190000  | 16  | W | W | W | W | W | W | I | 11  | 22   | 10   | 9    | 8    | 17   | 268  |
| Gm07.VB.52  | Gm07 | 9980000  | 10150000 | 170000  | 7   | W | W | W | W | W | H | I | 8   | 15   | 10   | 9    | 5    | 846  | 571  |
| Gm07.VB.53  | Gm07 | 10150000 | 10180000 | 30000   | 2   | W | W | W | W | W | W | I | 1   | 5    | 1    | 1    | 1    | 9    | 135  |
| Gm07.VB.54  | Gm07 | 10180000 | 10450000 | 270000  | 18  | W | B | W | W | W | W | I | 12  | 694  | 13   | 12   | 10   | 18   | 730  |
| Gm07.VB.55  | Gm07 | 10450000 | 10800000 | 350000  | 15  | W | W | W | W | W | W | I | 24  | 63   | 37   | 33   | 21   | 24   | 971  |
| Gm07.VB.56  | Gm07 | 10800000 | 10990000 | 190000  | 4   | W | B | W | W | W | W | I | 23  | 187  | 25   | 23   | 23   | 20   | 155  |
| Gm07.VB.57  | Gm07 | 10990000 | 14500000 | 3510000 | 99  | W | W | W | W | W | W | I | 155 | 294  | 172  | 157  | 149  | 272  | 6739 |
| Gm07.VB.58  | Gm07 | 14500000 | 14540000 | 40000   | 0   | W | B | W | W | W | B | I | 0   | 27   | 0    | 0    | 0    | 26   | 119  |
| Gm07.VB.59  | Gm07 | 14540000 | 14560000 | 20000   | 2   | W | B | W | W | W | W | I | 0   | 10   | 0    | 0    | 0    | 7    | 76   |
| Gm07.VB.60  | Gm07 | 14560000 | 14680000 | 120000  | 6   | W | W | W | W | W | W | W | 0   | 5    | 0    | 0    | 0    | 5    | 24   |
| Gm07.VB.61  | Gm07 | 14680000 | 14810000 | 130000  | 4   | W | B | W | W | W | W | I | 10  | 528  | 11   | 11   | 15   | 18   | 368  |
| Gm07.VB.62  | Gm07 | 14810000 | 15380000 | 570000  | 50  | W | B | S | S | S | H | I | 39  | 2726 | 3057 | 3010 | 2784 | 2092 | 1950 |
| Gm07.VB.63  | Gm07 | 15380000 | 15490000 | 110000  | 13  | W | B | W | W | W | H | I | 0   | 104  | 5    | 4    | 4    | 164  | 317  |
| Gm07.VB.64  | Gm07 | 15490000 | 15600000 | 110000  | 6   | W | B | S | S | S | H | I | 11  | 208  | 185  | 183  | 175  | 84   | 444  |
| Gm07.VB.65  | Gm07 | 15600000 | 15730000 | 130000  | 8   | W | W | S | S | S | H | I | 1   | 8    | 428  | 423  | 409  | 87   | 522  |
| Gm07.VB.66  | Gm07 | 15730000 | 15790000 | 60000   | 5   | W | B | S | S | S | H | I | 5   | 267  | 188  | 185  | 164  | 157  | 154  |
| Gm07.VB.67  | Gm07 | 15790000 | 15890000 | 100000  | 4   | W | B | S | S | S | W | I | 2   | 268  | 431  | 419  | 359  | 11   | 326  |
| Gm07.VB.68  | Gm07 | 15890000 | 16010000 | 120000  | 10  | W | B | W | W | W | W | I | 6   | 589  | 13   | 12   | 7    | 6    | 558  |
| Gm07.VB.69  | Gm07 | 16010000 | 16020000 | 10000   | 1   | W | B | S | S | S | H | I | 0   | 33   | 36   | 36   | 34   | 6    | 19   |
| Gm07.VB.70  | Gm07 | 16020000 | 16160000 | 140000  | 7   | W | W | S | S | S | H | I | 13  | 18   | 1267 | 1228 | 1170 | 191  | 633  |
| Gm07.VB.71  | Gm07 | 16160000 | 16210000 | 50000   | 4   | W | B | S | S | S | H | I | 19  | 462  | 98   | 98   | 92   | 53   | 372  |
| Gm07.VB.72  | Gm07 | 16210000 | 16320000 | 110000  | 2   | W | W | W | W | W | W | I | 42  | 56   | 49   | 47   | 34   | 37   | 71   |
| Gm07.VB.73  | Gm07 | 16320000 | 16440000 | 120000  | 8   | W | B | W | W | W | W | I | 1   | 913  | 3    | 3    | 2    | 3    | 736  |
| Gm07.VB.74  | Gm07 | 16440000 | 16450000 | 10000   | 1   | W | B | S | S | S | W | I | 10  | 83   | 5    | 5    | 5    | 1    | 53   |
| Gm07.VB.75  | Gm07 | 16450000 | 16510000 | 60000   | 9   | W | W | S | S | S | H | I | 69  | 70   | 262  | 261  | 238  | 53   | 166  |
| Gm07.VB.76  | Gm07 | 16510000 | 16780000 | 270000  | 17  | W | W | S | S | S | W | I | 102 | 112  | 974  | 903  | 986  | 100  | 705  |
| Gm07.VB.77  | Gm07 | 16780000 | 17010000 | 230000  | 13  | W | W | S | S | S | H | I | 180 | 190  | 1037 | 978  | 934  | 185  | 686  |
| Gm07.VB.78  | Gm07 | 17010000 | 17120000 | 110000  | 7   | W | W | S | S | D | W | I | 16  | 22   | 1146 | 1082 | 1002 | 16   | 397  |
| Gm07.VB.79  | Gm07 | 17120000 | 17210000 | 90000   | 6   | W | B | B | B | B | B | I | 9   | 254  | 280  | 279  | 266  | 240  | 149  |
| Gm07.VB.80  | Gm07 | 17210000 | 17340000 | 130000  | 1   | W | W | W | W | W | W | W | 20  | 30   | 37   | 36   | 32   | 29   | 36   |
| Gm07.VB.81  | Gm07 | 17340000 | 17630000 | 290000  | 10  | W | W | S | S | S | W | I | 40  | 53   | 1955 | 1893 | 1875 | 45   | 608  |
| Gm07.VB.82  | Gm07 | 17630000 | 17760000 | 130000  | 9   | W | B | S | S | S | B | I | 19  | 371  | 232  | 230  | 227  | 337  | 382  |
| Gm07.VB.83  | Gm07 | 17760000 | 17870000 | 110000  | 9   | W | B | B | B | B | W | I | 1   | 290  | 301  | 301  | 302  | 6    | 305  |
| Gm07.VB.84  | Gm07 | 17870000 | 17970000 | 100000  | 7   | W | B | B | B | B | H | I | 4   | 190  | 196  | 183  | 177  | 151  | 139  |
| Gm07.VB.85  | Gm07 | 17970000 | 17990000 | 20000   | 2   | W | B | B | B | B | W | I | 9   | 21   | 22   | 21   | 20   | 9    | 19   |
| Gm07.VB.86  | Gm07 | 17990000 | 18000000 | 10000   | 0   | W | W | W | G | W | W | W | 1   | 4    | 4    | 5    | 2    | 0    | 0    |
| Gm07.VB.87  | Gm07 | 18000000 | 18170000 | 170000  | 4   | W | W | W | W | W | W | I | 6   | 19   | 17   | 17   | 16   | 7    | 168  |
| Gm07.VB.88  | Gm07 | 18170000 | 18330000 | 160000  | 7   | W | B | B | B | B | W | I | 18  | 730  | 748  | 729  | 722  | 15   | 534  |
| Gm07.VB.89  | Gm07 | 18330000 | 18640000 | 310000  | 14  | W | B | B | B | B | B | I | 25  | 428  | 425  | 409  | 429  | 418  | 1071 |
| Gm07.VB.90  | Gm07 | 18640000 | 18820000 | 180000  | 5   | W | W | W | W | W | W | I | 1   | 20   | 21   | 20   | 21   | 38   | 1015 |
| Gm07.VB.91  | Gm07 | 18820000 | 18830000 | 10000   | 0   | W | W | W | W | W | H | I | 0   | 2    | 2    | 2    | 2    | 8    | 24   |
| Gm07.VB.92  | Gm07 | 18830000 | 19600000 | 770000  | 37  | W | B | B | B | B | H | I | 51  | 1677 | 1716 | 1677 | 1572 | 1691 | 2491 |
| Gm07.VB.93  | Gm07 | 19600000 | 20120000 | 520000  | 8   | W | B | B | B | B | W | I | 14  | 2067 | 2092 | 2026 | 2044 | 91   | 1646 |
| Gm07.VB.94  | Gm07 | 20120000 | 20890000 | 770000  | 9   | W | B | B | B | B | H | I | 43  | 881  | 900  | 890  | 880  | 388  | 700  |
| Gm07.VB.95  | Gm07 | 20890000 | 23810000 | 2920000 | 23  | W | B | B | B | B | W | I | 359 | 2351 | 2330 | 2345 | 2384 | 1188 | 1808 |
| Gm07.VB.96  | Gm07 | 23810000 | 23910000 | 100000  | 0   | W | B | B | B | B | H | I | 5   | 109  | 104  | 104  | 99   | 49   | 87   |
| Gm07.VB.97  | Gm07 | 23910000 | 24580000 | 670000  | 1   | W | B | B | B | B | W | I | 27  | 533  | 533  | 496  | 555  | 228  | 350  |
| Gm07.VB.98  | Gm07 | 24580000 | 24620000 | 40000   | 0   | W | B | S | G | D | W | W | 3   | 37   | 42   | 40   | 28   | 17   | 18   |
| Gm07.VB.99  | Gm07 | 24620000 | 25390000 | 770000  | 7   | W | B | B | B | B | W | I | 27  | 534  | 555  | 534  | 539  | 225  | 407  |
| Gm07.VB.100 | Gm07 | 25390000 | 25450000 | 60000   | 0   | W | B | B | B | B | H | I | 0   | 71   | 73   | 70   | 76   | 28   | 51   |
| Gm07.VB.101 | Gm07 | 25450000 | 26000000 | 550000  | 6   | W | B | B | B | B | W | I | 33  | 414  | 420  | 432  | 405  | 162  | 301  |
| Gm07.VB.102 | Gm07 | 26000000 | 26140000 | 140000  | 1   | W | B | B | B | B | H | I | 1   | 143  | 140  | 143  | 150  | 60   | 109  |
| Gm07.VB.103 | Gm07 | 26140000 | 26630000 | 490000  | 1   | W | B | S | G | D | W | I | 63  | 467  | 456  | 425  | 464  | 194  | 259  |
| Gm07.VB.104 | Gm07 | 26630000 | 26650000 | 20000   | 0   | W | W | W | G | W | W | W | 5   | 8    | 10   | 11   | 13   | 5    | 9    |
| Gm07.VB.105 | Gm07 | 26650000 | 26790000 | 140000  | 0   | W | W | W | W | W | W | W | 2   | 13   | 12   | 11   | 19   | 20   | 2    |
| Gm07.VB.106 | Gm07 | 26790000 | 26830000 | 40000   | 0   | W | W | W | W | W | W | W | 3   | 17   | 15   | 11   | 11   | 14   | 1    |
| Gm07.VB.107 | Gm07 | 26830000 | 28290000 | 1460000 | 16  | W | B | B | B | B | W | I | 71  | 1051 | 1053 | 1011 | 1061 | 467  | 781  |
| Gm07.VB.108 | Gm07 | 28290000 | 28350000 | 60000   | 0   | W | B | S | G | S | H | W | 0   | 61   | 54   | 46   | 54   | 30   | 23   |
| Gm07.VB.109 | Gm07 | 28350000 | 30270000 | 1920000 | 20  | W | B | B | B | B | W | I | 33  | 1347 | 1320 | 1332 | 1337 | 601  | 984  |
| Gm07.VB.110 | Gm07 | 30270000 | 34220000 | 3950000 | 44  | W | W | W | W | W | W | I | 156 | 383  | 397  | 360  | 411  | 623  | 3585 |
| Gm07.VB.111 | Gm07 | 34220000 | 34740000 | 520000  | 13  | W | W | W | W | W | H | I | 58  | 89   | 90   | 76   | 81   | 299  | 1133 |
| Gm07.VB.112 | Gm07 | 34740000 | 35040000 | 300000  | 4   | W | W | W | W | W | W | I | 7   | 34   | 40   | 35   | 37   | 105  | 388  |
| Gm07.VB.113 | Gm07 | 35040000 | 35230000 | 190000  | 19  | W | B | B | B | B | W | I | 2   | 212  | 214  | 212  | 201  | 4    | 328  |
| Gm07.VB.114 | Gm07 | 35230000 | 35340000 | 110000  | 11  | W | W | W | W | W | W | I |     |      |      |      |      |      |      |



|             |      |          |          |         |     |   |   |   |   |   |   |   |      |       |       |       |       |      |      |
|-------------|------|----------|----------|---------|-----|---|---|---|---|---|---|---|------|-------|-------|-------|-------|------|------|
| Gm07.VB.115 | Gm07 | 35340000 | 35490000 | 150000  | 15  | W | W | W | W | W | H | I | 7    | 15    | 14    | 12    | 5     | 70   | 426  |
| Gm07.VB.116 | Gm07 | 35490000 | 35640000 | 150000  | 14  | W | B | B | B | B | H | I | 7    | 765   | 767   | 763   | 690   | 364  | 399  |
| Gm07.VB.117 | Gm07 | 35640000 | 35930000 | 290000  | 23  | W | W | W | W | W | W | I | 17   | 24    | 23    | 24    | 25    | 87   | 705  |
| Gm07.VB.118 | Gm07 | 35930000 | 35980000 | 50000   | 5   | W | B | B | B | B | B | I | 8    | 201   | 203   | 204   | 197   | 185  | 162  |
| Gm07.VB.119 | Gm07 | 35980000 | 36080000 | 100000  | 10  | W | W | W | W | W | W | I | 17   | 24    | 21    | 21    | 17    | 16   | 300  |
| Gm07.VB.120 | Gm07 | 36080000 | 36150000 | 70000   | 4   | W | B | W | W | W | W | I | 12   | 386   | 16    | 16    | 10    | 11   | 225  |
| Gm07.VB.121 | Gm07 | 36150000 | 36190000 | 40000   | 2   | W | W | W | W | W | W | I | 0    | 3     | 3     | 4     | 4     | 1    | 82   |
| Gm07.VB.122 | Gm07 | 36190000 | 36230000 | 40000   | 4   | W | W | S | S | S | W | I | 8    | 12    | 101   | 99    | 99    | 8    | 27   |
| Gm07.VB.123 | Gm07 | 36230000 | 36330000 | 100000  | 5   | W | W | S | S | D | H | I | 5    | 8     | 275   | 287   | 251   | 205  | 109  |
| Gm07.VB.124 | Gm07 | 36330000 | 39020000 | 2690000 | 196 | W | B | S | B | S | H | I | 1982 | 10190 | 11355 | 10093 | 10436 | 9899 | 9156 |
| Gm07.VB.125 | Gm07 | 39020000 | 39100000 | 80000   | 9   | W | B | S | B | S | W | I | 0    | 100   | 227   | 98    | 209   | 2    | 164  |
| Gm07.VB.126 | Gm07 | 39100000 | 39240000 | 140000  | 8   | W | W | S | W | S | W | I | 2    | 15    | 526   | 14    | 489   | 5    | 217  |
| Gm07.VB.127 | Gm07 | 39240000 | 40940000 | 1700000 | 93  | W | W | W | W | W | W | I | 78   | 180   | 134   | 175   | 116   | 102  | 5415 |
| Gm07.VB.128 | Gm07 | 40940000 | 40970000 | 30000   | 1   | W | B | W | B | W | W | I | 10   | 228   | 7     | 217   | 4     | 5    | 114  |
| Gm07.VB.129 | Gm07 | 40970000 | 41850000 | 880000  | 49  | W | W | W | W | W | W | I | 22   | 102   | 24    | 89    | 21    | 42   | 2884 |
| Gm07.VB.130 | Gm07 | 41850000 | 41940000 | 90000   | 12  | W | B | W | B | W | B | I | 6    | 222   | 6     | 221   | 1     | 206  | 184  |
| Gm07.VB.131 | Gm07 | 41940000 | 42010000 | 70000   | 4   | W | W | W | W | W | W | I | 15   | 22    | 19    | 12    | 17    | 23   | 103  |
| Gm07.VB.132 | Gm07 | 42010000 | 42060000 | 50000   | 6   | W | W | W | W | W | W | I | 0    | 10    | 0     | 10    | 10    | 2    | 122  |
| Gm07.VB.133 | Gm07 | 42060000 | 42120000 | 60000   | 8   | W | B | W | B | D | D | I | 7    | 94    | 8     | 96    | 71    | 82   | 112  |
| Gm07.VB.134 | Gm07 | 42120000 | 42340000 | 220000  | 29  | W | W | W | W | W | W | I | 14   | 23    | 14    | 23    | 22    | 21   | 406  |
| Gm07.VB.135 | Gm07 | 42340000 | 42360000 | 20000   | 3   | W | B | W | B | D | W | I | 0    | 48    | 0     | 48    | 37    | 0    | 27   |
| Gm07.VB.136 | Gm07 | 42360000 | 42400000 | 40000   | 3   | W | B | W | B | B | H | I | 8    | 104   | 8     | 103   | 93    | 136  | 84   |
| Gm07.VB.137 | Gm07 | 42400000 | 42610000 | 210000  | 24  | W | W | W | W | W | H | I | 25   | 30    | 25    | 29    | 26    | 488  | 425  |
| Gm07.VB.138 | Gm07 | 42610000 | 42660000 | 50000   | 7   | W | B | W | B | B | H | I | 0    | 118   | 0     | 119   | 118   | 62   | 75   |
| Gm07.VB.139 | Gm07 | 42660000 | 42760000 | 100000  | 13  | W | W | W | W | W | W | I | 1    | 6     | 0     | 6     | 6     | 9    | 172  |
| Gm07.VB.140 | Gm07 | 42760000 | 42770000 | 10000   | 1   | W | B | W | W | W | W | I | 0    | 5     | 0     | 4     | 3     | 3    | 19   |
| Gm07.VB.141 | Gm07 | 42770000 | 42940000 | 170000  | 16  | W | B | W | B | B | B | I | 8    | 433   | 9     | 412   | 360   | 346  | 190  |
| Gm07.VB.142 | Gm07 | 42940000 | 43000000 | 60000   | 8   | W | W | W | W | W | H | I | 5    | 8     | 5     | 7     | 7     | 138  | 108  |
| Gm07.VB.143 | Gm07 | 43000000 | 44680000 | 1680000 | 202 | W | W | W | W | W | W | I | 55   | 66    | 54    | 53    | 35    | 55   | 3071 |
| Gm07.VB.144 | Gm07 | 44680000 | 44683157 | 3157    | 0   | W | W | W | W | W | H | I | 1    | 1     | 1     | 1     | 1     | 2    | 11   |
| Gm08.VB.1   | Gm08 | 0        | 350000   | 350000  | 39  | W | W | W | W | W | W | I | 10   | 10    | 19    | 9     | 10    | 20   | 736  |
| Gm08.VB.2   | Gm08 | 350000   | 490000   | 140000  | 16  | W | W | S | W | W | W | I | 4    | 6     | 185   | 6     | 10    | 10   | 345  |
| Gm08.VB.3   | Gm08 | 490000   | 530000   | 40000   | 5   | W | W | W | W | W | W | I | 1    | 1     | 9     | 1     | 2     | 1    | 74   |
| Gm08.VB.4   | Gm08 | 530000   | 620000   | 90000   | 10  | W | W | W | W | W | H | I | 11   | 11    | 13    | 11    | 11    | 89   | 134  |
| Gm08.VB.5   | Gm08 | 620000   | 640000   | 20000   | 0   | W | W | S | W | W | W | I | 0    | 0     | 31    | 0     | 0     | 2    | 20   |
| Gm08.VB.6   | Gm08 | 640000   | 950000   | 310000  | 36  | W | W | W | W | W | H | I | 22   | 22    | 56    | 23    | 20    | 540  | 653  |
| Gm08.VB.7   | Gm08 | 950000   | 1120000  | 170000  | 23  | W | W | W | W | W | W | I | 16   | 22    | 24    | 15    | 20    | 24   | 335  |
| Gm08.VB.8   | Gm08 | 1120000  | 1260000  | 140000  | 16  | W | B | B | B | B | B | I | 3    | 212   | 221   | 213   | 192   | 197  | 356  |
| Gm08.VB.9   | Gm08 | 1260000  | 1460000  | 200000  | 19  | W | B | S | B | B | W | I | 15   | 163   | 257   | 158   | 160   | 27   | 466  |
| Gm08.VB.10  | Gm08 | 1460000  | 1530000  | 70000   | 6   | W | B | B | B | B | B | I | 0    | 200   | 200   | 198   | 183   | 194  | 132  |
| Gm08.VB.11  | Gm08 | 1530000  | 1700000  | 170000  | 17  | W | B | W | B | W | B | I | 8    | 626   | 16    | 613   | 11    | 556  | 445  |
| Gm08.VB.12  | Gm08 | 1700000  | 1880000  | 180000  | 25  | W | B | W | B | W | W | I | 2    | 129   | 5     | 127   | 1     | 15   | 344  |
| Gm08.VB.13  | Gm08 | 1880000  | 2070000  | 190000  | 23  | W | B | W | B | W | H | I | 9    | 641   | 10    | 617   | 7     | 352  | 338  |
| Gm08.VB.14  | Gm08 | 2070000  | 2270000  | 200000  | 20  | W | W | W | W | W | W | I | 3    | 16    | 7     | 16    | 3     | 25   | 195  |
| Gm08.VB.15  | Gm08 | 2270000  | 3060000  | 790000  | 97  | W | B | W | B | W | H | I | 46   | 3248  | 48    | 3208  | 32    | 2606 | 2070 |
| Gm08.VB.16  | Gm08 | 3060000  | 3190000  | 130000  | 15  | W | B | W | B | W | W | I | 5    | 205   | 6     | 198   | 9     | 12   | 261  |
| Gm08.VB.17  | Gm08 | 3190000  | 3340000  | 150000  | 16  | W | W | W | W | W | W | I | 2    | 14    | 2     | 13    | 1     | 8    | 268  |
| Gm08.VB.18  | Gm08 | 3340000  | 3380000  | 40000   | 5   | W | W | W | W | W | H | I | 8    | 11    | 11    | 11    | 8     | 131  | 78   |
| Gm08.VB.19  | Gm08 | 3380000  | 3510000  | 130000  | 17  | W | W | W | W | W | W | I | 7    | 6     | 7     | 5     | 2     | 3    | 250  |
| Gm08.VB.20  | Gm08 | 3510000  | 3570000  | 60000   | 6   | W | W | W | W | W | H | I | 0    | 3     | 0     | 0     | 0     | 49   | 114  |
| Gm08.VB.21  | Gm08 | 3570000  | 4580000  | 1010000 | 124 | W | W | W | W | W | W | I | 32   | 64    | 68    | 58    | 46    | 44   | 2302 |
| Gm08.VB.22  | Gm08 | 4580000  | 4610000  | 30000   | 2   | W | W | S | W | S | S | I | 0    | 0     | 117   | 0     | 103   | 104  | 58   |
| Gm08.VB.23  | Gm08 | 4610000  | 4740000  | 130000  | 13  | W | W | S | W | S | W | I | 9    | 9     | 374   | 9     | 317   | 8    | 322  |
| Gm08.VB.24  | Gm08 | 4740000  | 5130000  | 390000  | 44  | W | B | B | B | B | W | I | 14   | 875   | 895   | 849   | 820   | 14   | 765  |
| Gm08.VB.25  | Gm08 | 5130000  | 5650000  | 520000  | 66  | W | W | W | W | W | W | I | 21   | 43    | 39    | 42    | 46    | 24   | 1101 |
| Gm08.VB.26  | Gm08 | 5650000  | 5740000  | 90000   | 12  | W | B | B | B | B | W | I | 7    | 229   | 229   | 227   | 208   | 7    | 115  |
| Gm08.VB.27  | Gm08 | 5740000  | 5980000  | 240000  | 27  | W | W | W | W | W | W | I | 10   | 21    | 19    | 17    | 17    | 13   | 425  |
| Gm08.VB.28  | Gm08 | 5980000  | 6420000  | 440000  | 59  | W | B | B | B | B | W | I | 39   | 1992  | 2046  | 1945  | 1778  | 31   | 1011 |
| Gm08.VB.29  | Gm08 | 6420000  | 6540000  | 120000  | 8   | W | W | W | W | W | W | I | 22   | 28    | 30    | 25    | 33    | 27   | 160  |
| Gm08.VB.30  | Gm08 | 6540000  | 6630000  | 90000   | 10  | W | B | B | B | B | W | I | 7    | 257   | 253   | 255   | 233   | 5    | 200  |
| Gm08.VB.31  | Gm08 | 6630000  | 7360000  | 730000  | 81  | W | W | W | W | W | W | I | 51   | 98    | 79    | 70    | 54    | 44   | 1152 |
| Gm08.VB.32  | Gm08 | 7360000  | 7450000  | 90000   | 11  | W | W | W | W | W | H | I | 3    | 10    | 3     | 3     | 4     | 283  | 155  |
| Gm08.VB.33  | Gm08 | 7450000  | 7500000  | 50000   | 5   | W | B | W | W | W | H | I | 9    | 259   | 8     | 8     | 8     | 48   | 130  |
| Gm08.VB.34  | Gm08 | 7500000  | 7530000  | 30000   | 4   | W | B | W | W | W | W | I | 0    | 190   | 0     | 0     | 0     | 0    | 120  |
| Gm08.VB.35  | Gm08 | 7530000  | 7810000  | 280000  | 24  | W | W | W | W | W | W | I | 11   | 23    | 11    | 11    | 8     | 17   | 545  |
| Gm08.VB.36  | Gm08 | 7810000  | 8270000  | 460000  | 55  | W | B | W | W | W | W | I | 12   | 1079  | 14    | 12    | 11    | 23   | 1007 |
| Gm08.VB.37  | Gm08 | 8270000  | 8280000  | 10000   | 1   | W | W | W | W | W | W | I | 1    | 2     | 1     | 0     | 1     | 1    | 15   |
| Gm08.VB.38  | Gm08 | 8280000  | 8580000  | 300000  | 35  | W | W | W | W | W | H | I | 4    | 12    | 2     | 4     | 2     | 611  | 415  |
| Gm08.VB.39  | Gm08 | 8580000  | 8790000  | 210000  | 27  | W | W | W | W | W | W | I | 17   | 18    | 17    | 19    | 15    | 25   | 418  |
| Gm08.VB.40  | Gm08 | 8790000  | 8920000  | 130000  | 12  | W | W | W | W | W | H | I | 3    | 8     | 3     | 3     | 0     | 87   | 241  |
| Gm08.VB.41  | Gm08 | 8920000  | 9100000  | 180000  | 18  | W | W | W | W | W | W | I | 38   | 36    | 34    | 26    | 10    | 21   | 393  |
| Gm08.VB.42  | Gm08 | 9100000  | 9170000  | 70000   | 7   | W | B | W | W | W | W | I | 6    | 246   | 6     | 5     | 6     | 6    | 215  |
| Gm08.VB.43  | Gm08 | 9170000  | 9180000  | 10000   | 1   | W | W | W | W | W | W | I | 0    | 0     | 0     | 0     | 0     | 1    | 37   |
| Gm08.VB.44  | Gm08 | 9180000  | 9400000  | 220000  | 33  | W | W | W | W | W | H | I | 16   | 22    | 19    | 14    | 7     | 372  | 518  |
| Gm08.VB.45  | Gm08 | 9400000  | 10040000 | 640000  | 74  | W | B | W | W | W | H | I | 35   | 2068  | 35    | 35    | 32    | 1822 | 1252 |
| Gm08.VB.46  | Gm08 | 10040000 | 10270000 | 230000  | 34  | W | W | W | W | W | W | I | 3    | 21    | 3     | 3     | 0     | 15   | 449  |
| Gm08.VB.47  | Gm08 | 10270000 | 10340000 | 70000   | 4   | W | B | W | W | W | W | I | 22   | 213   | 22    | 12    | 16    | 20   | 155  |
| Gm08.VB.48  | Gm08 | 10340000 | 11070000 | 730000  | 94  | W | B | W | W | W | H | I | 12   | 1684  | 13    | 10    | 10    | 1164 | 1247 |

|             |      |          |          |          |     |   |   |   |     |   |   |   |     |       |     |     |     |      |      |
|-------------|------|----------|----------|----------|-----|---|---|---|-----|---|---|---|-----|-------|-----|-----|-----|------|------|
| Gm08.VB.49  | Gm08 | 11070000 | 11230000 | 160000   | 18  | W | B | W | W   | W | W | I | 3   | 637   | 3   | 3   | 1   | 11   | 277  |
| Gm08.VB.50  | Gm08 | 11230000 | 11240000 | 10000    | 1   | W | B | W | W   | W | H | I | 0   | 37    | 0   | 0   | 0   | 31   | 14   |
| Gm08.VB.51  | Gm08 | 11240000 | 11440000 | 200000   | 18  | W | B | W | W   | W | W | I | 2   | 588   | 2   | 2   | 0   | 15   | 420  |
| Gm08.VB.52  | Gm08 | 11440000 | 11600000 | 160000   | 14  | W | B | W | W   | W | H | I | 6   | 415   | 7   | 7   | 3   | 308  | 425  |
| Gm08.VB.53  | Gm08 | 11600000 | 11900000 | 300000   | 26  | W | W | W | W   | W | W | I | 15  | 20    | 14  | 13  | 15  | 17   | 397  |
| Gm08.VB.54  | Gm08 | 11900000 | 11980000 | 80000    | 5   | W | B | W | W   | W | H | I | 0   | 388   | 0   | 0   | 0   | 200  | 118  |
| Gm08.VB.55  | Gm08 | 11980000 | 11990000 | 10000    | 2   | W | B | W | W   | W | W | W | 0   | 12    | 0   | 0   | 0   | 4    | 1    |
| Gm08.VB.56  | Gm08 | 11990000 | 12330000 | 340000   | 32  | W | W | W | W   | W | W | I | 14  | 33    | 16  | 16  | 16  | 22   | 380  |
| Gm08.VB.57  | Gm08 | 12330000 | 12430000 | 100000   | 11  | W | B | W | W   | W | W | I | 8   | 106   | 8   | 7   | 7   | 29   | 159  |
| Gm08.VB.58  | Gm08 | 12430000 | 12560000 | 130000   | 15  | W | B | W | W   | W | B | I | 2   | 137   | 2   | 2   | 0   | 118  | 322  |
| Gm08.VB.59  | Gm08 | 12560000 | 13910000 | 1350000  | 108 | W | W | W | W   | W | W | I | 168 | 209   | 176 | 151 | 131 | 136  | 2196 |
| Gm08.VB.60  | Gm08 | 13910000 | 13940000 | 30000    | 1   | W | B | W | W   | W | W | I | 0   | 36    | 0   | 0   | 0   | 3    | 32   |
| Gm08.VB.61  | Gm08 | 13940000 | 14040000 | 100000   | 11  | W | B | W | W   | W | H | I | 2   | 371   | 2   | 3   | 2   | 111  | 215  |
| Gm08.VB.62  | Gm08 | 14040000 | 14210000 | 170000   | 13  | W | W | W | W   | W | W | I | 19  | 30    | 20  | 20  | 19  | 25   | 402  |
| Gm08.VB.63  | Gm08 | 14210000 | 14360000 | 150000   | 16  | W | B | W | W   | W | H | I | 26  | 468   | 29  | 28  | 18  | 160  | 414  |
| Gm08.VB.64  | Gm08 | 14360000 | 14400000 | 40000    | 6   | W | B | W | W   | W | W | I | 0   | 37    | 0   | 0   | 0   | 4    | 58   |
| Gm08.VB.65  | Gm08 | 14400000 | 14610000 | 210000   | 20  | W | W | W | W   | W | W | I | 34  | 50    | 31  | 33  | 30  | 45   | 588  |
| Gm08.VB.66  | Gm08 | 14610000 | 14860000 | 250000   | 26  | W | B | W | W   | W | B | I | 13  | 582   | 13  | 11  | 11  | 522  | 480  |
| Gm08.VB.67  | Gm08 | 14860000 | 15150000 | 290000   | 32  | W | W | W | W   | W | W | I | 10  | 22    | 12  | 8   | 11  | 17   | 478  |
| Gm08.VB.68  | Gm08 | 15150000 | 15300000 | 150000   | 15  | W | B | W | W   | W | H | I | 5   | 615   | 5   | 5   | 7   | 285  | 304  |
| Gm08.VB.69  | Gm08 | 15300000 | 15320000 | 20000    | 2   | W | B | W | W   | W | W | I | 0   | 21    | 0   | 0   | 0   | 3    | 50   |
| Gm08.VB.70  | Gm08 | 15320000 | 15570000 | 250000   | 27  | W | W | W | W   | W | W | I | 6   | 23    | 6   | 8   | 6   | 13   | 687  |
| Gm08.VB.71  | Gm08 | 15570000 | 15580000 | 10000    | 0   | W | B | W | W   | W | W | I | 0   | 33    | 0   | 0   | 0   | 4    | 22   |
| Gm08.VB.72  | Gm08 | 15580000 | 16260000 | 680000   | 62  | W | B | W | W   | W | H | I | 73  | 2533  | 78  | 74  | 60  | 400  | 1477 |
| Gm08.VB.73  | Gm08 | 16260000 | 16280000 | 20000    | 1   | W | B | W | W   | W | W | I | 3   | 44    | 4   | 3   | 0   | 9    | 23   |
| Gm08.VB.74  | Gm08 | 16280000 | 16460000 | 180000   | 17  | W | W | W | W   | W | W | I | 9   | 20    | 10  | 10  | 11  | 21   | 365  |
| Gm08.VB.75  | Gm08 | 16460000 | 16780000 | 320000   | 41  | W | W | W | W   | W | H | I | 19  | 18    | 23  | 20  | 9   | 393  | 542  |
| Gm08.VB.76  | Gm08 | 16780000 | 17220000 | 440000   | 53  | W | W | W | W   | W | W | I | 25  | 20    | 23  | 20  | 19  | 25   | 1266 |
| Gm08.VB.77  | Gm08 | 17220000 | 17360000 | 140000   | 14  | W | W | W | W   | W | H | I | 12  | 13    | 14  | 13  | 7   | 209  | 242  |
| Gm08.VB.78  | Gm08 | 17360000 | 17550000 | 190000   | 14  | W | W | W | W   | W | W | I | 4   | 2     | 4   | 5   | 1   | 7    | 614  |
| Gm08.VB.79  | Gm08 | 17550000 | 17630000 | 80000    | 7   | W | W | W | W   | W | H | I | 13  | 11    | 13  | 11  | 10  | 90   | 170  |
| Gm08.VB.80  | Gm08 | 17630000 | 18170000 | 540000   | 61  | W | W | W | W   | W | W | I | 22  | 21    | 23  | 19  | 20  | 30   | 1323 |
| Gm08.VB.81  | Gm08 | 18170000 | 18450000 | 280000   | 28  | W | W | W | W   | W | H | I | 19  | 21    | 21  | 21  | 15  | 908  | 1168 |
| Gm08.VB.82  | Gm08 | 18450000 | 18610000 | 160000   | 10  | W | W | W | W   | W | W | W | 0   | 0     | 0   | 0   | 0   | 5    | 56   |
| Gm08.VB.83  | Gm08 | 18610000 | 18950000 | 340000   | 24  | W | W | W | W   | W | H | I | 52  | 53    | 52  | 46  | 38  | 1226 | 1227 |
| Gm08.VB.84  | Gm08 | 18950000 | 19060000 | 110000   | 10  | W | W | W | W   | W | W | I | 0   | 0     | 1   | 0   | 0   | 4    | 299  |
| Gm08.VB.85  | Gm08 | 19060000 | 19100000 | 40000    | 1   | W | W | W | W   | W | H | I | 3   | 3     | 6   | 1   | 11  | 27   | 92   |
| Gm08.VB.86  | Gm08 | 19100000 | 19360000 | 260000   | 11  | W | B | W | W   | W | H | I | 34  | 1351  | 33  | 22  | 25  | 759  | 794  |
| Gm08.VB.87  | Gm08 | 19360000 | 20340000 | 980000   | 40  | W | B | W | W   | W | W | I | 48  | 2452  | 48  | 47  | 32  | 53   | 1932 |
| Gm08.VB.88  | Gm08 | 20340000 | 20480000 | 140000   | 12  | W | W | W | W   | W | W | I | 0   | 6     | 0   | 0   | 0   | 1    | 361  |
| Gm08.VB.89  | Gm08 | 20480000 | 20510000 | 30000    | 4   | W | W | W | W   | W | H | I | 0   | 0     | 0   | 0   | 0   | 69   | 52   |
| Gm08.VB.90  | Gm08 | 20510000 | 20830000 | 320000   | 22  | W | W | W | W   | W | W | I | 5   | 12    | 5   | 5   | 4   | 7    | 1267 |
| Gm08.VB.91  | Gm08 | 20830000 | 21160000 | 330000   | 13  | W | B | W | W   | W | W | I | 24  | 358   | 23  | 18  | 20  | 48   | 277  |
| Gm08.VB.92  | Gm08 | 21160000 | 22090000 | 930000   | 52  | W | B | W | W   | W | H | I | 44  | 3238  | 49  | 42  | 38  | 2761 | 3842 |
| Gm08.VB.93  | Gm08 | 22090000 | 22490000 | 400000   | 24  | W | W | W | W   | W | W | I | 10  | 34    | 11  | 10  | 10  | 28   | 1625 |
| Gm08.VB.94  | Gm08 | 22490000 | 22650000 | 160000   | 8   | W | B | W | W   | W | B | I | 53  | 1217  | 49  | 38  | 34  | 1187 | 1043 |
| Gm08.VB.95  | Gm08 | 22650000 | 22710000 | 60000    | 4   | W | W | W | W   | W | W | I | 2   | 13    | 2   | 3   | 2   | 11   | 155  |
| Gm08.VB.96  | Gm08 | 22710000 | 22890000 | 180000   | 9   | W | W | W | W   | W | W | I | 6   | 26    | 6   | 6   | 1   | 18   | 123  |
| Gm08.VB.97  | Gm08 | 22890000 | 22900000 | 10000    | 0   | W | B | W | W   | W | W | I | 0   | 5     | 0   | 1   | 0   | 4    | 34   |
| Gm08.VB.98  | Gm08 | 22900000 | 23300000 | 400000   | 20  | W | B | W | W   | W | B | I | 55  | 2433  | 56  | 52  | 44  | 2380 | 2234 |
| Gm08.VB.99  | Gm08 | 23300000 | 35340000 | 12040000 | 97  | W | B | W | W   | W | W | I | 607 | 23340 | 619 | 532 | 600 | 953  | 5530 |
| Gm08.VB.100 | Gm08 | 35340000 | 35460000 | 120000   | 2   | W | W | W | W   | W | W | I | 3   | 14    | 2   | 3   | 2   | 3    | 188  |
| Gm08.VB.101 | Gm08 | 35460000 | 36420000 | 960000   | 19  | W | B | W | W   | W | W | I | 38  | 3844  | 35  | 31  | 20  | 52   | 713  |
| Gm08.VB.102 | Gm08 | 36420000 | 39960000 | 3540000  | 127 | W | W | W | W   | W | W | I | 180 | 298   | 180 | 168 | 144 | 240  | 9253 |
| Gm08.VB.103 | Gm08 | 39960000 | 39980000 | 20000    | 2   | W | B | W | W   | W | B | I | 0   | 52    | 0   | 0   | 0   | 52   | 38   |
| Gm08.VB.104 | Gm08 | 39980000 | 40290000 | 310000   | 16  | W | W | W | W   | W | W | I | 22  | 24    | 20  | 22  | 15  | 19   | 1125 |
| Gm08.VB.105 | Gm08 | 40290000 | 40510000 | 220000   | 15  | W | W | W | W   | W | H | I | 5   | 6     | 5   | 6   | 5   | 179  | 582  |
| Gm08.VB.106 | Gm08 | 40510000 | 40670000 | 160000   | 8   | W | W | W | W   | W | W | I | 9   | 10    | 10  | 9   | 7   | 24   | 334  |
| Gm08.VB.107 | Gm08 | 40670000 | 40810000 | 140000   | 6   | W | W | W | W   | W | H | I | 2   | 3     | 2   | 4   | 2   | 131  | 520  |
| Gm08.VB.108 | Gm08 | 40810000 | 41110000 | 300000   | 11  | W | W | W | W   | W | W | I | 55  | 53    | 54  | 50  | 27  | 60   | 1044 |
| Gm08.VB.109 | Gm08 | 41110000 | 41530000 | 420000   | 30  | W | W | W | W   | W | H | I | 8   | 8     | 8   | 8   | 5   | 1240 | 1470 |
| Gm08.VB.110 | Gm08 | 41530000 | 41770000 | 240000   | 17  | W | W | W | W   | W | W | I | 14  | 16    | 13  | 17  | 10  | 18   | 1009 |
| Gm08.VB.111 | Gm08 | 41770000 | 41870000 | 100000   | 10  | W | W | W | W   | W | H | I | 15  | 14    | 13  | 10  | 12  | 472  | 292  |
| Gm08.VB.112 | Gm08 | 41870000 | 41980000 | 110000   | 8   | W | W | W | W   | W | W | I | 16  | 16    | 18  | 17  | 12  | 12   | 292  |
| Gm08.VB.113 | Gm08 | 41980000 | 42070000 | 90000    | 5   | W | W | W | W   | W | H | I | 19  | 19    | 24  | 19  | 22  | 407  | 208  |
| Gm08.VB.114 | Gm08 | 42070000 | 42510000 | 440000   | 29  | W | W | W | W   | W | W | I | 84  | 85    | 79  | 78  | 77  | 90   | 1403 |
| Gm08.VB.115 | Gm08 | 42510000 | 43580000 | 1070000  | 97  | W | W | W | W   | W | H | I | 102 | 99    | 108 | 98  | 82  | 4767 | 3140 |
| Gm08.VB.116 | Gm08 | 43580000 | 43770000 | 190000   | 15  | W | W | W | W   | W | W | I | 16  | 15    | 12  | 17  | 4   | 13   | 840  |
| Gm08.VB.117 | Gm08 | 43770000 | 44010000 | 240000   | 23  | W | W | W | W   | W | H | I | 4   | 5     | 5   | 5   | 6   | 579  | 536  |
| Gm08.VB.118 | Gm08 | 44010000 | 44210000 | 200000   | 26  | W | W | W | W   | W | W | I | 15  | 16    | 15  | 14  | 14  | 16   | 424  |
| Gm08.VB.119 | Gm08 | 44210000 | 44740000 | 530000   | 52  | W | W | W | W   | W | H | I | 11  | 11    | 11  | 11  | 9   | 1818 | 1226 |
| Gm08.VB.120 | Gm08 | 44740000 | 45210000 | 470000   | 51  | W | W | W | W   | W | W | I | 22  | 25    | 24  | 23  | 12  | 44   | 1262 |
| Gm08.VB.121 | Gm08 | 45210000 | 45490000 | 280000   | 32  | W | W | W | W   | W | H | I | 14  | 14    | 15  | 14  | 13  | 552  | 534  |
| Gm08.VB.122 | Gm08 | 45490000 | 45620000 | 130000   | 14  | W | W | W | W   | W | W | I | 5   | 5     | 5   | 5   | 5   | 9    | 127  |
| Gm08.VB.123 | Gm08 | 45620000 | 45980000 | 360000   | 38  | W | W | W | W   | W | H | I | 9   | 13    | 14  | 13  | 9   | 274  | 896  |
| Gm08.VB.124 | Gm08 | 45980000 | 46550000 | 570000   | 60  | W | W | W | W   | W | W | I | 62  | 60    | 63  | 56  | 48  | 83   | 1335 |
| Gm08.VB.125 | Gm08 | 46550000 | 46990000 | 440000   | 43  | W | W | W | W   | W | H | I | 38  | 39    | 38  | 37  | 35  | 270  | 896  |
| Gm08.VB.126 | Gm08 | 46990000 | 46995532 | 5532     | 0   | W | W | W | W</ |   |   |   |     |       |     |     |     |      |      |

|            |      |          |          |         |    |   |   |   |   |   |   |   |     |      |     |      |      |      |      |
|------------|------|----------|----------|---------|----|---|---|---|---|---|---|---|-----|------|-----|------|------|------|------|
| Gm09.VB.1  | Gm09 | 0        | 210000   | 210000  | 19 | W | W | W | W | W | W | W | 21  | 25   | 62  | 25   | 23   | 20   | 62   |
| Gm09.VB.2  | Gm09 | 210000   | 230000   | 20000   | 3  | W | W | S | W | W | W | I | 0   | 0    | 38  | 0    | 0    | 0    | 55   |
| Gm09.VB.3  | Gm09 | 230000   | 320000   | 90000   | 9  | W | W | W | W | W | W | I | 0   | 3    | 0   | 3    | 2    | 0    | 186  |
| Gm09.VB.4  | Gm09 | 320000   | 450000   | 130000  | 18 | W | B | W | B | D | H | I | 7   | 361  | 7   | 349  | 278  | 398  | 331  |
| Gm09.VB.5  | Gm09 | 450000   | 620000   | 170000  | 19 | W | B | W | B | B | W | I | 17  | 396  | 18  | 384  | 369  | 18   | 408  |
| Gm09.VB.6  | Gm09 | 620000   | 720000   | 100000  | 10 | W | W | W | W | W | H | I | 3   | 13   | 4   | 14   | 13   | 175  | 168  |
| Gm09.VB.7  | Gm09 | 720000   | 770000   | 50000   | 5  | W | B | W | B | B | H | I | 2   | 84   | 2   | 83   | 77   | 150  | 127  |
| Gm09.VB.8  | Gm09 | 770000   | 880000   | 110000  | 15 | W | W | W | W | W | H | I | 1   | 4    | 2   | 4    | 4    | 586  | 179  |
| Gm09.VB.9  | Gm09 | 880000   | 930000   | 50000   | 5  | W | B | W | B | B | H | I | 7   | 164  | 7   | 164  | 161  | 208  | 156  |
| Gm09.VB.10 | Gm09 | 930000   | 940000   | 10000   | 1  | W | B | W | B | W | H | W | 0   | 5    | 0   | 5    | 4    | 37   | 2    |
| Gm09.VB.11 | Gm09 | 940000   | 1040000  | 100000  | 15 | W | W | W | W | W | H | I | 3   | 16   | 6   | 20   | 31   | 228  | 139  |
| Gm09.VB.12 | Gm09 | 1040000  | 1210000  | 170000  | 19 | W | B | W | B | B | H | I | 13  | 555  | 14  | 540  | 522  | 339  | 455  |
| Gm09.VB.13 | Gm09 | 1210000  | 1540000  | 330000  | 40 | W | B | W | B | B | W | I | 4   | 1043 | 3   | 1033 | 975  | 19   | 443  |
| Gm09.VB.14 | Gm09 | 1540000  | 1890000  | 350000  | 30 | W | B | W | B | B | B | I | 18  | 1729 | 19  | 1680 | 1509 | 1573 | 733  |
| Gm09.VB.15 | Gm09 | 1890000  | 2630000  | 740000  | 76 | W | W | W | W | W | W | I | 19  | 32   | 22  | 29   | 21   | 22   | 1741 |
| Gm09.VB.16 | Gm09 | 2630000  | 2950000  | 320000  | 29 | W | B | W | B | B | B | I | 16  | 956  | 16  | 933  | 855  | 889  | 967  |
| Gm09.VB.17 | Gm09 | 2950000  | 3090000  | 140000  | 13 | W | W | W | W | W | W | I | 0   | 6    | 1   | 6    | 6    | 6    | 217  |
| Gm09.VB.18 | Gm09 | 3090000  | 3140000  | 50000   | 3  | W | B | W | B | B | W | I | 1   | 58   | 1   | 55   | 49   | 4    | 37   |
| Gm09.VB.19 | Gm09 | 3140000  | 3180000  | 40000   | 6  | W | B | W | B | B | H | W | 0   | 21   | 0   | 21   | 21   | 104  | 16   |
| Gm09.VB.20 | Gm09 | 3180000  | 3200000  | 20000   | 1  | W | B | W | B | B | W | I | 0   | 84   | 0   | 79   | 71   | 0    | 49   |
| Gm09.VB.21 | Gm09 | 3200000  | 3580000  | 380000  | 34 | W | W | W | W | W | W | I | 28  | 29   | 32  | 25   | 21   | 30   | 916  |
| Gm09.VB.22 | Gm09 | 3580000  | 3710000  | 130000  | 15 | W | W | W | W | W | H | I | 3   | 3    | 1   | 3    | 3    | 79   | 380  |
| Gm09.VB.23 | Gm09 | 3710000  | 3880000  | 170000  | 18 | W | B | W | B | B | H | I | 17  | 836  | 17  | 820  | 741  | 385  | 334  |
| Gm09.VB.24 | Gm09 | 3880000  | 3960000  | 80000   | 6  | W | B | W | B | B | W | I | 2   | 570  | 2   | 567  | 518  | 4    | 235  |
| Gm09.VB.25 | Gm09 | 3960000  | 4090000  | 130000  | 9  | W | W | W | W | W | W | I | 3   | 13   | 3   | 14   | 12   | 2    | 250  |
| Gm09.VB.26 | Gm09 | 4090000  | 4250000  | 160000  | 13 | W | B | W | B | B | W | I | 6   | 1454 | 8   | 1449 | 1379 | 8    | 689  |
| Gm09.VB.27 | Gm09 | 4250000  | 4670000  | 420000  | 32 | W | B | W | B | B | H | I | 58  | 2066 | 59  | 2047 | 1881 | 657  | 1420 |
| Gm09.VB.28 | Gm09 | 4670000  | 5000000  | 330000  | 21 | W | B | W | B | B | W | I | 22  | 2242 | 26  | 2220 | 2041 | 36   | 1224 |
| Gm09.VB.29 | Gm09 | 5000000  | 5330000  | 330000  | 22 | W | W | W | W | W | H | I | 11  | 27   | 12  | 27   | 27   | 1875 | 1352 |
| Gm09.VB.30 | Gm09 | 5330000  | 5350000  | 20000   | 3  | W | B | W | B | B | H | I | 0   | 31   | 0   | 31   | 31   | 42   | 71   |
| Gm09.VB.31 | Gm09 | 5350000  | 5590000  | 240000  | 15 | W | W | W | W | W | H | I | 5   | 11   | 6   | 13   | 18   | 829  | 642  |
| Gm09.VB.32 | Gm09 | 5590000  | 5610000  | 20000   | 0  | W | W | W | W | W | W | W | 0   | 3    | 0   | 3    | 3    | 2    | 8    |
| Gm09.VB.33 | Gm09 | 5610000  | 5740000  | 130000  | 7  | W | B | W | B | B | W | I | 7   | 632  | 7   | 627  | 588  | 13   | 604  |
| Gm09.VB.34 | Gm09 | 5740000  | 5830000  | 90000   | 6  | W | B | W | B | B | H | I | 3   | 403  | 3   | 390  | 400  | 391  | 246  |
| Gm09.VB.35 | Gm09 | 5830000  | 5940000  | 110000  | 9  | W | W | W | W | W | H | I | 0   | 1    | 0   | 0    | 0    | 357  | 253  |
| Gm09.VB.36 | Gm09 | 5940000  | 6060000  | 120000  | 7  | W | B | W | B | B | H | I | 7   | 269  | 7   | 251  | 232  | 250  | 304  |
| Gm09.VB.37 | Gm09 | 6060000  | 6080000  | 20000   | 0  | W | B | W | B | B | W | I | 0   | 211  | 0   | 205  | 192  | 1    | 99   |
| Gm09.VB.38 | Gm09 | 6080000  | 6180000  | 100000  | 9  | W | W | W | W | W | W | I | 15  | 14   | 14  | 11   | 12   | 9    | 267  |
| Gm09.VB.39 | Gm09 | 6180000  | 6190000  | 10000   | 1  | W | B | W | B | B | W | I | 0   | 22   | 0   | 22   | 20   | 0    | 17   |
| Gm09.VB.40 | Gm09 | 6190000  | 6310000  | 120000  | 5  | W | B | W | B | B | H | I | 6   | 722  | 6   | 702  | 701  | 121  | 422  |
| Gm09.VB.41 | Gm09 | 6310000  | 6910000  | 600000  | 32 | W | B | W | B | B | W | I | 17  | 1787 | 19  | 1761 | 1758 | 24   | 1542 |
| Gm09.VB.42 | Gm09 | 6910000  | 7060000  | 150000  | 6  | W | B | W | W | B | W | I | 4   | 343  | 5   | 4    | 332  | 6    | 407  |
| Gm09.VB.43 | Gm09 | 7060000  | 7170000  | 110000  | 9  | W | B | W | W | B | H | I | 1   | 279  | 1   | 1    | 276  | 78   | 639  |
| Gm09.VB.44 | Gm09 | 7170000  | 7200000  | 30000   | 2  | W | B | W | W | D | W | I | 4   | 69   | 7   | 8    | 43   | 2    | 106  |
| Gm09.VB.45 | Gm09 | 7200000  | 7320000  | 120000  | 9  | W | W | W | W | W | W | I | 5   | 17   | 3   | 3    | 21   | 2    | 359  |
| Gm09.VB.46 | Gm09 | 7320000  | 7390000  | 70000   | 4  | W | B | W | W | B | W | I | 1   | 635  | 1   | 1    | 615  | 2    | 379  |
| Gm09.VB.47 | Gm09 | 7390000  | 8020000  | 630000  | 22 | W | B | W | W | B | H | I | 47  | 2619 | 49  | 50   | 2512 | 1297 | 2015 |
| Gm09.VB.48 | Gm09 | 8020000  | 8150000  | 130000  | 3  | W | B | W | W | B | W | I | 2   | 801  | 2   | 2    | 778  | 20   | 689  |
| Gm09.VB.49 | Gm09 | 8150000  | 8680000  | 530000  | 17 | W | B | W | W | B | H | I | 33  | 2503 | 34  | 23   | 2448 | 348  | 2796 |
| Gm09.VB.50 | Gm09 | 8680000  | 8790000  | 110000  | 3  | W | B | W | W | B | W | I | 1   | 71   | 1   | 0    | 76   | 10   | 308  |
| Gm09.VB.51 | Gm09 | 8790000  | 9010000  | 220000  | 3  | W | B | W | W | B | H | I | 18  | 1196 | 16  | 14   | 1195 | 216  | 894  |
| Gm09.VB.52 | Gm09 | 9010000  | 9590000  | 580000  | 13 | W | B | W | W | B | W | I | 20  | 2037 | 21  | 21   | 2043 | 76   | 1251 |
| Gm09.VB.53 | Gm09 | 9590000  | 9620000  | 30000   | 1  | W | B | W | W | B | H | I | 4   | 349  | 4   | 4    | 343  | 250  | 34   |
| Gm09.VB.54 | Gm09 | 9620000  | 10270000 | 650000  | 18 | W | B | W | W | B | W | I | 38  | 2505 | 43  | 41   | 2468 | 74   | 1076 |
| Gm09.VB.55 | Gm09 | 10270000 | 10640000 | 370000  | 13 | W | B | W | W | B | H | I | 21  | 2853 | 21  | 22   | 2692 | 586  | 649  |
| Gm09.VB.56 | Gm09 | 10640000 | 11390000 | 750000  | 9  | W | B | W | W | B | W | I | 36  | 1911 | 42  | 37   | 1897 | 110  | 554  |
| Gm09.VB.57 | Gm09 | 11390000 | 11710000 | 320000  | 8  | W | B | W | W | B | H | I | 21  | 327  | 22  | 20   | 308  | 298  | 935  |
| Gm09.VB.58 | Gm09 | 11710000 | 12300000 | 590000  | 19 | W | B | W | W | B | W | I | 37  | 2324 | 34  | 36   | 2288 | 52   | 1173 |
| Gm09.VB.59 | Gm09 | 12300000 | 13060000 | 760000  | 18 | W | B | W | W | B | H | I | 41  | 4254 | 39  | 42   | 4191 | 1928 | 1453 |
| Gm09.VB.60 | Gm09 | 13060000 | 13820000 | 760000  | 9  | W | B | W | W | B | W | I | 58  | 2604 | 57  | 67   | 2611 | 129  | 2146 |
| Gm09.VB.61 | Gm09 | 13820000 | 14420000 | 600000  | 5  | W | B | W | W | B | H | I | 4   | 1551 | 7   | 7    | 1563 | 279  | 1257 |
| Gm09.VB.62 | Gm09 | 14420000 | 17440000 | 3020000 | 31 | W | B | W | W | B | W | I | 94  | 6403 | 99  | 87   | 6522 | 960  | 6895 |
| Gm09.VB.63 | Gm09 | 17440000 | 17580000 | 140000  | 1  | W | B | W | W | B | H | I | 1   | 530  | 3   | 1    | 525  | 212  | 308  |
| Gm09.VB.64 | Gm09 | 17580000 | 17680000 | 100000  | 3  | W | B | W | W | B | W | I | 15  | 133  | 14  | 9    | 125  | 29   | 113  |
| Gm09.VB.65 | Gm09 | 17680000 | 17780000 | 100000  | 0  | W | W | W | W | W | W | I | 8   | 28   | 8   | 7    | 26   | 13   | 61   |
| Gm09.VB.66 | Gm09 | 17780000 | 18450000 | 670000  | 12 | W | B | W | W | B | W | I | 32  | 2858 | 34  | 22   | 2867 | 109  | 1946 |
| Gm09.VB.67 | Gm09 | 18450000 | 18670000 | 220000  | 8  | W | B | W | W | B | H | I | 12  | 453  | 12  | 14   | 433  | 437  | 501  |
| Gm09.VB.68 | Gm09 | 18670000 | 20130000 | 1460000 | 22 | W | B | W | W | B | W | I | 72  | 4025 | 68  | 68   | 4052 | 241  | 1099 |
| Gm09.VB.69 | Gm09 | 20130000 | 20910000 | 780000  | 15 | W | B | W | W | B | H | I | 43  | 3002 | 39  | 34   | 2917 | 1245 | 1661 |
| Gm09.VB.70 | Gm09 | 20910000 | 21090000 | 180000  | 6  | W | B | W | W | B | W | I | 5   | 874  | 5   | 7    | 862  | 15   | 330  |
| Gm09.VB.71 | Gm09 | 21090000 | 25910000 | 4820000 | 43 | W | W | W | W | W | W | I | 390 | 677  | 399 | 387  | 657  | 614  | 7514 |
| Gm09.VB.72 | Gm09 | 25910000 | 26320000 | 410000  | 15 | W | B | W | W | B | W | I | 35  | 1741 | 33  | 32   | 1674 | 45   | 838  |
| Gm09.VB.73 | Gm09 | 26320000 | 26450000 | 130000  | 1  | W | W | W | W | W | W | I | 2   | 17   | 3   | 1    | 9    | 3    | 1058 |
| Gm09.VB.74 | Gm09 | 26450000 | 29630000 | 3180000 | 48 | W | B | W | W | B | W | I | 110 | 8656 | 87  | 85   | 8627 | 253  | 2002 |
| Gm09.VB.75 | Gm09 | 29630000 | 30130000 | 500000  | 16 | W | B | W | W | B | H | I | 36  | 2869 | 39  | 35   | 2713 | 471  | 1412 |
| Gm09.VB.76 | Gm09 | 30130000 | 30280000 | 150000  | 7  | W | W | W | W | W | W | I | 8   | 14   | 7   | 5    | 28   | 63   | 688  |
| Gm09.VB.77 | Gm09 | 30280000 | 30870000 | 590000  | 19 | W | W | W | W | W | W | I | 44  | 76   | 64  | 40   | 83   | 96   | 2034 |
| Gm09.VB.78 | Gm09 | 30870000 | 30900000 | 30000   | 1  | W | B | W | W | B | W | I | 0   | 78   | 1   | 1    | 70   | 4    | 99   |



|             |      |          |          |         |     |   |   |   |   |   |   |   |     |      |      |      |      |      |      |
|-------------|------|----------|----------|---------|-----|---|---|---|---|---|---|---|-----|------|------|------|------|------|------|
| Gm09.VB.79  | Gm09 | 30900000 | 30960000 | 60000   | 2   | W | W | W | W | W | H | I | 10  | 13   | 10   | 8    | 7    | 389  | 302  |
| Gm09.VB.80  | Gm09 | 30960000 | 33810000 | 2850000 | 88  | W | W | W | W | W | W | I | 148 | 221  | 165  | 152  | 213  | 210  | 8358 |
| Gm09.VB.81  | Gm09 | 33810000 | 34260000 | 450000  | 20  | W | W | W | W | W | H | I | 62  | 55   | 51   | 43   | 52   | 480  | 1108 |
| Gm09.VB.82  | Gm09 | 34260000 | 34310000 | 50000   | 0   | W | W | W | W | W | W | I | 1   | 13   | 1    | 2    | 13   | 14   | 257  |
| Gm09.VB.83  | Gm09 | 34310000 | 35050000 | 740000  | 34  | W | B | W | W | B | W | I | 27  | 4449 | 27   | 28   | 4345 | 56   | 1463 |
| Gm09.VB.84  | Gm09 | 35050000 | 35160000 | 110000  | 6   | W | W | W | W | W | W | I | 2   | 8    | 2    | 2    | 7    | 3    | 431  |
| Gm09.VB.85  | Gm09 | 35160000 | 35190000 | 30000   | 3   | W | B | W | W | D | H | I | 8   | 174  | 8    | 8    | 114  | 112  | 58   |
| Gm09.VB.86  | Gm09 | 35190000 | 35200000 | 10000   | 1   | W | W | W | W | W | H | I | 0   | 0    | 0    | 0    | 0    | 5    | 29   |
| Gm09.VB.87  | Gm09 | 35200000 | 35290000 | 90000   | 7   | W | W | W | W | W | W | I | 1   | 2    | 1    | 1    | 3    | 2    | 316  |
| Gm09.VB.88  | Gm09 | 35290000 | 35770000 | 480000  | 33  | W | B | W | W | B | W | I | 22  | 2859 | 20   | 19   | 2671 | 25   | 2142 |
| Gm09.VB.89  | Gm09 | 35770000 | 36480000 | 710000  | 61  | W | W | W | W | W | W | I | 22  | 42   | 27   | 25   | 35   | 28   | 2227 |
| Gm09.VB.90  | Gm09 | 36480000 | 36530000 | 50000   | 3   | W | W | W | W | W | H | I | 13  | 14   | 12   | 12   | 8    | 63   | 89   |
| Gm09.VB.91  | Gm09 | 36530000 | 36590000 | 60000   | 2   | W | B | W | W | B | W | I | 17  | 119  | 16   | 16   | 112  | 36   | 63   |
| Gm09.VB.92  | Gm09 | 36590000 | 36720000 | 130000  | 6   | W | B | W | W | B | W | I | 36  | 519  | 33   | 33   | 461  | 28   | 198  |
| Gm09.VB.93  | Gm09 | 36720000 | 37110000 | 390000  | 30  | W | B | W | W | B | H | I | 40  | 1373 | 39   | 38   | 1238 | 732  | 1063 |
| Gm09.VB.94  | Gm09 | 37110000 | 37220000 | 110000  | 10  | W | B | S | S | B | B | I | 10  | 276  | 576  | 563  | 243  | 256  | 183  |
| Gm09.VB.95  | Gm09 | 37220000 | 37650000 | 430000  | 31  | W | B | W | W | B | B | I | 37  | 1892 | 48   | 49   | 1692 | 1634 | 1143 |
| Gm09.VB.96  | Gm09 | 37650000 | 37950000 | 300000  | 22  | W | B | B | B | B | B | I | 8   | 1095 | 1151 | 1097 | 1030 | 966  | 767  |
| Gm09.VB.97  | Gm09 | 37950000 | 38330000 | 380000  | 30  | W | W | W | W | W | H | I | 6   | 19   | 14   | 17   | 13   | 176  | 1139 |
| Gm09.VB.98  | Gm09 | 38330000 | 38350000 | 20000   | 1   | W | B | W | W | B | B | I | 6   | 62   | 8    | 8    | 47   | 41   | 11   |
| Gm09.VB.99  | Gm09 | 38350000 | 38360000 | 10000   | 0   | W | W | S | S | W | W | I | 0   | 2    | 26   | 26   | 2    | 2    | 23   |
| Gm09.VB.100 | Gm09 | 38360000 | 38630000 | 270000  | 31  | W | B | W | W | B | H | I | 2   | 356  | 21   | 19   | 330  | 230  | 573  |
| Gm09.VB.101 | Gm09 | 38630000 | 38720000 | 90000   | 6   | W | B | B | B | B | B | I | 12  | 430  | 427  | 421  | 379  | 346  | 223  |
| Gm09.VB.102 | Gm09 | 38720000 | 38840000 | 120000  | 12  | W | W | S | S | W | H | I | 4   | 12   | 526  | 523  | 13   | 492  | 347  |
| Gm09.VB.103 | Gm09 | 38840000 | 38990000 | 150000  | 13  | W | B | S | S | B | B | I | 6   | 658  | 772  | 739  | 593  | 618  | 421  |
| Gm09.VB.104 | Gm09 | 38990000 | 39090000 | 100000  | 11  | W | B | S | S | B | W | I | 0   | 311  | 395  | 388  | 286  | 4    | 295  |
| Gm09.VB.105 | Gm09 | 39090000 | 39210000 | 120000  | 12  | W | W | S | S | W | W | I | 6   | 14   | 122  | 117  | 6    | 1    | 98   |
| Gm09.VB.106 | Gm09 | 39210000 | 39220000 | 10000   | 1   | W | B | S | S | B | W | I | 0   | 27   | 5    | 5    | 27   | 0    | 17   |
| Gm09.VB.107 | Gm09 | 39220000 | 39410000 | 190000  | 14  | W | B | W | W | B | W | I | 14  | 905  | 22   | 20   | 850  | 9    | 554  |
| Gm09.VB.108 | Gm09 | 39410000 | 39540000 | 130000  | 10  | W | B | S | S | B | W | I | 10  | 1010 | 626  | 613  | 943  | 2    | 293  |
| Gm09.VB.109 | Gm09 | 39540000 | 39780000 | 240000  | 23  | W | B | W | W | B | W | I | 3   | 1039 | 12   | 12   | 983  | 3    | 564  |
| Gm09.VB.110 | Gm09 | 39780000 | 39950000 | 170000  | 16  | W | B | W | W | B | H | I | 9   | 645  | 16   | 14   | 590  | 728  | 380  |
| Gm09.VB.111 | Gm09 | 39950000 | 40050000 | 100000  | 12  | W | W | W | W | W | H | I | 0   | 5    | 2    | 2    | 5    | 157  | 204  |
| Gm09.VB.112 | Gm09 | 40050000 | 40110000 | 60000   | 2   | W | W | W | W | W | W | I | 24  | 29   | 21   | 17   | 22   | 12   | 93   |
| Gm09.VB.113 | Gm09 | 40110000 | 40150000 | 40000   | 5   | W | B | W | W | B | W | W | 0   | 18   | 1    | 1    | 17   | 1    | 7    |
| Gm09.VB.114 | Gm09 | 40150000 | 42280000 | 2130000 | 239 | W | B | B | B | B | H | I | 112 | 9449 | 8942 | 8915 | 8661 | 8900 | 5548 |
| Gm09.VB.115 | Gm09 | 42280000 | 42630000 | 350000  | 39  | W | B | W | B | B | H | I | 8   | 1228 | 16   | 1220 | 1071 | 934  | 472  |
| Gm09.VB.116 | Gm09 | 42630000 | 43220000 | 590000  | 55  | W | B | S | B | B | H | I | 50  | 2322 | 2278 | 2284 | 2124 | 1588 | 1055 |
| Gm09.VB.117 | Gm09 | 43220000 | 43500000 | 280000  | 23  | W | B | W | B | B | H | I | 18  | 1044 | 22   | 1034 | 988  | 735  | 580  |
| Gm09.VB.118 | Gm09 | 43500000 | 43600000 | 100000  | 14  | W | W | W | W | W | H | I | 0   | 10   | 0    | 10   | 10   | 56   | 114  |
| Gm09.VB.119 | Gm09 | 43600000 | 43640000 | 40000   | 5   | W | B | W | B | B | H | I | 2   | 166  | 1    | 157  | 151  | 70   | 88   |
| Gm09.VB.120 | Gm09 | 43640000 | 45090000 | 1450000 | 161 | W | B | W | B | B | W | I | 99  | 3128 | 109  | 3080 | 2835 | 98   | 2412 |
| Gm09.VB.121 | Gm09 | 45090000 | 45220000 | 130000  | 8   | W | W | W | W | W | W | I | 3   | 13   | 2    | 12   | 12   | 5    | 403  |
| Gm09.VB.122 | Gm09 | 45220000 | 46660000 | 1440000 | 144 | W | B | W | B | B | W | I | 166 | 3121 | 163  | 3083 | 2806 | 149  | 2992 |
| Gm09.VB.123 | Gm09 | 46660000 | 46840000 | 180000  | 20  | W | B | W | B | B | B | I | 6   | 245  | 6    | 244  | 231  | 235  | 437  |
| Gm09.VB.124 | Gm09 | 46840000 | 46843750 | 3750    | 0   | W | B | W | G | G | G | I | 0   | 3    | 0    | 2    | 2    | 2    | 6    |
| Gm10.VB.1   | Gm10 | 0        | 470000   | 470000  | 41  | W | B | W | W | W | H | I | 12  | 813  | 14   | 14   | 10   | 628  | 840  |
| Gm10.VB.2   | Gm10 | 470000   | 1030000  | 560000  | 56  | W | W | W | W | W | H | I | 39  | 58   | 38   | 39   | 32   | 413  | 751  |
| Gm10.VB.3   | Gm10 | 1030000  | 1080000  | 50000   | 5   | W | B | W | W | W | W | I | 0   | 79   | 0    | 0    | 0    | 2    | 138  |
| Gm10.VB.4   | Gm10 | 1080000  | 1180000  | 100000  | 13  | W | W | W | W | W | W | I | 1   | 4    | 1    | 1    | 2    | 1    | 360  |
| Gm10.VB.5   | Gm10 | 1180000  | 1720000  | 540000  | 63  | W | B | W | W | W | W | I | 30  | 1165 | 32   | 27   | 23   | 25   | 1061 |
| Gm10.VB.6   | Gm10 | 1720000  | 1870000  | 150000  | 14  | W | W | W | W | W | W | I | 8   | 18   | 7    | 7    | 6    | 6    | 153  |
| Gm10.VB.7   | Gm10 | 1870000  | 2000000  | 130000  | 13  | W | B | W | W | W | W | I | 0   | 240  | 1    | 1    | 0    | 3    | 226  |
| Gm10.VB.8   | Gm10 | 2000000  | 2020000  | 20000   | 3   | W | B | W | W | W | H | I | 1   | 36   | 1    | 1    | 1    | 21   | 25   |
| Gm10.VB.9   | Gm10 | 2020000  | 2180000  | 160000  | 18  | W | W | W | W | W | W | I | 3   | 13   | 3    | 3    | 2    | 59   | 228  |
| Gm10.VB.10  | Gm10 | 2180000  | 2240000  | 60000   | 7   | W | W | W | W | W | W | I | 0   | 4    | 0    | 0    | 0    | 1    | 142  |
| Gm10.VB.11  | Gm10 | 2240000  | 2330000  | 90000   | 8   | W | B | W | W | W | W | I | 4   | 270  | 4    | 3    | 3    | 9    | 205  |
| Gm10.VB.12  | Gm10 | 2330000  | 2530000  | 200000  | 20  | W | B | W | W | W | H | I | 6   | 633  | 6    | 6    | 5    | 527  | 447  |
| Gm10.VB.13  | Gm10 | 2530000  | 2720000  | 190000  | 18  | W | W | W | W | W | W | I | 3   | 22   | 3    | 3    | 3    | 14   | 544  |
| Gm10.VB.14  | Gm10 | 2720000  | 2930000  | 210000  | 21  | W | B | W | W | W | H | I | 0   | 586  | 0    | 0    | 0    | 311  | 344  |
| Gm10.VB.15  | Gm10 | 2930000  | 3360000  | 430000  | 31  | W | B | W | W | W | W | I | 72  | 1384 | 74   | 67   | 46   | 61   | 940  |
| Gm10.VB.16  | Gm10 | 3360000  | 3470000  | 110000  | 12  | W | B | W | W | W | H | I | 9   | 294  | 9    | 9    | 9    | 194  | 283  |
| Gm10.VB.17  | Gm10 | 3470000  | 3500000  | 30000   | 4   | W | B | W | W | W | W | I | 0   | 72   | 0    | 0    | 0    | 0    | 106  |
| Gm10.VB.18  | Gm10 | 3500000  | 3760000  | 260000  | 27  | W | W | W | W | W | W | I | 34  | 42   | 33   | 32   | 30   | 36   | 443  |
| Gm10.VB.19  | Gm10 | 3760000  | 3850000  | 90000   | 9   | W | W | W | W | W | W | I | 5   | 7    | 5    | 5    | 3    | 20   | 247  |
| Gm10.VB.20  | Gm10 | 3850000  | 4220000  | 370000  | 39  | W | B | W | W | W | H | I | 25  | 1863 | 21   | 20   | 21   | 1587 | 1274 |
| Gm10.VB.21  | Gm10 | 4220000  | 4260000  | 40000   | 3   | W | B | W | B | W | H | I | 1   | 173  | 2    | 168  | 1    | 107  | 107  |
| Gm10.VB.22  | Gm10 | 4260000  | 4380000  | 120000  | 10  | W | W | W | W | W | W | I | 6   | 11   | 6    | 10   | 7    | 11   | 369  |
| Gm10.VB.23  | Gm10 | 4380000  | 4450000  | 70000   | 7   | W | B | W | B | W | B | I | 6   | 265  | 8    | 260  | 4    | 234  | 238  |
| Gm10.VB.24  | Gm10 | 4450000  | 4780000  | 330000  | 27  | W | B | W | W | W | B | I | 11  | 1284 | 11   | 11   | 10   | 1213 | 1090 |
| Gm10.VB.25  | Gm10 | 4780000  | 4960000  | 180000  | 14  | W | W | W | W | W | W | I | 7   | 10   | 7    | 6    | 6    | 15   | 541  |
| Gm10.VB.26  | Gm10 | 4960000  | 5140000  | 180000  | 11  | W | W | W | W | W | H | I | 10  | 16   | 6    | 7    | 1    | 170  | 485  |
| Gm10.VB.27  | Gm10 | 5140000  | 5230000  | 90000   | 10  | W | W | W | W | W | W | I | 22  | 26   | 20   | 17   | 13   | 22   | 163  |
| Gm10.VB.28  | Gm10 | 5230000  | 5240000  | 10000   | 1   | W | B | W | W | W | W | I | 0   | 31   | 0    | 0    | 0    | 1    | 23   |
| Gm10.VB.29  | Gm10 | 5240000  | 5480000  | 240000  | 18  | W | B | W | W | W | H | I | 6   | 1082 | 6    | 7    | 6    | 385  | 534  |
| Gm10.VB.30  | Gm10 | 5480000  | 5570000  | 90000   | 6   | W | B | W | W | B | H | I | 10  | 382  | 8    | 7    | 370  | 266  | 262  |
| Gm10.VB.31  | Gm10 | 5570000  | 5630000  | 60000   | 3   | W | B | W | W | B | W | I | 1   | 121  | 1    | 0    | 106  | 7    | 158  |
| Gm10.VB.32  | Gm10 | 5630000  | 5900000  | 270000  | 12  | W | W | W | W | W | W | I | 11  | 38   | 11   | 12   | 37   | 34   | 536  |

|             |      |          |          |         |     |   |   |   |   |   |   |     |     |      |      |      |      |      |       |
|-------------|------|----------|----------|---------|-----|---|---|---|---|---|---|-----|-----|------|------|------|------|------|-------|
| Gm10.VB.33  | Gm10 | 5900000  | 6010000  | 110000  | 12  | W | B | W | W | B | W | I   | 4   | 144  | 8    | 8    | 144  | 11   | 502   |
| Gm10.VB.34  | Gm10 | 6010000  | 6020000  | 10000   | 0   | W | B | W | B | D | W | I   | 0   | 14   | 0    | 15   | 10   | 5    | 7     |
| Gm10.VB.35  | Gm10 | 6020000  | 6030000  | 10000   | 2   | W | B | W | B | B | H | I   | 3   | 31   | 2    | 30   | 28   | 8    | 26    |
| Gm10.VB.36  | Gm10 | 6030000  | 6140000  | 110000  | 7   | W | W | W | W | W | H | I   | 4   | 12   | 14   | 13   | 9    | 75   | 440   |
| Gm10.VB.37  | Gm10 | 6140000  | 6510000  | 370000  | 23  | W | W | S | S | W | H | I   | 47  | 62   | 1205 | 1167 | 47   | 304  | 1071  |
| Gm10.VB.38  | Gm10 | 6510000  | 6610000  | 100000  | 5   | W | B | S | S | B | H | I   | 8   | 308  | 413  | 426  | 292  | 237  | 300   |
| Gm10.VB.39  | Gm10 | 6610000  | 6670000  | 60000   | 3   | W | B | W | W | B | W | I   | 30  | 319  | 27   | 26   | 272  | 14   | 39    |
| Gm10.VB.40  | Gm10 | 6670000  | 7090000  | 420000  | 23  | W | W | W | W | W | W | I   | 14  | 45   | 15   | 15   | 43   | 26   | 1403  |
| Gm10.VB.41  | Gm10 | 7090000  | 7130000  | 40000   | 3   | W | B | W | W | B | H | I   | 2   | 262  | 2    | 2    | 263  | 20   | 193   |
| Gm10.VB.42  | Gm10 | 7130000  | 7310000  | 180000  | 15  | W | W | W | W | W | W | I   | 7   | 18   | 7    | 9    | 10   | 7    | 424   |
| Gm10.VB.43  | Gm10 | 7310000  | 7340000  | 30000   | 1   | W | B | W | B | B | W | I   | 1   | 174  | 3    | 159  | 165  | 9    | 106   |
| Gm10.VB.44  | Gm10 | 7340000  | 7470000  | 130000  | 6   | W | W | W | W | W | W | I   | 16  | 20   | 13   | 16   | 20   | 24   | 213   |
| Gm10.VB.45  | Gm10 | 7470000  | 7560000  | 90000   | 5   | W | B | W | W | B | B | I   | 0   | 306  | 0    | 0    | 310  | 307  | 65    |
| Gm10.VB.46  | Gm10 | 7560000  | 7690000  | 130000  | 10  | W | W | W | W | W | H | I   | 1   | 5    | 1    | 1    | 5    | 64   | 314   |
| Gm10.VB.47  | Gm10 | 7690000  | 8670000  | 980000  | 23  | W | W | W | W | W | W | I   | 44  | 73   | 47   | 37   | 74   | 69   | 634   |
| Gm10.VB.48  | Gm10 | 8670000  | 9470000  | 800000  | 20  | W | B | W | W | B | B | I   | 27  | 3717 | 33   | 32   | 3663 | 3667 | 3697  |
| Gm10.VB.49  | Gm10 | 9470000  | 9580000  | 110000  | 2   | W | W | W | W | W | W | I   | 0   | 0    | 0    | 0    | 0    | 38   | 120   |
| Gm10.VB.50  | Gm10 | 9580000  | 9840000  | 260000  | 7   | W | W | W | W | W | W | I   | 10  | 9    | 10   | 10   | 7    | 24   | 914   |
| Gm10.VB.51  | Gm10 | 9840000  | 11130000 | 1290000 | 36  | W | W | W | W | W | H | I   | 82  | 78   | 80   | 85   | 67   | 828  | 5102  |
| Gm10.VB.52  | Gm10 | 11130000 | 11770000 | 640000  | 14  | W | B | B | B | B | W | I   | 32  | 3900 | 3952 | 3897 | 3831 | 57   | 1160  |
| Gm10.VB.53  | Gm10 | 11770000 | 13890000 | 2120000 | 45  | W | B | B | B | B | H | I   | 132 | 9743 | 9785 | 9608 | 9520 | 6121 | 6822  |
| Gm10.VB.54  | Gm10 | 13890000 | 14220000 | 330000  | 2   | W | B | B | G | D | W | W   | 1   | 141  | 142  | 140  | 147  | 107  | 62    |
| Gm10.VB.55  | Gm10 | 14220000 | 16810000 | 2590000 | 30  | W | B | W | W | B | W | I   | 131 | 9809 | 213  | 188  | 9967 | 344  | 1406  |
| Gm10.VB.56  | Gm10 | 16810000 | 17430000 | 620000  | 9   | W | B | B | B | B | W | I   | 35  | 3371 | 3305 | 3311 | 3409 | 96   | 265   |
| Gm10.VB.57  | Gm10 | 17430000 | 19310000 | 1880000 | 31  | W | B | B | B | B | H | I   | 75  | 4908 | 5034 | 4928 | 4981 | 2200 | 1394  |
| Gm10.VB.58  | Gm10 | 19310000 | 21520000 | 2210000 | 24  | W | B | B | B | B | W | I   | 110 | 3367 | 3380 | 3335 | 3296 | 545  | 1117  |
| Gm10.VB.59  | Gm10 | 21520000 | 23210000 | 1690000 | 8   | W | B | B | B | B | H | I   | 84  | 1370 | 1382 | 1353 | 1367 | 804  | 1055  |
| Gm10.VB.60  | Gm10 | 23210000 | 23320000 | 110000  | 0   | W | W | W | W | W | W | W   | 4   | 34   | 38   | 43   | 33   | 20   | 25    |
| Gm10.VB.61  | Gm10 | 23320000 | 24100000 | 780000  | 4   | W | B | B | B | B | H | I   | 43  | 669  | 667  | 653  | 669  | 406  | 528   |
| Gm10.VB.62  | Gm10 | 24100000 | 24240000 | 140000  | 0   | W | B | B | B | B | W | W   | 11  | 70   | 69   | 69   | 73   | 38   | 61    |
| Gm10.VB.63  | Gm10 | 24240000 | 24970000 | 730000  | 5   | W | B | B | B | B | H | I   | 31  | 604  | 600  | 579  | 633  | 375  | 451   |
| Gm10.VB.64  | Gm10 | 24970000 | 25230000 | 260000  | 1   | W | W | W | W | W | W | W   | 19  | 36   | 37   | 36   | 44   | 46   | 28    |
| Gm10.VB.65  | Gm10 | 25230000 | 25270000 | 40000   | 0   | W | W | S | S | S | W | W   | 1   | 17   | 21   | 23   | 22   | 14   | 16    |
| Gm10.VB.66  | Gm10 | 25270000 | 25430000 | 160000  | 0   | W | W | W | W | W | W | W   | 11  | 47   | 40   | 45   | 44   | 35   | 31    |
| Gm10.VB.67  | Gm10 | 25430000 | 25590000 | 160000  | 0   | W | W | W | W | W | W | W   | 4   | 28   | 43   | 39   | 42   | 42   | 26    |
| Gm10.VB.68  | Gm10 | 25590000 | 25600000 | 10000   | 0   | W | B | W | W | D | H | I   | 2   | 6    | 3    | 5    | 6    | 7    | 5     |
| Gm10.VB.69  | Gm10 | 25600000 | 27980000 | 2380000 | 22  | W | B | B | B | B | H | I   | 120 | 1698 | 1701 | 1650 | 1696 | 2014 | 1200  |
| Gm10.VB.70  | Gm10 | 27980000 | 28740000 | 760000  | 18  | W | B | W | W | B | W | I   | 33  | 3420 | 56   | 66   | 3436 | 98   | 694   |
| Gm10.VB.71  | Gm10 | 28740000 | 35400000 | 6660000 | 109 | W | W | W | W | W | W | I   | 275 | 375  | 390  | 361  | 376  | 361  | 20111 |
| Gm10.VB.72  | Gm10 | 35400000 | 37180000 | 1780000 | 64  | W | B | B | B | B | B | I   | 56  | 3857 | 3864 | 3796 | 3675 | 3691 | 2727  |
| Gm10.VB.73  | Gm10 | 37180000 | 37230000 | 50000   | 3   | W | W | W | W | W | W | I   | 20  | 21   | 27   | 24   | 22   | 22   | 153   |
| Gm10.VB.74  | Gm10 | 37230000 | 37530000 | 300000  | 24  | W | W | W | W | W | W | I   | 21  | 39   | 44   | 37   | 31   | 31   | 1198  |
| Gm10.VB.75  | Gm10 | 37530000 | 37620000 | 90000   | 6   | W | W | W | W | W | H | I   | 26  | 25   | 27   | 26   | 27   | 407  | 349   |
| Gm10.VB.76  | Gm10 | 37620000 | 37720000 | 100000  | 7   | W | W | W | W | W | W | I   | 5   | 7    | 7    | 7    | 6    | 12   | 341   |
| Gm10.VB.77  | Gm10 | 37720000 | 38530000 | 810000  | 81  | W | W | W | W | W | H | I   | 29  | 74   | 57   | 51   | 65   | 2851 | 2716  |
| Gm10.VB.78  | Gm10 | 38530000 | 38550000 | 20000   | 0   | W | B | B | W | B | H | I   | 1   | 66   | 65   | 1    | 63   | 119  | 62    |
| Gm10.VB.79  | Gm10 | 38550000 | 38650000 | 100000  | 10  | W | B | B | W | B | W | I   | 0   | 335  | 329  | 0    | 324  | 6    | 272   |
| Gm10.VB.80  | Gm10 | 38650000 | 38970000 | 320000  | 32  | W | B | B | W | B | B | I   | 38  | 1500 | 1506 | 35   | 1384 | 1420 | 1128  |
| Gm10.VB.81  | Gm10 | 38970000 | 39260000 | 290000  | 28  | W | W | W | W | W | W | I   | 45  | 43   | 45   | 39   | 40   | 43   | 769   |
| Gm10.VB.82  | Gm10 | 39260000 | 39270000 | 10000   | 1   | W | B | B | B | B | B | I   | 0   | 21   | 22   | 21   | 22   | 21   | 17    |
| Gm10.VB.83  | Gm10 | 39270000 | 39400000 | 130000  | 9   | W | W | S | W | S | W | I   | 3   | 6    | 184  | 6    | 180  | 30   | 274   |
| Gm10.VB.84  | Gm10 | 39400000 | 39790000 | 390000  | 34  | W | B | S | B | S | S | I   | 12  | 1404 | 1142 | 1378 | 1080 | 1061 | 1253  |
| Gm10.VB.85  | Gm10 | 39790000 | 40070000 | 280000  | 27  | W | B | S | B | S | W | I   | 35  | 747  | 582  | 744  | 536  | 42   | 554   |
| Gm10.VB.86  | Gm10 | 40070000 | 40080000 | 10000   | 1   | W | B | S | B | S | H | I   | 6   | 8    | 21   | 8    | 19   | 17   | 12    |
| Gm10.VB.87  | Gm10 | 40080000 | 40100000 | 20000   | 1   | W | W | S | W | S | H | I   | 0   | 0    | 100  | 0    | 98   | 66   | 47    |
| Gm10.VB.88  | Gm10 | 40100000 | 40230000 | 130000  | 13  | W | W | S | W | D | W | I   | 5   | 15   | 187  | 15   | 202  | 9    | 229   |
| Gm10.VB.89  | Gm10 | 40230000 | 40290000 | 60000   | 6   | W | B | S | B | S | W | I   | 0   | 98   | 462  | 98   | 444  | 1    | 96    |
| Gm10.VB.90  | Gm10 | 40290000 | 40400000 | 110000  | 3   | W | B | W | B | W | W | I   | 34  | 129  | 46   | 123  | 31   | 24   | 90    |
| Gm10.VB.91  | Gm10 | 40400000 | 40410000 | 10000   | 0   | W | W | S | S | W | W | I   | 3   | 7    | 50   | 51   | 3    | 2    | 24    |
| Gm10.VB.92  | Gm10 | 40410000 | 40480000 | 70000   | 8   | W | B | W | B | W | W | I   | 0   | 40   | 0    | 40   | 0    | 1    | 44    |
| Gm10.VB.93  | Gm10 | 40480000 | 40640000 | 160000  | 17  | W | W | W | W | W | W | I   | 12  | 21   | 20   | 24   | 16   | 27   | 570   |
| Gm10.VB.94  | Gm10 | 40640000 | 40660000 | 20000   | 2   | W | B | W | B | W | B | I   | 0   | 85   | 0    | 84   | 0    | 85   | 70    |
| Gm10.VB.95  | Gm10 | 40660000 | 40670000 | 10000   | 2   | W | W | W | G | D | H | I   | 2   | 4    | 2    | 8    | 9    | 11   | 42    |
| Gm10.VB.96  | Gm10 | 40670000 | 41000000 | 330000  | 28  | W | W | W | W | W | W | I   | 37  | 52   | 39   | 50   | 26   | 51   | 730   |
| Gm10.VB.97  | Gm10 | 41000000 | 41030000 | 30000   | 3   | W | W | W | W | W | H | I   | 0   | 2    | 0    | 2    | 0    | 19   | 64    |
| Gm10.VB.98  | Gm10 | 41030000 | 41120000 | 90000   | 10  | W | B | W | B | W | B | I   | 1   | 120  | 2    | 117  | 1    | 120  | 122   |
| Gm10.VB.99  | Gm10 | 41120000 | 41620000 | 500000  | 43  | W | B | W | B | W | W | I   | 40  | 1554 | 54   | 1520 | 37   | 52   | 1143  |
| Gm10.VB.100 | Gm10 | 41620000 | 41870000 | 250000  | 25  | W | W | W | W | W | W | I   | 15  | 25   | 21   | 25   | 12   | 20   | 659   |
| Gm10.VB.101 | Gm10 | 41870000 | 42240000 | 370000  | 44  | W | B | W | B | W | W | I   | 5   | 943  | 30   | 918  | 27   | 29   | 666   |
| Gm10.VB.102 | Gm10 | 42240000 | 42470000 | 230000  | 21  | W | B | B | B | B | B | I   | 50  | 627  | 724  | 627  | 622  | 620  | 462   |
| Gm10.VB.103 | Gm10 | 42470000 | 42660000 | 190000  | 15  | W | W | W | W | W | W | I   | 67  | 78   | 83   | 74   | 73   | 74   | 305   |
| Gm10.VB.104 | Gm10 | 42660000 | 42760000 | 100000  | 9   | W | B | B | B | B | B | I   | 4   | 272  | 281  | 271  | 230  | 241  | 109   |
| Gm10.VB.105 | Gm10 | 42760000 | 42860000 | 100000  | 6   | W | W | W | W | W | W | I   | 14  | 16   | 17   | 19   | 10   | 13   | 160   |
| Gm10.VB.106 | Gm10 | 42860000 | 42870000 | 10000   | 1   | W | W | S | S | W | S | W   | 0   | 3    | 5    | 5    | 4    | 5    | 3     |
| Gm10.VB.107 | Gm10 | 42870000 | 43060000 | 190000  | 17  | W | B | B | B | B | B | I   | 34  | 404  | 418  | 403  | 361  | 370  | 408   |
| Gm10.VB.108 | Gm10 | 43060000 | 43690000 | 630000  | 44  | W | W | W | W | W | W | I   | 50  | 88   | 91   | 89   | 76   | 76   | 1054  |
| Gm10.VB.109 | Gm10 | 43690000 | 44180000 | 490000  | 40  | W | B | B | B | B | B | I   | 57  | 1278 | 1290 | 1254 | 1176 | 1210 | 1037  |
| Gm10.VB.110 | Gm10 | 44180000 | 44770000 | 590000  | 61  | W | B | W | B | W | B | I</ |     |      |      |      |      |      |       |

|             |      |          |          |         |     |   |   |   |   |   |   |   |     |      |      |      |      |      |      |
|-------------|------|----------|----------|---------|-----|---|---|---|---|---|---|---|-----|------|------|------|------|------|------|
| Gm10.VB.111 | Gm10 | 44770000 | 44940000 | 170000  | 23  | W | W | W | W | W | W | I | 3   | 8    | 2    | 7    | 3    | 7    | 349  |
| Gm10.VB.112 | Gm10 | 44940000 | 44970000 | 30000   | 1   | W | B | W | B | W | B | I | 7   | 74   | 7    | 76   | 6    | 68   | 56   |
| Gm10.VB.113 | Gm10 | 44970000 | 45230000 | 260000  | 20  | W | W | W | W | W | W | I | 12  | 26   | 11   | 23   | 11   | 20   | 419  |
| Gm10.VB.114 | Gm10 | 45230000 | 45250000 | 20000   | 2   | W | B | W | B | W | B | I | 1   | 83   | 1    | 84   | 1    | 67   | 81   |
| Gm10.VB.115 | Gm10 | 45250000 | 45360000 | 110000  | 12  | W | W | W | W | W | W | I | 3   | 17   | 3    | 15   | 0    | 15   | 305  |
| Gm10.VB.116 | Gm10 | 45360000 | 45410000 | 50000   | 3   | W | B | W | B | W | B | I | 2   | 161  | 2    | 135  | 2    | 130  | 149  |
| Gm10.VB.117 | Gm10 | 45410000 | 45620000 | 210000  | 26  | W | W | W | W | W | W | I | 23  | 25   | 21   | 26   | 11   | 15   | 550  |
| Gm10.VB.118 | Gm10 | 45620000 | 45760000 | 140000  | 16  | W | B | W | B | W | B | I | 0   | 216  | 0    | 214  | 0    | 196  | 270  |
| Gm10.VB.119 | Gm10 | 45760000 | 45860000 | 100000  | 6   | W | W | W | W | W | W | I | 11  | 15   | 10   | 15   | 10   | 15   | 187  |
| Gm10.VB.120 | Gm10 | 45860000 | 46390000 | 530000  | 56  | W | B | W | B | W | B | I | 29  | 1397 | 31   | 1345 | 16   | 1319 | 1039 |
| Gm10.VB.121 | Gm10 | 46390000 | 46910000 | 520000  | 51  | W | W | W | W | W | W | I | 56  | 74   | 59   | 76   | 37   | 45   | 980  |
| Gm10.VB.122 | Gm10 | 46910000 | 46920000 | 10000   | 1   | W | W | S | G | W | W | I | 3   | 5    | 10   | 41   | 1    | 1    | 24   |
| Gm10.VB.123 | Gm10 | 46920000 | 47070000 | 150000  | 15  | W | W | W | W | W | W | I | 19  | 22   | 20   | 22   | 18   | 17   | 241  |
| Gm10.VB.124 | Gm10 | 47070000 | 47110000 | 40000   | 4   | W | W | W | G | W | W | I | 1   | 1    | 1    | 86   | 1    | 1    | 91   |
| Gm10.VB.125 | Gm10 | 47110000 | 47760000 | 650000  | 72  | W | B | W | G | W | W | I | 51  | 1039 | 55   | 2378 | 36   | 40   | 1415 |
| Gm10.VB.126 | Gm10 | 47760000 | 48480000 | 720000  | 95  | W | B | S | S | W | W | I | 52  | 1887 | 3015 | 2947 | 38   | 42   | 1574 |
| Gm10.VB.127 | Gm10 | 48480000 | 48720000 | 240000  | 22  | W | W | S | S | W | W | I | 54  | 58   | 1090 | 1067 | 35   | 47   | 539  |
| Gm10.VB.128 | Gm10 | 48720000 | 49100000 | 380000  | 27  | W | W | W | W | W | W | I | 39  | 42   | 41   | 39   | 23   | 19   | 1002 |
| Gm10.VB.129 | Gm10 | 49100000 | 49240000 | 140000  | 13  | W | B | W | W | W | W | I | 1   | 333  | 1    | 1    | 1    | 1    | 240  |
| Gm10.VB.130 | Gm10 | 49240000 | 49560000 | 320000  | 40  | W | W | W | W | W | W | I | 23  | 36   | 23   | 28   | 15   | 15   | 580  |
| Gm10.VB.131 | Gm10 | 49560000 | 49750000 | 190000  | 20  | W | B | W | W | W | W | I | 9   | 498  | 9    | 9    | 7    | 9    | 466  |
| Gm10.VB.132 | Gm10 | 49750000 | 49990000 | 240000  | 29  | W | W | W | W | W | W | I | 18  | 24   | 19   | 16   | 14   | 15   | 517  |
| Gm10.VB.133 | Gm10 | 49990000 | 50540000 | 550000  | 70  | W | B | W | W | W | W | I | 7   | 1825 | 6    | 5    | 7    | 9    | 1388 |
| Gm10.VB.134 | Gm10 | 50540000 | 50650000 | 110000  | 9   | W | W | W | W | W | W | I | 4   | 8    | 4    | 5    | 4    | 7    | 71   |
| Gm10.VB.135 | Gm10 | 50650000 | 50960000 | 310000  | 31  | W | B | W | W | W | W | I | 30  | 1078 | 31   | 26   | 27   | 36   | 500  |
| Gm10.VB.136 | Gm10 | 50960000 | 50969635 | 9635    | 0   | W | B | W | W | W | W | I | 0   | 31   | 0    | 0    | 0    | 0    | 26   |
| Gm11.VB.1   | Gm11 | 0        | 220000   | 220000  | 30  | W | W | W | W | W | H | I | 19  | 13   | 18   | 14   | 14   | 310  | 617  |
| Gm11.VB.2   | Gm11 | 220000   | 430000   | 210000  | 25  | W | W | W | W | W | W | I | 10  | 4    | 4    | 4    | 2    | 11   | 372  |
| Gm11.VB.3   | Gm11 | 430000   | 720000   | 290000  | 37  | W | W | W | W | W | H | I | 12  | 13   | 12   | 12   | 12   | 796  | 501  |
| Gm11.VB.4   | Gm11 | 720000   | 940000   | 220000  | 33  | W | W | W | W | W | W | I | 4   | 4    | 4    | 4    | 3    | 12   | 309  |
| Gm11.VB.5   | Gm11 | 940000   | 1070000  | 130000  | 17  | W | W | W | W | W | H | I | 0   | 0    | 0    | 0    | 1    | 60   | 243  |
| Gm11.VB.6   | Gm11 | 1070000  | 1200000  | 130000  | 14  | W | W | W | W | W | W | I | 2   | 2    | 2    | 2    | 2    | 10   | 187  |
| Gm11.VB.7   | Gm11 | 1200000  | 1260000  | 60000   | 8   | W | W | W | W | W | H | I | 0   | 5    | 0    | 0    | 6    | 46   | 100  |
| Gm11.VB.8   | Gm11 | 1260000  | 1440000  | 180000  | 23  | W | B | W | W | B | H | I | 4   | 315  | 1    | 4    | 272  | 200  | 171  |
| Gm11.VB.9   | Gm11 | 1440000  | 1600000  | 160000  | 18  | W | W | W | W | W | W | I | 12  | 24   | 12   | 12   | 25   | 22   | 298  |
| Gm11.VB.10  | Gm11 | 1600000  | 1740000  | 140000  | 19  | W | B | W | W | B | B | I | 4   | 253  | 9    | 3    | 245  | 243  | 133  |
| Gm11.VB.11  | Gm11 | 1740000  | 1940000  | 200000  | 20  | W | W | W | W | W | W | I | 4   | 6    | 8    | 1    | 7    | 78   | 327  |
| Gm11.VB.12  | Gm11 | 1940000  | 2100000  | 160000  | 20  | W | W | W | W | W | W | I | 7   | 5    | 6    | 6    | 4    | 9    | 420  |
| Gm11.VB.13  | Gm11 | 2100000  | 2180000  | 80000   | 10  | W | W | W | W | W | H | I | 20  | 13   | 18   | 11   | 16   | 56   | 188  |
| Gm11.VB.14  | Gm11 | 2180000  | 2530000  | 350000  | 44  | W | W | W | W | W | W | I | 13  | 13   | 12   | 13   | 14   | 15   | 590  |
| Gm11.VB.15  | Gm11 | 2530000  | 2650000  | 120000  | 16  | W | W | W | W | W | H | I | 2   | 2    | 2    | 3    | 1    | 54   | 233  |
| Gm11.VB.16  | Gm11 | 2650000  | 3040000  | 390000  | 43  | W | W | W | W | W | W | I | 18  | 18   | 18   | 16   | 13   | 37   | 754  |
| Gm11.VB.17  | Gm11 | 3040000  | 3120000  | 80000   | 10  | W | W | W | W | W | H | I | 1   | 2    | 1    | 1    | 1    | 48   | 132  |
| Gm11.VB.18  | Gm11 | 3120000  | 3330000  | 210000  | 21  | W | W | W | W | W | W | I | 5   | 10   | 5    | 5    | 9    | 11   | 352  |
| Gm11.VB.19  | Gm11 | 3330000  | 3440000  | 110000  | 7   | W | B | W | W | B | B | I | 7   | 249  | 8    | 7    | 223  | 218  | 108  |
| Gm11.VB.20  | Gm11 | 3440000  | 3590000  | 150000  | 22  | W | W | W | W | W | W | I | 3   | 15   | 2    | 3    | 10   | 7    | 203  |
| Gm11.VB.21  | Gm11 | 3590000  | 3780000  | 190000  | 19  | W | B | W | W | B | B | I | 28  | 394  | 29   | 30   | 372  | 370  | 181  |
| Gm11.VB.22  | Gm11 | 3780000  | 3790000  | 10000   | 1   | W | B | W | W | W | W | W | 0   | 5    | 0    | 0    | 4    | 4    | 0    |
| Gm11.VB.23  | Gm11 | 3790000  | 3900000  | 110000  | 12  | W | W | W | W | W | W | W | 0   | 14   | 0    | 1    | 11   | 10   | 31   |
| Gm11.VB.24  | Gm11 | 3900000  | 4150000  | 250000  | 30  | W | B | W | W | B | W | I | 12  | 202  | 10   | 11   | 173  | 11   | 366  |
| Gm11.VB.25  | Gm11 | 4150000  | 4550000  | 400000  | 48  | W | B | W | W | B | H | I | 15  | 675  | 15   | 17   | 628  | 394  | 408  |
| Gm11.VB.26  | Gm11 | 4550000  | 4680000  | 130000  | 16  | W | B | W | B | B | H | I | 3   | 296  | 3    | 288  | 279  | 210  | 225  |
| Gm11.VB.27  | Gm11 | 4680000  | 4800000  | 120000  | 14  | W | B | W | B | B | W | I | 21  | 435  | 17   | 418  | 396  | 30   | 107  |
| Gm11.VB.28  | Gm11 | 4800000  | 5290000  | 490000  | 65  | W | B | W | B | B | H | I | 20  | 1327 | 19   | 1310 | 1212 | 1052 | 1271 |
| Gm11.VB.29  | Gm11 | 5290000  | 5310000  | 20000   | 3   | W | W | W | W | W | H | I | 0   | 0    | 0    | 0    | 0    | 18   | 79   |
| Gm11.VB.30  | Gm11 | 5310000  | 5410000  | 100000  | 11  | W | W | W | W | W | W | I | 3   | 4    | 1    | 3    | 4    | 1    | 236  |
| Gm11.VB.31  | Gm11 | 5410000  | 5460000  | 50000   | 7   | W | B | W | B | B | W | I | 1   | 203  | 1    | 196  | 197  | 4    | 106  |
| Gm11.VB.32  | Gm11 | 5460000  | 5650000  | 190000  | 19  | W | W | W | W | W | W | I | 25  | 23   | 27   | 27   | 20   | 19   | 345  |
| Gm11.VB.33  | Gm11 | 5650000  | 5810000  | 160000  | 16  | W | W | W | W | W | H | I | 3   | 3    | 3    | 3    | 3    | 77   | 330  |
| Gm11.VB.34  | Gm11 | 5810000  | 5840000  | 30000   | 3   | W | B | W | B | W | B | I | 0   | 130  | 0    | 127  | 0    | 145  | 98   |
| Gm11.VB.35  | Gm11 | 5840000  | 6030000  | 190000  | 25  | W | B | W | B | W | W | I | 1   | 508  | 1    | 504  | 0    | 7    | 482  |
| Gm11.VB.36  | Gm11 | 6030000  | 6400000  | 370000  | 43  | W | B | W | B | W | H | I | 30  | 1204 | 31   | 1185 | 24   | 946  | 753  |
| Gm11.VB.37  | Gm11 | 6400000  | 6540000  | 140000  | 19  | W | W | W | W | W | H | I | 5   | 18   | 5    | 18   | 5    | 65   | 314  |
| Gm11.VB.38  | Gm11 | 6540000  | 6620000  | 80000   | 7   | W | B | W | B | W | H | I | 5   | 78   | 4    | 77   | 3    | 96   | 164  |
| Gm11.VB.39  | Gm11 | 6620000  | 6980000  | 360000  | 38  | W | B | W | B | W | W | I | 32  | 891  | 27   | 888  | 29   | 31   | 855  |
| Gm11.VB.40  | Gm11 | 6980000  | 7150000  | 170000  | 20  | W | W | W | W | W | W | I | 0   | 7    | 12   | 6    | 11   | 15   | 304  |
| Gm11.VB.41  | Gm11 | 7150000  | 7240000  | 90000   | 12  | W | W | W | W | W | W | I | 0   | 1    | 3    | 1    | 3    | 31   | 172  |
| Gm11.VB.42  | Gm11 | 7240000  | 7460000  | 220000  | 25  | W | B | B | B | B | B | I | 6   | 790  | 797  | 794  | 729  | 741  | 480  |
| Gm11.VB.43  | Gm11 | 7460000  | 7580000  | 120000  | 16  | W | B | W | B | W | W | I | 13  | 543  | 13   | 539  | 7    | 5    | 350  |
| Gm11.VB.44  | Gm11 | 7580000  | 7600000  | 20000   | 3   | W | B | W | B | W | H | I | 0   | 68   | 0    | 57   | 0    | 19   | 32   |
| Gm11.VB.45  | Gm11 | 7600000  | 7850000  | 250000  | 28  | W | W | W | W | W | H | I | 7   | 12   | 7    | 8    | 6    | 157  | 415  |
| Gm11.VB.46  | Gm11 | 7850000  | 8310000  | 460000  | 50  | W | B | W | B | W | H | I | 32  | 1696 | 32   | 1682 | 23   | 1329 | 739  |
| Gm11.VB.47  | Gm11 | 8310000  | 8800000  | 490000  | 58  | W | B | W | B | W | W | I | 19  | 1657 | 20   | 1647 | 16   | 19   | 1039 |
| Gm11.VB.48  | Gm11 | 8800000  | 10510000 | 1710000 | 196 | W | W | W | W | W | W | I | 111 | 166  | 107  | 149  | 80   | 110  | 3098 |
| Gm11.VB.49  | Gm11 | 10510000 | 10600000 | 90000   | 10  | W | W | S | W | S | W | I | 7   | 6    | 104  | 8    | 96   | 5    | 209  |
| Gm11.VB.50  | Gm11 | 10600000 | 10780000 | 180000  | 18  | W | W | W | W | W | W | I | 7   | 8    | 20   | 8    | 19   | 7    | 290  |
| Gm11.VB.51  | Gm11 | 10780000 | 11010000 | 230000  | 23  | W | W | S | W | S | W | I | 6   | 11   | 828  | 8    | 758  | 10   | 737  |
| Gm11.VB.52  | Gm11 | 11010000 | 11030000 | 20000   | 2   | W | W | W | W | W | W | I | 1   | 4    | 10   | 3    | 6    | 2    | 79   |



|             |      |          |          |         |     |   |   |   |   |   |   |   |     |      |      |      |      |      |       |
|-------------|------|----------|----------|---------|-----|---|---|---|---|---|---|---|-----|------|------|------|------|------|-------|
| Gm11.VB.53  | Gm11 | 11030000 | 14970000 | 3940000 | 114 | W | W | W | W | W | W | I | 222 | 256  | 259  | 227  | 200  | 206  | 5272  |
| Gm11.VB.54  | Gm11 | 14970000 | 15790000 | 820000  | 54  | W | W | W | W | W | H | I | 40  | 47   | 47   | 48   | 37   | 578  | 2605  |
| Gm11.VB.55  | Gm11 | 15790000 | 15890000 | 100000  | 4   | W | W | W | W | W | W | I | 27  | 33   | 29   | 34   | 14   | 42   | 258   |
| Gm11.VB.56  | Gm11 | 15890000 | 16060000 | 170000  | 13  | W | W | W | W | W | W | I | 13  | 13   | 12   | 16   | 11   | 69   | 276   |
| Gm11.VB.57  | Gm11 | 16060000 | 16160000 | 100000  | 7   | W | B | W | B | W | H | I | 9   | 274  | 12   | 272  | 35   | 174  | 172   |
| Gm11.VB.58  | Gm11 | 16160000 | 16410000 | 250000  | 13  | W | W | W | W | W | H | I | 34  | 35   | 34   | 34   | 29   | 180  | 416   |
| Gm11.VB.59  | Gm11 | 16410000 | 17050000 | 640000  | 42  | W | W | W | W | W | W | I | 57  | 79   | 83   | 82   | 49   | 59   | 1905  |
| Gm11.VB.60  | Gm11 | 17050000 | 17110000 | 60000   | 2   | W | W | S | S | W | W | I | 0   | 1    | 45   | 45   | 1    | 0    | 30    |
| Gm11.VB.61  | Gm11 | 17110000 | 17230000 | 120000  | 7   | W | W | W | W | W | W | I | 14  | 23   | 21   | 20   | 18   | 18   | 219   |
| Gm11.VB.62  | Gm11 | 17230000 | 17390000 | 160000  | 10  | W | B | S | S | B | H | I | 3   | 236  | 208  | 205  | 207  | 74   | 314   |
| Gm11.VB.63  | Gm11 | 17390000 | 17460000 | 70000   | 8   | W | W | S | S | W | S | I | 3   | 4    | 137  | 139  | 6    | 131  | 140   |
| Gm11.VB.64  | Gm11 | 17460000 | 17480000 | 20000   | 2   | W | W | W | W | W | H | I | 0   | 1    | 1    | 1    | 1    | 98   | 21    |
| Gm11.VB.65  | Gm11 | 17480000 | 17670000 | 190000  | 15  | W | W | W | W | W | W | I | 5   | 13   | 12   | 11   | 11   | 11   | 703   |
| Gm11.VB.66  | Gm11 | 17670000 | 17990000 | 320000  | 14  | W | B | B | B | B | B | I | 24  | 468  | 470  | 467  | 473  | 478  | 867   |
| Gm11.VB.67  | Gm11 | 17990000 | 26660000 | 8670000 | 102 | W | W | W | W | W | W | I | 423 | 945  | 538  | 935  | 943  | 758  | 14069 |
| Gm11.VB.68  | Gm11 | 26660000 | 26760000 | 100000  | 4   | W | B | W | B | B | W | I | 22  | 77   | 19   | 71   | 73   | 23   | 169   |
| Gm11.VB.69  | Gm11 | 26760000 | 26820000 | 60000   | 3   | W | W | W | W | W | W | I | 0   | 5    | 0    | 5    | 5    | 6    | 287   |
| Gm11.VB.70  | Gm11 | 26820000 | 26850000 | 30000   | 0   | W | W | W | W | W | H | I | 4   | 6    | 4    | 6    | 5    | 31   | 35    |
| Gm11.VB.71  | Gm11 | 26850000 | 30020000 | 3170000 | 48  | W | W | W | W | W | W | I | 254 | 349  | 261  | 341  | 288  | 346  | 4206  |
| Gm11.VB.72  | Gm11 | 30020000 | 30720000 | 700000  | 27  | W | W | W | W | W | H | I | 53  | 76   | 82   | 79   | 67   | 1826 | 1755  |
| Gm11.VB.73  | Gm11 | 30720000 | 30860000 | 140000  | 5   | W | W | W | W | W | W | I | 10  | 15   | 14   | 15   | 15   | 18   | 493   |
| Gm11.VB.74  | Gm11 | 30860000 | 30930000 | 70000   | 3   | W | W | W | W | W | H | I | 0   | 4    | 6    | 4    | 4    | 211  | 204   |
| Gm11.VB.75  | Gm11 | 30930000 | 32920000 | 1990000 | 44  | W | W | W | W | W | W | I | 63  | 199  | 62   | 191  | 199  | 167  | 3587  |
| Gm11.VB.76  | Gm11 | 32920000 | 33030000 | 110000  | 7   | W | W | W | W | W | H | I | 6   | 13   | 6    | 13   | 8    | 367  | 282   |
| Gm11.VB.77  | Gm11 | 33030000 | 33090000 | 60000   | 3   | W | W | W | W | W | W | I | 0   | 3    | 0    | 3    | 3    | 2    | 216   |
| Gm11.VB.78  | Gm11 | 33090000 | 33250000 | 160000  | 15  | W | B | W | B | B | W | I | 5   | 189  | 5    | 191  | 177  | 12   | 146   |
| Gm11.VB.79  | Gm11 | 33250000 | 34820000 | 1570000 | 34  | W | W | W | W | W | W | I | 49  | 166  | 50   | 167  | 156  | 165  | 1395  |
| Gm11.VB.80  | Gm11 | 34820000 | 34870000 | 50000   | 2   | W | W | W | W | W | W | W | 0   | 17   | 1    | 17   | 16   | 3    | 12    |
| Gm11.VB.81  | Gm11 | 34870000 | 34940000 | 70000   | 5   | W | B | W | B | D | D | I | 1   | 142  | 1    | 140  | 111  | 109  | 58    |
| Gm11.VB.82  | Gm11 | 34940000 | 35090000 | 150000  | 10  | W | W | W | W | W | W | I | 8   | 16   | 7    | 13   | 13   | 15   | 307   |
| Gm11.VB.83  | Gm11 | 35090000 | 35140000 | 50000   | 5   | W | W | W | W | W | W | I | 11  | 19   | 11   | 14   | 10   | 13   | 179   |
| Gm11.VB.84  | Gm11 | 35140000 | 35150000 | 10000   | 0   | W | B | W | B | D | H | I | 0   | 73   | 0    | 67   | 43   | 54   | 9     |
| Gm11.VB.85  | Gm11 | 35150000 | 35320000 | 170000  | 14  | W | W | W | W | W | W | I | 13  | 20   | 12   | 16   | 18   | 16   | 859   |
| Gm11.VB.86  | Gm11 | 35320000 | 35410000 | 90000   | 6   | W | B | W | B | B | W | I | 23  | 691  | 21   | 673  | 627  | 26   | 418   |
| Gm11.VB.87  | Gm11 | 35410000 | 35430000 | 20000   | 1   | W | B | W | B | D | D | I | 4   | 48   | 4    | 48   | 36   | 37   | 34    |
| Gm11.VB.88  | Gm11 | 35430000 | 35620000 | 190000  | 10  | W | W | W | W | W | W | I | 19  | 26   | 18   | 28   | 28   | 24   | 529   |
| Gm11.VB.89  | Gm11 | 35620000 | 35730000 | 110000  | 9   | W | W | W | W | W | H | I | 9   | 17   | 11   | 16   | 14   | 431  | 210   |
| Gm11.VB.90  | Gm11 | 35730000 | 35970000 | 240000  | 14  | W | W | W | W | W | W | I | 5   | 21   | 9    | 19   | 18   | 25   | 563   |
| Gm11.VB.91  | Gm11 | 35970000 | 36100000 | 130000  | 10  | W | B | W | B | B | W | I | 6   | 250  | 6    | 245  | 233  | 29   | 354   |
| Gm11.VB.92  | Gm11 | 36100000 | 36130000 | 30000   | 2   | W | B | W | B | D | H | I | 5   | 57   | 5    | 58   | 35   | 41   | 33    |
| Gm11.VB.93  | Gm11 | 36130000 | 36240000 | 110000  | 9   | W | W | W | W | W | H | I | 0   | 9    | 0    | 9    | 8    | 180  | 307   |
| Gm11.VB.94  | Gm11 | 36240000 | 36630000 | 390000  | 34  | W | B | W | B | B | B | I | 10  | 1234 | 10   | 1222 | 1133 | 1150 | 892   |
| Gm11.VB.95  | Gm11 | 36630000 | 36730000 | 100000  | 9   | W | W | W | W | W | W | I | 20  | 18   | 15   | 19   | 12   | 13   | 197   |
| Gm11.VB.96  | Gm11 | 36730000 | 37330000 | 600000  | 54  | W | B | W | B | B | B | I | 56  | 2258 | 63   | 2197 | 1975 | 2086 | 1697  |
| Gm11.VB.97  | Gm11 | 37330000 | 37570000 | 240000  | 28  | W | W | W | W | W | W | I | 26  | 40   | 27   | 41   | 34   | 29   | 668   |
| Gm11.VB.98  | Gm11 | 37570000 | 37790000 | 220000  | 20  | W | B | W | W | B | H | I | 6   | 431  | 6    | 18   | 361  | 330  | 326   |
| Gm11.VB.99  | Gm11 | 37790000 | 38020000 | 230000  | 20  | W | B | W | B | D | D | I | 12  | 515  | 12   | 524  | 412  | 428  | 145   |
| Gm11.VB.100 | Gm11 | 38020000 | 38170000 | 150000  | 22  | W | B | W | B | D | W | I | 1   | 466  | 2    | 460  | 177  | 18   | 262   |
| Gm11.VB.101 | Gm11 | 38170000 | 38220000 | 50000   | 7   | W | B | W | B | D | H | I | 1   | 182  | 1    | 181  | 65   | 119  | 101   |
| Gm11.VB.102 | Gm11 | 38220000 | 38370000 | 150000  | 21  | W | B | W | B | W | H | I | 2   | 631  | 2    | 627  | 5    | 289  | 309   |
| Gm11.VB.103 | Gm11 | 38370000 | 38480000 | 110000  | 15  | W | W | W | G | W | H | I | 0   | 8    | 0    | 523  | 1    | 172  | 92    |
| Gm11.VB.104 | Gm11 | 38480000 | 38490000 | 10000   | 2   | W | B | W | G | W | H | I | 0   | 7    | 0    | 11   | 0    | 32   | 9     |
| Gm11.VB.105 | Gm11 | 38490000 | 38530000 | 40000   | 6   | W | B | W | G | B | H | I | 0   | 87   | 0    | 168  | 78   | 36   | 101   |
| Gm11.VB.106 | Gm11 | 38530000 | 38730000 | 200000  | 26  | W | W | W | G | W | H | I | 11  | 24   | 9    | 711  | 14   | 521  | 220   |
| Gm11.VB.107 | Gm11 | 38730000 | 38900000 | 170000  | 21  | W | B | W | G | B | H | I | 0   | 299  | 0    | 680  | 284  | 370  | 474   |
| Gm11.VB.108 | Gm11 | 38900000 | 39020000 | 120000  | 15  | W | B | W | W | B | H | I | 7   | 692  | 8    | 10   | 637  | 505  | 290   |
| Gm11.VB.109 | Gm11 | 39020000 | 39060000 | 40000   | 2   | W | B | W | G | B | W | I | 7   | 35   | 8    | 135  | 28   | 6    | 26    |
| Gm11.VB.110 | Gm11 | 39060000 | 39170000 | 110000  | 11  | W | B | W | W | B | B | I | 2   | 106  | 2    | 3    | 98   | 116  | 216   |
| Gm11.VB.111 | Gm11 | 39170000 | 39172790 | 2790    | 0   | W | W | W | W | W | W | W | 0   | 0    | 0    | 0    | 0    | 0    | 1     |
| Gm12.VB.1   | Gm12 | 0        | 700000   | 700000  | 84  | W | B | S | S | S | H | I | 39  | 1868 | 1934 | 1879 | 1754 | 1435 | 1522  |
| Gm12.VB.2   | Gm12 | 700000   | 910000   | 210000  | 25  | W | B | S | S | S | W | I | 17  | 882  | 950  | 927  | 846  | 21   | 726   |
| Gm12.VB.3   | Gm12 | 910000   | 920000   | 10000   | 3   | W | B | S | S | S | H | I | 0   | 63   | 7    | 7    | 7    | 24   | 51    |
| Gm12.VB.4   | Gm12 | 920000   | 1380000  | 460000  | 63  | W | B | W | W | W | H | I | 18  | 2069 | 29   | 30   | 28   | 1295 | 1051  |
| Gm12.VB.5   | Gm12 | 1380000  | 1660000  | 280000  | 28  | W | B | S | S | S | H | I | 23  | 1219 | 1232 | 1186 | 1095 | 910  | 637   |
| Gm12.VB.6   | Gm12 | 1660000  | 2330000  | 670000  | 77  | W | W | S | S | S | W | I | 3   | 26   | 2315 | 2292 | 2151 | 7    | 1107  |
| Gm12.VB.7   | Gm12 | 2330000  | 2380000  | 50000   | 4   | W | W | S | S | S | W | I | 3   | 9    | 211  | 205  | 184  | 4    | 104   |
| Gm12.VB.8   | Gm12 | 2380000  | 2410000  | 30000   | 2   | W | B | S | S | D | B | I | 0   | 72   | 99   | 97   | 73   | 70   | 39    |
| Gm12.VB.9   | Gm12 | 2410000  | 2530000  | 120000  | 14  | W | W | S | S | S | W | I | 1   | 2    | 438  | 433  | 396  | 2    | 221   |
| Gm12.VB.10  | Gm12 | 2530000  | 2720000  | 190000  | 35  | W | W | S | S | S | H | I | 1   | 11   | 588  | 586  | 541  | 250  | 462   |
| Gm12.VB.11  | Gm12 | 2720000  | 2950000  | 230000  | 27  | W | B | W | W | W | B | I | 18  | 1033 | 26   | 25   | 15   | 872  | 595   |
| Gm12.VB.12  | Gm12 | 2950000  | 3000000  | 50000   | 4   | W | B | S | S | S | B | I | 0   | 330  | 207  | 204  | 175  | 293  | 179   |
| Gm12.VB.13  | Gm12 | 3000000  | 3140000  | 140000  | 19  | W | W | S | S | S | W | I | 4   | 8    | 902  | 879  | 809  | 10   | 326   |
| Gm12.VB.14  | Gm12 | 3140000  | 3440000  | 300000  | 35  | W | B | S | S | S | B | I | 7   | 1236 | 875  | 988  | 784  | 1165 | 862   |
| Gm12.VB.15  | Gm12 | 3440000  | 3540000  | 100000  | 16  | W | W | W | W | W | W | I | 1   | 20   | 6    | 20   | 4    | 6    | 264   |
| Gm12.VB.16  | Gm12 | 3540000  | 3650000  | 110000  | 12  | W | W | S | W | S | H | I | 2   | 9    | 465  | 9    | 438  | 320  | 107   |
| Gm12.VB.17  | Gm12 | 3650000  | 3680000  | 30000   | 3   | W | B | S | B | S | B | I | 0   | 39   | 160  | 42   | 147  | 41   | 96    |
| Gm12.VB.18  | Gm12 | 3680000  | 3730000  | 50000   | 9   | W | W | S | W | D | W | I | 0   | 1    | 174  | 1    | 139  | 0    | 181   |
| Gm12.VB.19  | Gm12 | 3730000  | 3820000  | 90000   | 10  | W | W | W | W | W | W | I | 1   | 5    | 4    | 5    | 4    | 4    | 68    |

|            |      |          |          |         |     |   |   |   |   |   |   |   |      |      |      |      |      |      |      |
|------------|------|----------|----------|---------|-----|---|---|---|---|---|---|---|------|------|------|------|------|------|------|
| Gm12.VB.20 | Gm12 | 3820000  | 3850000  | 30000   | 3   | W | B | W | B | W | W | I | 5    | 80   | 6    | 79   | 4    | 2    | 61   |
| Gm12.VB.21 | Gm12 | 3850000  | 3950000  | 100000  | 9   | W | W | W | W | W | W | I | 0    | 11   | 2    | 11   | 1    | 2    | 228  |
| Gm12.VB.22 | Gm12 | 3950000  | 4140000  | 190000  | 17  | W | B | W | B | W | W | I | 15   | 506  | 17   | 486  | 10   | 12   | 369  |
| Gm12.VB.23 | Gm12 | 4140000  | 4270000  | 130000  | 18  | W | B | B | B | B | W | I | 25   | 202  | 192  | 200  | 179  | 27   | 301  |
| Gm12.VB.24 | Gm12 | 4270000  | 4310000  | 40000   | 7   | W | B | B | B | B | H | I | 1    | 227  | 244  | 236  | 220  | 93   | 81   |
| Gm12.VB.25 | Gm12 | 4310000  | 4530000  | 220000  | 19  | W | B | B | B | D | W | I | 5    | 741  | 773  | 733  | 623  | 24   | 334  |
| Gm12.VB.26 | Gm12 | 4530000  | 4610000  | 80000   | 9   | W | B | B | B | B | H | I | 14   | 199  | 203  | 196  | 170  | 247  | 183  |
| Gm12.VB.27 | Gm12 | 4610000  | 4900000  | 290000  | 32  | W | B | W | B | W | H | I | 9    | 789  | 18   | 771  | 18   | 798  | 656  |
| Gm12.VB.28 | Gm12 | 4900000  | 5080000  | 180000  | 21  | W | B | W | B | W | W | I | 3    | 662  | 9    | 645  | 9    | 8    | 471  |
| Gm12.VB.29 | Gm12 | 5080000  | 5160000  | 80000   | 11  | W | W | W | W | W | W | I | 3    | 9    | 8    | 8    | 10   | 7    | 119  |
| Gm12.VB.30 | Gm12 | 5160000  | 5220000  | 60000   | 4   | W | W | S | W | S | W | I | 1    | 2    | 353  | 1    | 315  | 3    | 145  |
| Gm12.VB.31 | Gm12 | 5220000  | 5440000  | 220000  | 20  | W | W | S | W | S | H | I | 27   | 33   | 1407 | 29   | 1278 | 1056 | 863  |
| Gm12.VB.32 | Gm12 | 5440000  | 5460000  | 20000   | 0   | W | W | S | W | D | W | I | 14   | 16   | 87   | 16   | 67   | 8    | 68   |
| Gm12.VB.33 | Gm12 | 5460000  | 5490000  | 30000   | 1   | W | B | S | B | S | W | I | 4    | 90   | 193  | 90   | 174  | 4    | 104  |
| Gm12.VB.34 | Gm12 | 5490000  | 5740000  | 250000  | 15  | W | W | S | W | S | W | I | 5    | 11   | 987  | 11   | 854  | 12   | 560  |
| Gm12.VB.35 | Gm12 | 5740000  | 6020000  | 280000  | 20  | W | W | W | W | W | W | I | 11   | 15   | 17   | 16   | 13   | 11   | 537  |
| Gm12.VB.36 | Gm12 | 6020000  | 6040000  | 20000   | 1   | W | B | B | B | B | B | I | 4    | 57   | 53   | 57   | 49   | 50   | 54   |
| Gm12.VB.37 | Gm12 | 6040000  | 6180000  | 140000  | 11  | W | B | W | B | W | B | I | 5    | 807  | 6    | 788  | 2    | 763  | 374  |
| Gm12.VB.38 | Gm12 | 6180000  | 6500000  | 320000  | 28  | W | B | S | B | S | B | I | 52   | 1359 | 2053 | 1334 | 1814 | 1237 | 1066 |
| Gm12.VB.39 | Gm12 | 6500000  | 6520000  | 20000   | 1   | W | W | S | W | S | W | I | 0    | 1    | 47   | 1    | 42   | 1    | 15   |
| Gm12.VB.40 | Gm12 | 6520000  | 6740000  | 220000  | 14  | W | W | W | W | W | W | I | 30   | 42   | 44   | 41   | 32   | 33   | 678  |
| Gm12.VB.41 | Gm12 | 6740000  | 6830000  | 90000   | 4   | W | W | W | W | W | W | I | 14   | 20   | 23   | 11   | 18   | 16   | 180  |
| Gm12.VB.42 | Gm12 | 6830000  | 6870000  | 40000   | 4   | W | W | S | W | S | W | I | 0    | 5    | 127  | 5    | 105  | 5    | 103  |
| Gm12.VB.43 | Gm12 | 6870000  | 7060000  | 190000  | 15  | W | B | S | B | S | B | I | 34   | 606  | 1027 | 591  | 957  | 559  | 638  |
| Gm12.VB.44 | Gm12 | 7060000  | 7160000  | 100000  | 10  | W | B | W | B | W | B | I | 10   | 505  | 15   | 499  | 16   | 498  | 251  |
| Gm12.VB.45 | Gm12 | 7160000  | 7280000  | 120000  | 7   | W | B | S | B | S | B | I | 6    | 539  | 735  | 540  | 636  | 494  | 396  |
| Gm12.VB.46 | Gm12 | 7280000  | 7420000  | 140000  | 14  | W | W | S | W | S | W | I | 3    | 7    | 944  | 8    | 850  | 12   | 512  |
| Gm12.VB.47 | Gm12 | 7420000  | 7580000  | 160000  | 14  | W | W | S | W | S | H | I | 10   | 19   | 904  | 18   | 842  | 352  | 604  |
| Gm12.VB.48 | Gm12 | 7580000  | 7600000  | 20000   | 3   | W | B | S | B | S | B | I | 15   | 96   | 152  | 89   | 129  | 92   | 86   |
| Gm12.VB.49 | Gm12 | 7600000  | 7710000  | 110000  | 8   | W | W | S | W | S | W | I | 7    | 18   | 872  | 19   | 795  | 6    | 472  |
| Gm12.VB.50 | Gm12 | 7710000  | 7770000  | 60000   | 3   | W | B | S | B | S | W | I | 1    | 131  | 304  | 126  | 295  | 3    | 283  |
| Gm12.VB.51 | Gm12 | 7770000  | 7880000  | 110000  | 3   | W | W | S | W | S | W | I | 15   | 23   | 482  | 22   | 421  | 24   | 246  |
| Gm12.VB.52 | Gm12 | 7880000  | 8070000  | 190000  | 10  | W | B | S | B | S | H | I | 38   | 722  | 731  | 700  | 668  | 664  | 364  |
| Gm12.VB.53 | Gm12 | 8070000  | 8080000  | 10000   | 0   | W | B | S | B | D | W | W | 0    | 5    | 119  | 5    | 111  | 4    | 2    |
| Gm12.VB.54 | Gm12 | 8080000  | 8390000  | 310000  | 16  | W | W | S | W | S | W | I | 42   | 66   | 2019 | 64   | 1854 | 57   | 928  |
| Gm12.VB.55 | Gm12 | 8390000  | 8460000  | 70000   | 4   | W | B | S | B | S | W | I | 0    | 455  | 445  | 448  | 400  | 2    | 199  |
| Gm12.VB.56 | Gm12 | 8460000  | 8500000  | 40000   | 2   | W | B | W | B | W | W | W | 0    | 190  | 1    | 189  | 1    | 0    | 10   |
| Gm12.VB.57 | Gm12 | 8500000  | 8870000  | 370000  | 20  | W | W | W | W | W | W | I | 8    | 27   | 32   | 28   | 29   | 30   | 1043 |
| Gm12.VB.58 | Gm12 | 8870000  | 8950000  | 80000   | 6   | W | B | B | B | B | W | I | 41   | 447  | 465  | 444  | 440  | 37   | 501  |
| Gm12.VB.59 | Gm12 | 8950000  | 9150000  | 200000  | 14  | W | B | B | B | B | B | I | 9    | 1022 | 1034 | 987  | 953  | 977  | 731  |
| Gm12.VB.60 | Gm12 | 9150000  | 9320000  | 170000  | 10  | W | W | W | W | W | W | I | 6    | 17   | 13   | 23   | 11   | 18   | 657  |
| Gm12.VB.61 | Gm12 | 9320000  | 9770000  | 450000  | 17  | W | B | W | B | W | W | I | 47   | 2129 | 48   | 2089 | 36   | 58   | 2136 |
| Gm12.VB.62 | Gm12 | 9770000  | 11470000 | 1700000 | 66  | W | B | W | B | W | B | I | 98   | 6731 | 100  | 6641 | 74   | 6522 | 5626 |
| Gm12.VB.63 | Gm12 | 11470000 | 12480000 | 1010000 | 29  | W | W | W | W | W | W | I | 68   | 132  | 56   | 124  | 63   | 131  | 3750 |
| Gm12.VB.64 | Gm12 | 12480000 | 12770000 | 290000  | 13  | W | B | W | B | W | B | I | 24   | 1154 | 23   | 1140 | 21   | 1092 | 1346 |
| Gm12.VB.65 | Gm12 | 12770000 | 13250000 | 480000  | 15  | W | W | W | W | W | W | I | 37   | 73   | 37   | 78   | 47   | 79   | 1649 |
| Gm12.VB.66 | Gm12 | 13250000 | 13970000 | 720000  | 51  | W | B | W | B | W | B | I | 27   | 834  | 25   | 835  | 25   | 819  | 2018 |
| Gm12.VB.67 | Gm12 | 13970000 | 14100000 | 130000  | 3   | W | W | W | W | W | W | I | 2    | 25   | 2    | 24   | 2    | 26   | 376  |
| Gm12.VB.68 | Gm12 | 14100000 | 14130000 | 30000   | 0   | W | W | W | W | W | W | I | 6    | 14   | 7    | 12   | 4    | 10   | 74   |
| Gm12.VB.69 | Gm12 | 14130000 | 14850000 | 720000  | 33  | W | W | W | W | W | W | I | 2077 | 2016 | 2022 | 2000 | 1981 | 2015 | 1992 |
| Gm12.VB.70 | Gm12 | 14850000 | 14860000 | 10000   | 1   | W | B | B | W | B | H | I | 9    | 4    | 4    | 8    | 4    | 6    | 27   |
| Gm12.VB.71 | Gm12 | 14860000 | 15050000 | 190000  | 5   | W | W | W | W | W | W | I | 29   | 27   | 31   | 28   | 29   | 26   | 752  |
| Gm12.VB.72 | Gm12 | 15050000 | 17300000 | 2250000 | 53  | W | W | W | W | W | W | I | 6035 | 5944 | 5967 | 5898 | 5832 | 5938 | 6491 |
| Gm12.VB.73 | Gm12 | 17300000 | 17360000 | 60000   | 0   | W | W | W | W | W | W | W | 3    | 6    | 4    | 3    | 3    | 6    | 19   |
| Gm12.VB.74 | Gm12 | 17360000 | 17420000 | 60000   | 1   | W | W | W | W | W | W | W | 11   | 10   | 10   | 11   | 11   | 11   | 16   |
| Gm12.VB.75 | Gm12 | 17420000 | 17470000 | 50000   | 0   | W | W | W | W | W | W | W | 13   | 12   | 11   | 12   | 10   | 12   | 12   |
| Gm12.VB.76 | Gm12 | 17470000 | 17950000 | 480000  | 11  | W | W | W | W | W | W | I | 1949 | 1936 | 1914 | 1893 | 1861 | 1866 | 1609 |
| Gm12.VB.77 | Gm12 | 17950000 | 18260000 | 310000  | 4   | W | B | B | B | B | W | I | 10   | 1148 | 1152 | 1101 | 1180 | 10   | 206  |
| Gm12.VB.78 | Gm12 | 18260000 | 21810000 | 3550000 | 27  | W | W | W | W | W | W | I | 352  | 304  | 325  | 331  | 343  | 376  | 1814 |
| Gm12.VB.79 | Gm12 | 21810000 | 21830000 | 20000   | 0   | W | W | S | G | W | W | I | 1    | 4    | 9    | 11   | 5    | 0    | 11   |
| Gm12.VB.80 | Gm12 | 21830000 | 21850000 | 20000   | 0   | W | W | W | W | W | W | W | 0    | 0    | 8    | 1    | 7    | 4    | 5    |
| Gm12.VB.81 | Gm12 | 21850000 | 21980000 | 130000  | 4   | W | W | W | W | W | W | I | 191  | 191  | 193  | 191  | 171  | 163  | 476  |
| Gm12.VB.82 | Gm12 | 21980000 | 22110000 | 130000  | 0   | W | W | W | W | W | W | I | 18   | 20   | 20   | 14   | 13   | 17   | 76   |
| Gm12.VB.83 | Gm12 | 22110000 | 22350000 | 240000  | 5   | W | W | W | W | W | W | I | 664  | 642  | 651  | 641  | 657  | 662  | 963  |
| Gm12.VB.84 | Gm12 | 22350000 | 22360000 | 10000   | 0   | W | W | W | W | W | W | I | 5    | 4    | 5    | 5    | 5    | 4    | 84   |
| Gm12.VB.85 | Gm12 | 22360000 | 22450000 | 90000   | 1   | W | W | W | W | W | W | I | 16   | 9    | 10   | 11   | 11   | 13   | 265  |
| Gm12.VB.86 | Gm12 | 22450000 | 24260000 | 1810000 | 21  | W | W | W | W | W | W | I | 252  | 240  | 238  | 230  | 228  | 239  | 1661 |
| Gm12.VB.87 | Gm12 | 24260000 | 24560000 | 300000  | 10  | W | W | W | W | W | W | I | 1271 | 1260 | 1285 | 1220 | 1120 | 1156 | 1160 |
| Gm12.VB.88 | Gm12 | 24560000 | 24570000 | 10000   | 0   | W | W | W | W | W | W | I | 7    | 7    | 7    | 7    | 3    | 7    | 15   |
| Gm12.VB.89 | Gm12 | 24570000 | 26090000 | 1520000 | 29  | W | W | W | W | W | W | I | 92   | 100  | 94   | 94   | 93   | 91   | 3985 |
| Gm12.VB.90 | Gm12 | 26090000 | 26420000 | 330000  | 0   | W | B | S | G | D | H | I | 287  | 269  | 282  | 263  | 265  | 243  | 407  |
| Gm12.VB.91 | Gm12 | 26420000 | 33070000 | 6650000 | 120 | W | W | W | W | W | W | I | 453  | 455  | 436  | 404  | 404  | 431  | 7587 |
| Gm12.VB.92 | Gm12 | 33070000 | 33200000 | 130000  | 7   | W | B | W | W | W | W | I | 22   | 458  | 28   | 18   | 26   | 26   | 390  |
| Gm12.VB.93 | Gm12 | 33200000 | 33650000 | 450000  | 19  | W | W | W | W | W | W | I | 10   | 26   | 12   | 10   | 10   | 19   | 1984 |
| Gm12.VB.94 | Gm12 | 33650000 | 33670000 | 20000   | 3   | W | B | W | W | W | B | I | 0    | 37   | 0    | 0    | 0    | 34   | 44   |
| Gm12.VB.95 | Gm12 | 33670000 | 33830000 | 160000  | 5   | W | B | W | W | W | W | I | 1    | 91   | 1    | 1    | 1    | 7    | 608  |
| Gm12.VB.96 | Gm12 | 33830000 | 33840000 | 10000   | 1   | W | B | W | W | W | B | I | 0    | 9    | 0    | 0    | 0    | 9    | 35   |
| Gm12.VB.97 | Gm12 | 33840000 | 33880000 | 40000   | 1   | W | W | W | W | W | H | I | 0    | 3    | 0    | 0    | 0    |      |      |

|             |      |          |          |         |     |   |   |   |   |   |   |   |     |       |      |       |      |       |       |
|-------------|------|----------|----------|---------|-----|---|---|---|---|---|---|---|-----|-------|------|-------|------|-------|-------|
| Gm12.VB.98  | Gm12 | 33880000 | 34090000 | 210000  | 15  | W | W | W | W | W | W | I | 12  | 29    | 12   | 12    | 13   | 31    | 681   |
| Gm12.VB.99  | Gm12 | 34090000 | 34220000 | 130000  | 12  | W | B | W | W | W | W | I | 11  | 193   | 13   | 13    | 10   | 17    | 593   |
| Gm12.VB.100 | Gm12 | 34220000 | 34280000 | 60000   | 5   | W | W | W | W | W | W | I | 1   | 9     | 1    | 1     | 1    | 5     | 49    |
| Gm12.VB.101 | Gm12 | 34280000 | 34370000 | 90000   | 6   | W | W | W | W | W | H | I | 5   | 12    | 5    | 6     | 3    | 68    | 272   |
| Gm12.VB.102 | Gm12 | 34370000 | 34480000 | 110000  | 10  | W | B | W | W | W | B | I | 1   | 762   | 1    | 1     | 1    | 761   | 388   |
| Gm12.VB.103 | Gm12 | 34480000 | 35280000 | 800000  | 68  | W | B | W | W | W | W | I | 86  | 2257  | 88   | 90    | 60   | 67    | 2492  |
| Gm12.VB.104 | Gm12 | 35280000 | 35330000 | 50000   | 6   | W | B | W | W | W | B | I | 0   | 105   | 0    | 0     | 0    | 103   | 157   |
| Gm12.VB.105 | Gm12 | 35330000 | 35490000 | 160000  | 13  | W | B | W | W | W | W | I | 3   | 451   | 2    | 3     | 1    | 9     | 170   |
| Gm12.VB.106 | Gm12 | 35490000 | 35710000 | 220000  | 19  | W | B | W | W | W | H | I | 16  | 623   | 21   | 20    | 14   | 410   | 510   |
| Gm12.VB.107 | Gm12 | 35710000 | 35760000 | 50000   | 6   | W | B | W | W | B | H | I | 1   | 71    | 1    | 1     | 64   | 45    | 41    |
| Gm12.VB.108 | Gm12 | 35760000 | 35980000 | 220000  | 21  | W | W | W | W | W | H | I | 28  | 29    | 29   | 28    | 29   | 163   | 623   |
| Gm12.VB.109 | Gm12 | 35980000 | 36280000 | 300000  | 36  | W | W | W | W | W | W | I | 29  | 31    | 25   | 27    | 24   | 34    | 817   |
| Gm12.VB.110 | Gm12 | 36280000 | 36350000 | 70000   | 7   | W | W | W | W | W | W | I | 7   | 8     | 7    | 6     | 1    | 14    | 220   |
| Gm12.VB.111 | Gm12 | 36350000 | 36440000 | 90000   | 9   | W | B | W | W | B | B | I | 15  | 377   | 15   | 14    | 357  | 356   | 217   |
| Gm12.VB.112 | Gm12 | 36440000 | 36950000 | 510000  | 55  | W | W | W | W | W | W | I | 24  | 42    | 28   | 27    | 30   | 40    | 1483  |
| Gm12.VB.113 | Gm12 | 36950000 | 37840000 | 890000  | 71  | W | B | W | W | B | W | I | 126 | 4490  | 135  | 98    | 4050 | 77    | 2522  |
| Gm12.VB.114 | Gm12 | 37840000 | 37950000 | 110000  | 11  | W | W | W | W | W | W | I | 6   | 9     | 4    | 6     | 4    | 4     | 390   |
| Gm12.VB.115 | Gm12 | 37950000 | 38210000 | 260000  | 22  | W | B | W | W | W | W | I | 14  | 1029  | 14   | 11    | 64   | 12    | 644   |
| Gm12.VB.116 | Gm12 | 38210000 | 38570000 | 360000  | 32  | W | W | W | W | W | W | I | 71  | 77    | 77   | 70    | 44   | 52    | 895   |
| Gm12.VB.117 | Gm12 | 38570000 | 38920000 | 350000  | 28  | W | B | W | W | W | W | I | 38  | 779   | 43   | 38    | 24   | 26    | 922   |
| Gm12.VB.118 | Gm12 | 38920000 | 40110000 | 1190000 | 111 | W | W | W | W | W | W | I | 65  | 96    | 71   | 60    | 50   | 57    | 3181  |
| Gm12.VB.119 | Gm12 | 40110000 | 40113140 | 3140    | 0   | W | W | W | W | W | W | I | 0   | 0     | 0    | 0     | 0    | 0     | 10    |
| Gm13.VB.1   | Gm13 | 0        | 230000   | 230000  | 23  | W | W | S | W | S | H | I | 14  | 16    | 448  | 14    | 405  | 112   | 491   |
| Gm13.VB.2   | Gm13 | 230000   | 400000   | 170000  | 15  | W | B | S | B | S | H | I | 36  | 522   | 520  | 511   | 451  | 348   | 315   |
| Gm13.VB.3   | Gm13 | 400000   | 560000   | 160000  | 13  | W | W | W | W | W | W | I | 10  | 18    | 22   | 19    | 17   | 15    | 289   |
| Gm13.VB.4   | Gm13 | 560000   | 680000   | 120000  | 9   | W | B | W | B | W | W | I | 4   | 192   | 15   | 184   | 14   | 11    | 112   |
| Gm13.VB.5   | Gm13 | 680000   | 720000   | 40000   | 3   | W | B | B | B | B | B | I | 0   | 221   | 225  | 221   | 191  | 189   | 140   |
| Gm13.VB.6   | Gm13 | 720000   | 800000   | 80000   | 8   | W | B | W | B | W | H | I | 11  | 193   | 11   | 198   | 12   | 225   | 213   |
| Gm13.VB.7   | Gm13 | 800000   | 3610000  | 2810000 | 151 | W | W | W | W | W | W | I | 201 | 235   | 203  | 233   | 147  | 167   | 8479  |
| Gm13.VB.8   | Gm13 | 3610000  | 3750000  | 140000  | 6   | W | W | W | W | W | H | I | 2   | 8     | 2    | 9     | 1    | 656   | 125   |
| Gm13.VB.9   | Gm13 | 3750000  | 4180000  | 430000  | 14  | W | W | W | W | W | W | I | 60  | 70    | 61   | 54    | 27   | 58    | 754   |
| Gm13.VB.10  | Gm13 | 4180000  | 4420000  | 240000  | 6   | W | W | W | W | W | H | I | 8   | 22    | 8    | 19    | 7    | 817   | 608   |
| Gm13.VB.11  | Gm13 | 4420000  | 4550000  | 130000  | 6   | W | W | W | W | W | W | I | 16  | 20    | 17   | 22    | 5    | 19    | 341   |
| Gm13.VB.12  | Gm13 | 4550000  | 4750000  | 200000  | 9   | W | W | W | W | W | H | I | 8   | 13    | 7    | 15    | 6    | 641   | 440   |
| Gm13.VB.13  | Gm13 | 4750000  | 4790000  | 40000   | 3   | W | B | W | B | W | H | I | 4   | 80    | 3    | 79    | 3    | 20    | 89    |
| Gm13.VB.14  | Gm13 | 4790000  | 5150000  | 360000  | 27  | W | B | W | W | W | H | I | 28  | 760   | 27   | 30    | 20   | 863   | 665   |
| Gm13.VB.15  | Gm13 | 5150000  | 5160000  | 10000   | 1   | W | B | W | W | W | W | I | 1   | 22    | 1    | 1     | 1    | 1     | 25    |
| Gm13.VB.16  | Gm13 | 5160000  | 5330000  | 170000  | 11  | W | W | W | W | W | W | I | 20  | 29    | 19   | 20    | 20   | 24    | 539   |
| Gm13.VB.17  | Gm13 | 5330000  | 5460000  | 130000  | 9   | W | B | W | W | W | W | I | 27  | 95    | 29   | 29    | 24   | 25    | 243   |
| Gm13.VB.18  | Gm13 | 5460000  | 5560000  | 100000  | 5   | W | W | W | W | W | W | I | 4   | 11    | 4    | 4     | 4    | 3     | 449   |
| Gm13.VB.19  | Gm13 | 5560000  | 5920000  | 360000  | 18  | W | B | W | W | W | W | I | 12  | 1480  | 16   | 15    | 11   | 14    | 1362  |
| Gm13.VB.20  | Gm13 | 5920000  | 6070000  | 150000  | 13  | W | W | W | W | W | W | I | 9   | 18    | 9    | 9     | 5    | 6     | 372   |
| Gm13.VB.21  | Gm13 | 6070000  | 7140000  | 1070000 | 74  | W | B | W | W | W | W | I | 90  | 4647  | 92   | 81    | 66   | 64    | 3646  |
| Gm13.VB.22  | Gm13 | 7140000  | 7450000  | 310000  | 23  | W | B | W | W | W | H | I | 48  | 1511  | 39   | 46    | 41   | 1924  | 775   |
| Gm13.VB.23  | Gm13 | 7450000  | 7660000  | 210000  | 7   | W | W | W | W | W | H | I | 7   | 22    | 14   | 6     | 7    | 757   | 620   |
| Gm13.VB.24  | Gm13 | 7660000  | 7980000  | 320000  | 23  | W | B | W | W | W | H | I | 15  | 1800  | 15   | 15    | 14   | 2112  | 1098  |
| Gm13.VB.25  | Gm13 | 7980000  | 8160000  | 180000  | 11  | W | B | W | W | D | H | I | 3   | 364   | 3    | 2     | 278  | 756   | 540   |
| Gm13.VB.26  | Gm13 | 8160000  | 10800000 | 2640000 | 67  | W | W | W | W | W | H | I | 131 | 265   | 135  | 259   | 228  | 10220 | 6303  |
| Gm13.VB.27  | Gm13 | 10800000 | 14780000 | 3980000 | 118 | W | B | W | B | W | H | I | 136 | 12745 | 117  | 12574 | 103  | 12492 | 10038 |
| Gm13.VB.28  | Gm13 | 14780000 | 15550000 | 770000  | 24  | W | W | W | W | W | W | W | 7   | 7     | 2    | 16    | 3    | 6     | 28    |
| Gm13.VB.29  | Gm13 | 15550000 | 16000000 | 450000  | 8   | W | B | W | G | W | H | I | 87  | 406   | 92   | 356   | 94   | 335   | 542   |
| Gm13.VB.30  | Gm13 | 16000000 | 16010000 | 10000   | 1   | W | W | W | G | W | H | I | 2   | 3     | 5    | 7     | 1    | 8     | 12    |
| Gm13.VB.31  | Gm13 | 16010000 | 16060000 | 50000   | 2   | W | W | W | W | W | W | I | 1   | 15    | 1    | 14    | 1    | 15    | 62    |
| Gm13.VB.32  | Gm13 | 16060000 | 16130000 | 70000   | 0   | W | W | W | W | W | W | I | 0   | 16    | 1    | 16    | 0    | 16    | 79    |
| Gm13.VB.33  | Gm13 | 16130000 | 16170000 | 40000   | 0   | W | W | W | G | W | W | I | 1   | 17    | 1    | 18    | 1    | 9     | 37    |
| Gm13.VB.34  | Gm13 | 16170000 | 16180000 | 10000   | 0   | W | W | W | W | W | W | I | 0   | 2     | 0    | 2     | 0    | 3     | 18    |
| Gm13.VB.35  | Gm13 | 16180000 | 16300000 | 120000  | 3   | W | W | W | W | W | W | I | 4   | 36    | 2    | 37    | 2    | 33    | 101   |
| Gm13.VB.36  | Gm13 | 16300000 | 20330000 | 4030000 | 29  | W | B | W | B | W | H | I | 303 | 5743  | 290  | 5628  | 294  | 5767  | 2354  |
| Gm13.VB.37  | Gm13 | 20330000 | 20600000 | 270000  | 23  | W | W | W | W | W | W | I | 9   | 17    | 13   | 18    | 10   | 14    | 414   |
| Gm13.VB.38  | Gm13 | 20600000 | 20610000 | 10000   | 0   | W | B | W | B | W | W | I | 0   | 25    | 2    | 26    | 0    | 0     | 10    |
| Gm13.VB.39  | Gm13 | 20610000 | 20710000 | 100000  | 12  | W | W | W | W | W | W | I | 5   | 8     | 8    | 7     | 6    | 5     | 200   |
| Gm13.VB.40  | Gm13 | 20710000 | 20720000 | 10000   | 2   | W | W | S | W | S | W | I | 0   | 0     | 10   | 0     | 8    | 0     | 20    |
| Gm13.VB.41  | Gm13 | 20720000 | 20770000 | 50000   | 7   | W | W | S | W | S | H | I | 0   | 2     | 174  | 2     | 164  | 82    | 93    |
| Gm13.VB.42  | Gm13 | 20770000 | 20780000 | 10000   | 1   | W | W | S | W | S | W | I | 0   | 1     | 5    | 1     | 5    | 3     | 11    |
| Gm13.VB.43  | Gm13 | 20780000 | 20840000 | 60000   | 9   | W | W | W | W | W | W | I | 0   | 2     | 0    | 2     | 0    | 0     | 102   |
| Gm13.VB.44  | Gm13 | 20840000 | 21000000 | 160000  | 16  | W | B | W | B | W | W | I | 26  | 414   | 39   | 406   | 36   | 30    | 271   |
| Gm13.VB.45  | Gm13 | 21000000 | 21150000 | 150000  | 15  | W | W | W | W | W | W | I | 23  | 21    | 39   | 20    | 33   | 29    | 263   |
| Gm13.VB.46  | Gm13 | 21150000 | 21230000 | 80000   | 3   | W | W | S | W | S | H | I | 3   | 4     | 250  | 3     | 237  | 146   | 183   |
| Gm13.VB.47  | Gm13 | 21230000 | 21500000 | 270000  | 30  | W | W | W | W | W | W | I | 3   | 3     | 9    | 3     | 9    | 15    | 384   |
| Gm13.VB.48  | Gm13 | 21500000 | 22780000 | 1280000 | 117 | W | W | W | W | W | H | I | 58  | 65    | 58   | 59    | 36   | 4021  | 2573  |
| Gm13.VB.49  | Gm13 | 22780000 | 22940000 | 160000  | 19  | W | W | W | W | W | W | I | 6   | 6     | 6    | 6     | 6    | 12    | 441   |
| Gm13.VB.50  | Gm13 | 22940000 | 23150000 | 210000  | 20  | W | W | W | W | W | H | I | 28  | 28    | 28   | 25    | 31   | 850   | 601   |
| Gm13.VB.51  | Gm13 | 23150000 | 23260000 | 110000  | 9   | W | W | W | W | W | W | I | 12  | 12    | 12   | 8     | 13   | 19    | 196   |
| Gm13.VB.52  | Gm13 | 23260000 | 23280000 | 20000   | 0   | W | W | W | W | W | H | I | 22  | 20    | 20   | 19    | 5    | 36    | 60    |
| Gm13.VB.53  | Gm13 | 23280000 | 23650000 | 370000  | 34  | W | W | S | S | S | H | I | 29  | 29    | 1294 | 1271  | 1221 | 724   | 1030  |
| Gm13.VB.54  | Gm13 | 23650000 | 23670000 | 20000   | 1   | W | W | S | S | S | W | I | 0   | 0     | 13   | 13    | 12   | 7     | 10    |
| Gm13.VB.55  | Gm13 | 23670000 | 24210000 | 540000  | 45  | W | W | W | W | W | W | I | 55  | 75    | 85   | 82    | 78   | 74    | 1493  |
| Gm13.VB.56  | Gm13 | 24210000 | 24410000 | 200000  | 15  | W | B | B | B | B | B | I | 13  | 374   | 383  | 368   | 327  | 342   | 295   |



|             |      |          |          |         |     |   |   |   |   |   |   |   |      |       |       |       |       |       |       |
|-------------|------|----------|----------|---------|-----|---|---|---|---|---|---|---|------|-------|-------|-------|-------|-------|-------|
| Gm13.VB.57  | Gm13 | 24410000 | 25160000 | 750000  | 51  | W | W | W | W | W | W | I | 63   | 108   | 121   | 107   | 112   | 109   | 2042  |
| Gm13.VB.58  | Gm13 | 25160000 | 25550000 | 390000  | 25  | W | B | B | B | B | B | I | 19   | 956   | 968   | 945   | 892   | 910   | 655   |
| Gm13.VB.59  | Gm13 | 25550000 | 26030000 | 480000  | 39  | W | B | W | W | W | B | I | 48   | 1382  | 56    | 53    | 45    | 1235  | 1050  |
| Gm13.VB.60  | Gm13 | 26030000 | 26140000 | 110000  | 6   | W | B | B | B | B | B | I | 0    | 458   | 442   | 440   | 429   | 432   | 159   |
| Gm13.VB.61  | Gm13 | 26140000 | 26260000 | 120000  | 10  | W | W | W | W | W | W | I | 1    | 6     | 9     | 9     | 9     | 6     | 204   |
| Gm13.VB.62  | Gm13 | 26260000 | 26270000 | 10000   | 0   | W | W | S | S | S | W | I | 7    | 11    | 43    | 39    | 34    | 7     | 10    |
| Gm13.VB.63  | Gm13 | 26270000 | 26380000 | 110000  | 4   | W | B | B | B | B | H | I | 11   | 413   | 401   | 399   | 362   | 286   | 206   |
| Gm13.VB.64  | Gm13 | 26380000 | 26520000 | 140000  | 14  | W | W | S | S | S | W | I | 20   | 28    | 506   | 501   | 471   | 22    | 350   |
| Gm13.VB.65  | Gm13 | 26520000 | 32030000 | 5510000 | 500 | W | B | S | S | S | H | I | 436  | 27326 | 26515 | 25418 | 23533 | 21398 | 15180 |
| Gm13.VB.66  | Gm13 | 32030000 | 32130000 | 100000  | 9   | W | W | S | S | S | S | I | 2    | 2     | 277   | 270   | 248   | 255   | 232   |
| Gm13.VB.67  | Gm13 | 32130000 | 32480000 | 350000  | 37  | W | B | S | S | S | S | I | 12   | 865   | 1047  | 1025  | 931   | 933   | 695   |
| Gm13.VB.68  | Gm13 | 32480000 | 32610000 | 130000  | 15  | W | W | S | S | S | H | I | 12   | 30    | 458   | 459   | 405   | 438   | 272   |
| Gm13.VB.69  | Gm13 | 32610000 | 32960000 | 350000  | 38  | W | B | S | S | S | H | I | 14   | 1190  | 903   | 859   | 825   | 454   | 403   |
| Gm13.VB.70  | Gm13 | 32960000 | 33470000 | 510000  | 62  | W | W | S | S | S | S | I | 12   | 37    | 2209  | 2139  | 1929  | 2057  | 1376  |
| Gm13.VB.71  | Gm13 | 33470000 | 33670000 | 200000  | 18  | W | B | S | S | S | H | I | 2    | 474   | 473   | 465   | 396   | 279   | 245   |
| Gm13.VB.72  | Gm13 | 33670000 | 33740000 | 70000   | 6   | W | W | S | S | S | H | I | 10   | 15    | 249   | 243   | 225   | 47    | 82    |
| Gm13.VB.73  | Gm13 | 33740000 | 33760000 | 20000   | 2   | W | W | S | S | S | W | I | 0    | 0     | 12    | 12    | 12    | 3     | 40    |
| Gm13.VB.74  | Gm13 | 33760000 | 34200000 | 440000  | 49  | W | W | W | W | W | W | I | 18   | 54    | 43    | 45    | 40    | 30    | 987   |
| Gm13.VB.75  | Gm13 | 34200000 | 34240000 | 40000   | 6   | W | B | W | W | W | W | I | 2    | 102   | 2     | 1     | 1     | 0     | 38    |
| Gm13.VB.76  | Gm13 | 34240000 | 34430000 | 190000  | 24  | W | W | W | W | W | W | I | 3    | 9     | 8     | 8     | 8     | 13    | 315   |
| Gm13.VB.77  | Gm13 | 34430000 | 34480000 | 50000   | 5   | W | B | B | B | B | B | I | 0    | 168   | 177   | 161   | 154   | 155   | 154   |
| Gm13.VB.78  | Gm13 | 34480000 | 34490000 | 10000   | 1   | W | B | B | B | D | W | W | 0    | 7     | 6     | 6     | 5     | 4     | 4     |
| Gm13.VB.79  | Gm13 | 34490000 | 34610000 | 120000  | 16  | W | W | W | W | W | W | I | 9    | 9     | 14    | 14    | 8     | 4     | 86    |
| Gm13.VB.80  | Gm13 | 34610000 | 35200000 | 590000  | 67  | W | B | B | B | B | B | I | 32   | 2126  | 2139  | 2098  | 1944  | 1919  | 1401  |
| Gm13.VB.81  | Gm13 | 35200000 | 35270000 | 70000   | 6   | W | B | W | W | B | B | I | 0    | 112   | 1     | 1     | 104   | 107   | 95    |
| Gm13.VB.82  | Gm13 | 35270000 | 35640000 | 370000  | 42  | W | W | W | W | W | W | I | 29   | 48    | 65    | 66    | 67    | 48    | 882   |
| Gm13.VB.83  | Gm13 | 35640000 | 35760000 | 120000  | 10  | W | B | W | W | W | W | I | 22   | 222   | 25    | 23    | 18    | 28    | 245   |
| Gm13.VB.84  | Gm13 | 35760000 | 35810000 | 50000   | 2   | W | B | W | W | W | H | I | 20   | 227   | 22    | 20    | 17    | 46    | 106   |
| Gm13.VB.85  | Gm13 | 35810000 | 36770000 | 960000  | 100 | W | B | S | S | S | H | I | 51   | 3797  | 3654  | 3529  | 3271  | 2037  | 1806  |
| Gm13.VB.86  | Gm13 | 36770000 | 36800000 | 30000   | 3   | W | W | S | S | S | W | I | 2    | 4     | 26    | 28    | 25    | 3     | 75    |
| Gm13.VB.87  | Gm13 | 36800000 | 36870000 | 70000   | 7   | W | W | W | W | W | W | I | 0    | 0     | 0     | 0     | 0     | 0     | 162   |
| Gm13.VB.88  | Gm13 | 36870000 | 36890000 | 20000   | 1   | W | B | W | W | W | B | I | 0    | 59    | 1     | 0     | 0     | 53    | 44    |
| Gm13.VB.89  | Gm13 | 36890000 | 37170000 | 280000  | 27  | W | W | W | W | W | W | I | 30   | 41    | 81    | 80    | 69    | 47    | 702   |
| Gm13.VB.90  | Gm13 | 37170000 | 37210000 | 40000   | 5   | W | B | B | B | B | W | I | 0    | 131   | 132   | 123   | 115   | 0     | 61    |
| Gm13.VB.91  | Gm13 | 37210000 | 37280000 | 70000   | 4   | W | B | W | W | W | W | I | 16   | 291   | 19    | 20    | 12    | 10    | 244   |
| Gm13.VB.92  | Gm13 | 37280000 | 37960000 | 680000  | 66  | W | W | W | W | W | W | I | 38   | 49    | 53    | 57    | 48    | 43    | 384   |
| Gm13.VB.93  | Gm13 | 37960000 | 38170000 | 210000  | 24  | W | B | B | B | B | W | I | 20   | 853   | 895   | 818   | 768   | 22    | 486   |
| Gm13.VB.94  | Gm13 | 38170000 | 38340000 | 170000  | 20  | W | W | W | W | W | W | W | 16   | 76    | 41    | 38    | 32    | 22    | 36    |
| Gm13.VB.95  | Gm13 | 38340000 | 38410000 | 70000   | 9   | W | B | W | W | W | W | B | 7    | 179   | 20    | 20    | 16    | 6     | 148   |
| Gm13.VB.96  | Gm13 | 38410000 | 38590000 | 180000  | 23  | W | B | S | S | S | W | I | 2    | 439   | 514   | 505   | 488   | 6     | 252   |
| Gm13.VB.97  | Gm13 | 38590000 | 38690000 | 100000  | 12  | W | W | S | S | S | W | I | 0    | 12    | 294   | 287   | 282   | 3     | 181   |
| Gm13.VB.98  | Gm13 | 38690000 | 38990000 | 300000  | 37  | W | B | S | S | S | W | I | 35   | 559   | 1095  | 1090  | 968   | 25    | 589   |
| Gm13.VB.99  | Gm13 | 38990000 | 39100000 | 110000  | 17  | W | B | S | S | D | H | I | 2    | 363   | 434   | 427   | 349   | 290   | 297   |
| Gm13.VB.100 | Gm13 | 39100000 | 39390000 | 290000  | 30  | W | W | W | W | W | W | I | 16   | 26    | 38    | 41    | 35    | 17    | 894   |
| Gm13.VB.101 | Gm13 | 39390000 | 39690000 | 300000  | 32  | W | B | W | W | W | W | I | 14   | 1593  | 51    | 51    | 44    | 12    | 961   |
| Gm13.VB.102 | Gm13 | 39690000 | 40110000 | 420000  | 46  | W | B | S | S | S | W | I | 39   | 1610  | 1035  | 861   | 876   | 50    | 708   |
| Gm13.VB.103 | Gm13 | 40110000 | 40440000 | 330000  | 28  | W | W | W | W | W | W | I | 10   | 13    | 13    | 13    | 9     | 17    | 461   |
| Gm13.VB.104 | Gm13 | 40440000 | 40760000 | 320000  | 27  | W | W | W | W | W | H | I | 10   | 11    | 12    | 13    | 8     | 816   | 412   |
| Gm13.VB.105 | Gm13 | 40760000 | 41280000 | 520000  | 54  | W | W | S | S | S | S | I | 46   | 48    | 846   | 813   | 700   | 697   | 627   |
| Gm13.VB.106 | Gm13 | 41280000 | 41320000 | 40000   | 3   | W | W | S | S | W | S | I | 13   | 17    | 59    | 53    | 5     | 40    | 26    |
| Gm13.VB.107 | Gm13 | 41320000 | 41390000 | 70000   | 9   | W | W | S | W | W | S | I | 9    | 6     | 46    | 6     | 5     | 48    | 246   |
| Gm13.VB.108 | Gm13 | 41390000 | 42530000 | 1140000 | 142 | W | W | W | W | W | W | I | 76   | 70    | 108   | 62    | 55    | 86    | 2804  |
| Gm13.VB.109 | Gm13 | 42530000 | 42940000 | 410000  | 45  | W | W | S | W | W | W | I | 16   | 18    | 1112  | 17    | 14    | 10    | 1116  |
| Gm13.VB.110 | Gm13 | 42940000 | 44400000 | 1460000 | 165 | W | W | W | W | W | W | I | 49   | 53    | 72    | 50    | 32    | 37    | 1550  |
| Gm13.VB.111 | Gm13 | 44400000 | 44408971 | 8971    | 1   | W | W | W | W | W | W | I | 0    | 0     | 0     | 0     | 0     | 0     | 4     |
| Gm14.VB.1   | Gm14 | 0        | 290000   | 290000  | 25  | W | B | S | S | S | W | I | 7    | 635   | 429   | 422   | 411   | 6     | 256   |
| Gm14.VB.2   | Gm14 | 290000   | 4910000  | 4620000 | 515 | W | B | S | S | B | H | I | 2822 | 15054 | 18792 | 18226 | 14418 | 14797 | 10044 |
| Gm14.VB.3   | Gm14 | 4910000  | 5060000  | 150000  | 16  | W | W | S | S | W | S | I | 4    | 4     | 600   | 575   | 4     | 565   | 313   |
| Gm14.VB.4   | Gm14 | 5060000  | 5920000  | 860000  | 81  | W | W | S | S | W | W | I | 53   | 79    | 3613  | 3542  | 64    | 65    | 2007  |
| Gm14.VB.5   | Gm14 | 5920000  | 6050000  | 130000  | 14  | W | W | S | S | W | H | I | 23   | 21    | 671   | 636   | 15    | 302   | 299   |
| Gm14.VB.6   | Gm14 | 6050000  | 6420000  | 370000  | 33  | W | W | S | S | W | W | I | 15   | 19    | 1993  | 1936  | 12    | 22    | 1229  |
| Gm14.VB.7   | Gm14 | 6420000  | 6610000  | 190000  | 14  | W | W | S | S | W | H | I | 16   | 20    | 960   | 920   | 12    | 283   | 497   |
| Gm14.VB.8   | Gm14 | 6610000  | 7060000  | 450000  | 36  | W | W | S | S | W | W | I | 34   | 33    | 1281  | 1260  | 36    | 34    | 1271  |
| Gm14.VB.9   | Gm14 | 7060000  | 7120000  | 60000   | 3   | W | B | B | B | B | H | I | 8    | 276   | 286   | 284   | 264   | 186   | 155   |
| Gm14.VB.10  | Gm14 | 7120000  | 7210000  | 90000   | 8   | W | W | S | S | D | W | I | 4    | 40    | 147   | 139   | 41    | 5     | 156   |
| Gm14.VB.11  | Gm14 | 7210000  | 7440000  | 230000  | 13  | W | W | S | S | W | W | I | 19   | 26    | 1132  | 1116  | 21    | 16    | 686   |
| Gm14.VB.12  | Gm14 | 7440000  | 7520000  | 80000   | 5   | W | W | S | S | W | H | I | 31   | 28    | 970   | 902   | 13    | 715   | 353   |
| Gm14.VB.13  | Gm14 | 7520000  | 7630000  | 110000  | 6   | W | W | W | W | W | W | I | 15   | 15    | 20    | 20    | 15    | 24    | 450   |
| Gm14.VB.14  | Gm14 | 7630000  | 7880000  | 250000  | 19  | W | W | W | W | W | H | I | 28   | 28    | 36    | 33    | 23    | 131   | 605   |
| Gm14.VB.15  | Gm14 | 7880000  | 8030000  | 150000  | 13  | W | W | S | S | W | H | I | 2    | 2     | 782   | 765   | 2     | 480   | 673   |
| Gm14.VB.16  | Gm14 | 8030000  | 8280000  | 250000  | 10  | W | W | W | W | W | H | I | 8    | 9     | 11    | 11    | 4     | 218   | 892   |
| Gm14.VB.17  | Gm14 | 8280000  | 8290000  | 10000   | 0   | W | W | S | S | W | H | I | 0    | 0     | 50    | 42    | 0     | 10    | 7     |
| Gm14.VB.18  | Gm14 | 8290000  | 8300000  | 10000   | 0   | W | W | S | S | W | W | I | 0    | 0     | 46    | 46    | 0     | 3     | 7     |
| Gm14.VB.19  | Gm14 | 8300000  | 8660000  | 360000  | 19  | W | W | W | W | W | W | I | 12   | 12    | 38    | 36    | 11    | 25    | 909   |
| Gm14.VB.20  | Gm14 | 8660000  | 9280000  | 620000  | 44  | W | W | S | S | W | W | I | 31   | 37    | 2081  | 2047  | 37    | 52    | 1657  |
| Gm14.VB.21  | Gm14 | 9280000  | 9290000  | 10000   | 0   | W | W | W | W | W | W | I | 7    | 7     | 7     | 7     | 7     | 10    | 14    |
| Gm14.VB.22  | Gm14 | 9290000  | 9620000  | 330000  | 13  | W | W | W | W | W | H | I | 24   | 22    | 27    | 19    | 14    | 236   | 1533  |
| Gm14.VB.23  | Gm14 | 9620000  | 9820000  | 200000  | 6   | W | W | W | W | W | W | I |      |       |       |       |       |       |       |



|            |      |          |          |          |     |   |   |   |   |   |   |     |     |       |       |       |       |       |       |
|------------|------|----------|----------|----------|-----|---|---|---|---|---|---|-----|-----|-------|-------|-------|-------|-------|-------|
| Gm15.VB.37 | Gm15 | 9000000  | 9050000  | 50000    | 6   | W | B | W | B | W | W | I   | 0   | 203   | 0     | 210   | 3     | 2     | 129   |
| Gm15.VB.38 | Gm15 | 9050000  | 9070000  | 20000    | 1   | W | B | S | B | S | W | I   | 0   | 17    | 14    | 17    | 13    | 1     | 44    |
| Gm15.VB.39 | Gm15 | 9070000  | 10070000 | 1000000  | 100 | W | B | B | B | B | H | I   | 59  | 4021  | 4121  | 3983  | 3680  | 3644  | 2618  |
| Gm15.VB.40 | Gm15 | 10070000 | 10150000 | 80000    | 8   | W | B | W | B | W | H | I   | 12  | 297   | 15    | 294   | 5     | 335   | 155   |
| Gm15.VB.41 | Gm15 | 10150000 | 10250000 | 100000   | 6   | W | W | W | W | W | W | I   | 5   | 11    | 9     | 9     | 6     | 9     | 301   |
| Gm15.VB.42 | Gm15 | 10250000 | 10340000 | 90000    | 9   | W | B | W | B | W | B | I   | 9   | 354   | 9     | 360   | 17    | 328   | 178   |
| Gm15.VB.43 | Gm15 | 10340000 | 10430000 | 90000    | 7   | W | B | B | B | D | D | I   | 45  | 542   | 554   | 554   | 482   | 497   | 74    |
| Gm15.VB.44 | Gm15 | 10430000 | 11240000 | 810000   | 68  | W | B | W | B | W | B | I   | 88  | 2570  | 97    | 2544  | 60    | 2328  | 1779  |
| Gm15.VB.45 | Gm15 | 11240000 | 11440000 | 200000   | 16  | W | B | S | B | W | B | I   | 18  | 498   | 584   | 500   | 58    | 453   | 702   |
| Gm15.VB.46 | Gm15 | 11440000 | 11530000 | 90000    | 7   | W | W | S | W | W | W | I   | 18  | 21    | 263   | 20    | 14    | 20    | 213   |
| Gm15.VB.47 | Gm15 | 11530000 | 11880000 | 350000   | 26  | W | W | W | W | W | W | I   | 23  | 38    | 22    | 40    | 16    | 36    | 1090  |
| Gm15.VB.48 | Gm15 | 11880000 | 11940000 | 60000    | 5   | W | W | S | W | W | W | I   | 9   | 11    | 231   | 10    | 9     | 11    | 232   |
| Gm15.VB.49 | Gm15 | 11940000 | 12040000 | 100000   | 12  | W | W | W | W | W | W | I   | 3   | 4     | 16    | 4     | 3     | 4     | 539   |
| Gm15.VB.50 | Gm15 | 12040000 | 12250000 | 210000   | 15  | W | B | B | B | D | B | I   | 8   | 799   | 783   | 791   | 608   | 757   | 714   |
| Gm15.VB.51 | Gm15 | 12250000 | 12820000 | 570000   | 40  | W | B | W | B | W | B | I   | 30  | 2074  | 28    | 2032  | 33    | 1971  | 1515  |
| Gm15.VB.52 | Gm15 | 12820000 | 15960000 | 3140000  | 164 | W | B | S | B | D | B | I   | 246 | 20635 | 19290 | 20326 | 15437 | 19539 | 13082 |
| Gm15.VB.53 | Gm15 | 15960000 | 16790000 | 830000   | 30  | W | W | W | W | W | W | I   | 42  | 92    | 88    | 92    | 92    | 85    | 2091  |
| Gm15.VB.54 | Gm15 | 16790000 | 17260000 | 470000   | 21  | W | B | W | B | W | B | I   | 40  | 4104  | 77    | 4036  | 60    | 3891  | 3257  |
| Gm15.VB.55 | Gm15 | 17260000 | 20430000 | 3170000  | 70  | W | W | W | W | W | W | I   | 136 | 260   | 256   | 266   | 229   | 217   | 10779 |
| Gm15.VB.56 | Gm15 | 20430000 | 20510000 | 80000    | 0   | W | W | S | W | S | W | I   | 1   | 4     | 134   | 4     | 126   | 0     | 939   |
| Gm15.VB.57 | Gm15 | 20510000 | 34640000 | 14130000 | 179 | W | B | B | B | B | W | I   | 622 | 46790 | 47252 | 46077 | 46745 | 567   | 16680 |
| Gm15.VB.58 | Gm15 | 34640000 | 34750000 | 110000   | 0   | W | W | W | W | W | W | W   | 50  | 11    | 14    | 15    | 21    | 39    | 38    |
| Gm15.VB.59 | Gm15 | 34750000 | 44110000 | 9360000  | 154 | W | B | B | B | B | W | I   | 526 | 42817 | 43253 | 42186 | 41725 | 536   | 17877 |
| Gm15.VB.60 | Gm15 | 44110000 | 45670000 | 1560000  | 35  | W | W | W | W | W | W | I   | 207 | 256   | 257   | 234   | 246   | 204   | 3901  |
| Gm15.VB.61 | Gm15 | 45670000 | 45680000 | 10000    | 1   | W | B | W | W | B | W | I   | 0   | 7     | 3     | 4     | 7     | 0     | 15    |
| Gm15.VB.62 | Gm15 | 45680000 | 46930000 | 1250000  | 38  | W | B | B | B | B | W | I   | 75  | 6765  | 7113  | 6690  | 6548  | 87    | 4097  |
| Gm15.VB.63 | Gm15 | 46930000 | 46990000 | 60000    | 0   | W | B | B | B | B | B | I   | 6   | 293   | 293   | 288   | 296   | 288   | 241   |
| Gm15.VB.64 | Gm15 | 46990000 | 47740000 | 750000   | 47  | W | W | W | W | W | W | I   | 53  | 69    | 72    | 71    | 58    | 63    | 3480  |
| Gm15.VB.65 | Gm15 | 47740000 | 47790000 | 50000    | 3   | W | B | W | B | W | W | I   | 1   | 225   | 6     | 214   | 5     | 5     | 132   |
| Gm15.VB.66 | Gm15 | 47790000 | 47810000 | 20000    | 1   | W | B | S | B | S | W | I   | 1   | 76    | 13    | 71    | 13    | 1     | 85    |
| Gm15.VB.67 | Gm15 | 47810000 | 47840000 | 30000    | 3   | W | W | W | W | W | W | I   | 0   | 2     | 2     | 2     | 2     | 3     | 118   |
| Gm15.VB.68 | Gm15 | 47840000 | 47960000 | 120000   | 9   | W | W | S | W | S | S | I   | 0   | 9     | 569   | 8     | 536   | 539   | 654   |
| Gm15.VB.69 | Gm15 | 47960000 | 48130000 | 170000   | 5   | W | B | S | B | S | H | I   | 5   | 731   | 1124  | 722   | 1067  | 859   | 481   |
| Gm15.VB.70 | Gm15 | 48130000 | 48230000 | 100000   | 5   | W | B | S | B | S | W | I   | 7   | 512   | 113   | 480   | 101   | 14    | 373   |
| Gm15.VB.71 | Gm15 | 48230000 | 48320000 | 90000    | 1   | W | B | B | B | B | B | I   | 3   | 332   | 324   | 325   | 295   | 305   | 230   |
| Gm15.VB.72 | Gm15 | 48320000 | 48580000 | 260000   | 18  | W | W | S | W | S | W | I   | 48  | 58    | 803   | 54    | 742   | 48    | 884   |
| Gm15.VB.73 | Gm15 | 48580000 | 48970000 | 390000   | 20  | W | B | S | B | S | B | I   | 1   | 2404  | 2222  | 2395  | 2074  | 2319  | 1619  |
| Gm15.VB.74 | Gm15 | 48970000 | 49290000 | 320000   | 15  | W | W | S | W | S | W | I   | 22  | 37    | 1867  | 37    | 1762  | 25    | 1134  |
| Gm15.VB.75 | Gm15 | 49290000 | 49470000 | 180000   | 6   | W | B | B | B | B | H | I   | 13  | 1419  | 1379  | 1393  | 1318  | 728   | 750   |
| Gm15.VB.76 | Gm15 | 49470000 | 49580000 | 110000   | 9   | W | B | B | B | B | W | I   | 0   | 465   | 500   | 468   | 462   | 5     | 333   |
| Gm15.VB.77 | Gm15 | 49580000 | 49630000 | 50000    | 4   | W | W | S | W | S | W | I   | 0   | 4     | 351   | 4     | 301   | 2     | 175   |
| Gm15.VB.78 | Gm15 | 49630000 | 49690000 | 60000    | 4   | W | W | W | W | W | W | I   | 2   | 3     | 6     | 1     | 5     | 4     | 390   |
| Gm15.VB.79 | Gm15 | 49690000 | 49760000 | 70000    | 6   | W | W | W | W | W | H | I   | 7   | 9     | 11    | 9     | 11    | 147   | 146   |
| Gm15.VB.80 | Gm15 | 49760000 | 49930000 | 170000   | 11  | W | W | S | W | S | H | I   | 13  | 14    | 1015  | 14    | 932   | 616   | 658   |
| Gm15.VB.81 | Gm15 | 49930000 | 50180000 | 250000   | 14  | W | W | W | W | W | H | I   | 7   | 8     | 7     | 9     | 21    | 921   | 895   |
| Gm15.VB.82 | Gm15 | 50180000 | 50430000 | 250000   | 17  | W | B | W | B | W | H | I   | 7   | 1905  | 8     | 1876  | 6     | 1582  | 1062  |
| Gm15.VB.83 | Gm15 | 50430000 | 50930000 | 500000   | 24  | W | B | W | B | W | W | I   | 51  | 2129  | 54    | 2126  | 46    | 53    | 2357  |
| Gm15.VB.84 | Gm15 | 50930000 | 50939160 | 9160     | 0   | W | B | W | B | W | W | I   | 11  | 91    | 10    | 85    | 9     | 11    | 78    |
| Gm16.VB.1  | Gm16 | 0        | 250000   | 250000   | 34  | W | B | W | B | B | W | I   | 11  | 304   | 8     | 296   | 286   | 8     | 404   |
| Gm16.VB.2  | Gm16 | 250000   | 350000   | 100000   | 5   | W | W | W | W | W | W | I   | 0   | 11    | 0     | 11    | 11    | 0     | 318   |
| Gm16.VB.3  | Gm16 | 350000   | 490000   | 140000   | 10  | W | B | W | B | B | W | I   | 13  | 535   | 13    | 539   | 515   | 8     | 383   |
| Gm16.VB.4  | Gm16 | 490000   | 630000   | 140000   | 12  | W | W | W | W | W | W | I   | 3   | 12    | 3     | 11    | 14    | 3     | 270   |
| Gm16.VB.5  | Gm16 | 630000   | 680000   | 50000    | 7   | W | B | W | B | B | W | I   | 3   | 129   | 3     | 121   | 115   | 3     | 87    |
| Gm16.VB.6  | Gm16 | 680000   | 810000   | 130000   | 9   | W | B | W | B | W | W | I   | 10  | 610   | 10    | 595   | 15    | 8     | 329   |
| Gm16.VB.7  | Gm16 | 810000   | 980000   | 170000   | 19  | W | W | W | W | W | W | I   | 27  | 46    | 29    | 49    | 32    | 47    | 240   |
| Gm16.VB.8  | Gm16 | 980000   | 990000   | 10000    | 2   | W | B | W | B | W | B | I   | 1   | 21    | 1     | 21    | 1     | 20    | 17    |
| Gm16.VB.9  | Gm16 | 990000   | 1100000  | 110000   | 11  | W | W | W | W | W | W | I   | 10  | 10    | 10    | 11    | 7     | 7     | 207   |
| Gm16.VB.10 | Gm16 | 1100000  | 1240000  | 140000   | 14  | W | B | W | B | W | W | I   | 4   | 192   | 4     | 180   | 4     | 16    | 349   |
| Gm16.VB.11 | Gm16 | 1240000  | 1320000  | 80000    | 7   | W | B | W | B | W | H | I   | 6   | 50    | 7     | 51    | 6     | 147   | 200   |
| Gm16.VB.12 | Gm16 | 1320000  | 1890000  | 570000   | 47  | W | B | W | B | B | H | I   | 13  | 2597  | 17    | 2564  | 2365  | 1829  | 1279  |
| Gm16.VB.13 | Gm16 | 1890000  | 1960000  | 70000    | 3   | W | B | W | B | B | W | I   | 11  | 307   | 11    | 297   | 300   | 14    | 237   |
| Gm16.VB.14 | Gm16 | 1960000  | 2240000  | 280000   | 24  | W | W | W | W | W | W | I   | 54  | 63    | 53    | 64    | 58    | 50    | 584   |
| Gm16.VB.15 | Gm16 | 2240000  | 2300000  | 60000    | 2   | W | B | W | B | B | W | I   | 5   | 106   | 6     | 106   | 96    | 5     | 90    |
| Gm16.VB.16 | Gm16 | 2300000  | 2660000  | 360000   | 33  | W | B | W | B | B | H | I   | 27  | 1106  | 25    | 1101  | 1005  | 714   | 933   |
| Gm16.VB.17 | Gm16 | 2660000  | 2760000  | 100000   | 13  | W | W | W | W | W | H | I   | 16  | 19    | 16    | 19    | 19    | 64    | 166   |
| Gm16.VB.18 | Gm16 | 2760000  | 3370000  | 610000   | 63  | W | B | W | B | B | H | I   | 25  | 2755  | 23    | 2701  | 2450  | 1242  | 1809  |
| Gm16.VB.19 | Gm16 | 3370000  | 3520000  | 150000   | 11  | W | B | W | B | D | W | I   | 6   | 196   | 4     | 194   | 583   | 5     | 358   |
| Gm16.VB.20 | Gm16 | 3520000  | 4060000  | 540000   | 53  | W | B | W | B | B | H | I   | 45  | 2091  | 41    | 2059  | 1888  | 1394  | 1177  |
| Gm16.VB.21 | Gm16 | 4060000  | 4250000  | 190000   | 15  | W | W | W | W | W | W | I   | 14  | 33    | 16    | 34    | 32    | 23    | 541   |
| Gm16.VB.22 | Gm16 | 4250000  | 4340000  | 90000    | 11  | W | B | W | B | B | H | I   | 15  | 294   | 14    | 290   | 280   | 336   | 274   |
| Gm16.VB.23 | Gm16 | 4340000  | 4750000  | 410000   | 27  | W | W | W | W | W | H | I   | 41  | 57    | 42    | 61    | 54    | 946   | 1142  |
| Gm16.VB.24 | Gm16 | 4750000  | 4920000  | 170000   | 17  | W | B | W | B | B | H | I   | 5   | 448   | 5     | 449   | 416   | 372   | 415   |
| Gm16.VB.25 | Gm16 | 4920000  | 5000000  | 80000    | 5   | W | B | W | B | W | W | I   | 9   | 148   | 9     | 143   | 12    | 37    | 129   |
| Gm16.VB.26 | Gm16 | 5000000  | 5310000  | 310000   | 20  | W | W | W | W | W | H | I   | 13  | 29    | 18    | 27    | 16    | 472   | 815   |
| Gm16.VB.27 | Gm16 | 5310000  | 5430000  | 120000   | 11  | W | B | W | B | W | H | I   | 12  | 694   | 13    | 685   | 13    | 412   | 379   |
| Gm16.VB.28 | Gm16 | 5430000  | 5600000  | 170000   | 15  | W | B | W | B | D | H | I   | 30  | 1032  | 28    | 1020  | 922   | 510   | 636   |
| Gm16.VB.29 | Gm16 | 5600000  | 5940000  | 340000   | 31  | W | B | W | B | W | H | I   | 60  | 2561  | 58    | 2517  | 58    | 1026  | 1061  |
| Gm16.VB.30 | Gm16 | 5940000  | 6020000  | 80000    | 8   | W | B | W | B | W | W | I</ |     |       |       |       |       |       |       |



|            |      |          |          |         |     |   |   |   |   |   |   |   |     |      |       |      |      |       |       |
|------------|------|----------|----------|---------|-----|---|---|---|---|---|---|---|-----|------|-------|------|------|-------|-------|
| Gm16.VB.31 | Gm16 | 6020000  | 6060000  | 40000   | 4   | W | W | W | W | D | W | I | 1   | 4    | 1     | 4    | 172  | 6     | 93    |
| Gm16.VB.32 | Gm16 | 6060000  | 6660000  | 600000  | 42  | W | B | W | B | D | H | I | 93  | 3116 | 108   | 3068 | 3258 | 2946  | 2370  |
| Gm16.VB.33 | Gm16 | 6660000  | 7240000  | 580000  | 38  | W | W | W | W | W | W | I | 67  | 69   | 79    | 66   | 53   | 74    | 2201  |
| Gm16.VB.34 | Gm16 | 7240000  | 9790000  | 2550000 | 85  | W | W | S | W | W | H | I | 140 | 135  | 13130 | 130  | 121  | 7433  | 8127  |
| Gm16.VB.35 | Gm16 | 9790000  | 9970000  | 180000  | 5   | W | W | S | W | W | W | I | 12  | 13   | 93    | 21   | 20   | 39    | 398   |
| Gm16.VB.36 | Gm16 | 9970000  | 14710000 | 4740000 | 49  | W | W | S | W | W | H | I | 243 | 252  | 10131 | 219  | 216  | 6029  | 6134  |
| Gm16.VB.37 | Gm16 | 14710000 | 14900000 | 190000  | 2   | W | W | S | W | W | W | I | 11  | 14   | 240   | 11   | 13   | 39    | 194   |
| Gm16.VB.38 | Gm16 | 14900000 | 16800000 | 1900000 | 19  | W | W | S | W | W | H | I | 95  | 93   | 5599  | 87   | 113  | 855   | 4435  |
| Gm16.VB.39 | Gm16 | 16800000 | 17370000 | 570000  | 6   | W | W | S | W | W | W | I | 60  | 58   | 1249  | 55   | 61   | 224   | 1047  |
| Gm16.VB.40 | Gm16 | 17370000 | 18630000 | 1260000 | 16  | W | W | W | W | W | W | I | 56  | 49   | 57    | 50   | 51   | 206   | 2987  |
| Gm16.VB.41 | Gm16 | 18630000 | 18680000 | 50000   | 1   | W | W | S | W | W | W | I | 0   | 1    | 25    | 1    | 1    | 7     | 162   |
| Gm16.VB.42 | Gm16 | 18680000 | 19530000 | 850000  | 26  | W | W | S | W | W | H | I | 42  | 45   | 4794  | 45   | 36   | 1112  | 3036  |
| Gm16.VB.43 | Gm16 | 19530000 | 21100000 | 1570000 | 19  | W | W | S | W | W | W | I | 75  | 64   | 1151  | 61   | 77   | 283   | 4194  |
| Gm16.VB.44 | Gm16 | 21100000 | 22060000 | 960000  | 27  | W | W | S | W | W | H | I | 66  | 72   | 2727  | 71   | 59   | 485   | 2184  |
| Gm16.VB.45 | Gm16 | 22060000 | 22640000 | 580000  | 2   | W | W | S | W | W | W | I | 28  | 27   | 1305  | 27   | 29   | 214   | 1099  |
| Gm16.VB.46 | Gm16 | 22640000 | 23690000 | 1050000 | 7   | W | W | W | W | W | W | I | 34  | 41   | 46    | 37   | 37   | 173   | 2093  |
| Gm16.VB.47 | Gm16 | 23690000 | 25290000 | 1600000 | 29  | W | W | W | W | W | H | I | 68  | 50   | 73    | 58   | 62   | 1345  | 6875  |
| Gm16.VB.48 | Gm16 | 25290000 | 25420000 | 130000  | 3   | W | W | W | W | W | W | I | 4   | 5    | 4     | 5    | 5    | 34    | 820   |
| Gm16.VB.49 | Gm16 | 25420000 | 28720000 | 3300000 | 138 | W | W | W | W | W | H | I | 177 | 199  | 179   | 184  | 201  | 13201 | 16193 |
| Gm16.VB.50 | Gm16 | 28720000 | 28970000 | 250000  | 15  | W | B | W | B | B | B | I | 30  | 1788 | 30    | 1725 | 1604 | 1652  | 1132  |
| Gm16.VB.51 | Gm16 | 28970000 | 29070000 | 100000  | 6   | W | B | W | B | D | W | I | 3   | 552  | 4     | 537  | 532  | 11    | 241   |
| Gm16.VB.52 | Gm16 | 29070000 | 29330000 | 260000  | 18  | W | B | W | B | B | H | I | 36  | 1944 | 39    | 1907 | 1787 | 1687  | 708   |
| Gm16.VB.53 | Gm16 | 29330000 | 29860000 | 530000  | 29  | W | W | W | W | W | W | I | 20  | 34   | 20    | 36   | 32   | 45    | 2729  |
| Gm16.VB.54 | Gm16 | 29860000 | 30160000 | 300000  | 18  | W | B | W | B | B | B | I | 15  | 1605 | 19    | 1564 | 1443 | 1474  | 842   |
| Gm16.VB.55 | Gm16 | 30160000 | 30270000 | 110000  | 7   | W | W | W | W | W | W | I | 10  | 15   | 10    | 15   | 14   | 13    | 495   |
| Gm16.VB.56 | Gm16 | 30270000 | 30330000 | 60000   | 5   | W | B | W | B | B | W | I | 0   | 399  | 0     | 377  | 369  | 4     | 211   |
| Gm16.VB.57 | Gm16 | 30330000 | 30340000 | 10000   | 2   | W | B | W | B | B | H | I | 0   | 13   | 0     | 15   | 14   | 21    | 24    |
| Gm16.VB.58 | Gm16 | 30340000 | 30900000 | 560000  | 47  | W | W | W | W | W | H | I | 67  | 65   | 60    | 62   | 51   | 2627  | 2232  |
| Gm16.VB.59 | Gm16 | 30900000 | 31080000 | 180000  | 17  | W | W | W | W | W | W | I | 16  | 15   | 15    | 15   | 10   | 14    | 764   |
| Gm16.VB.60 | Gm16 | 31080000 | 31620000 | 540000  | 51  | W | W | W | W | W | H | I | 25  | 22   | 22    | 21   | 22   | 2790  | 1709  |
| Gm16.VB.61 | Gm16 | 31620000 | 31830000 | 210000  | 21  | W | W | W | W | W | W | I | 14  | 18   | 14    | 13   | 14   | 19    | 650   |
| Gm16.VB.62 | Gm16 | 31830000 | 31910000 | 80000   | 6   | W | B | W | W | D | D | I | 24  | 416  | 28    | 22   | 287  | 284   | 158   |
| Gm16.VB.63 | Gm16 | 31910000 | 33400000 | 1490000 | 112 | W | W | W | W | W | H | I | 104 | 103  | 108   | 100  | 89   | 4410  | 3386  |
| Gm16.VB.64 | Gm16 | 33400000 | 33530000 | 130000  | 21  | W | W | W | W | W | W | I | 8   | 7    | 8     | 7    | 8    | 5     | 556   |
| Gm16.VB.65 | Gm16 | 33530000 | 33570000 | 40000   | 2   | W | W | W | W | W | H | I | 0   | 1    | 0     | 0    | 0    | 239   | 153   |
| Gm16.VB.66 | Gm16 | 33570000 | 35490000 | 1920000 | 156 | W | W | W | W | W | W | I | 66  | 76   | 78    | 69   | 80   | 85    | 3387  |
| Gm16.VB.67 | Gm16 | 35490000 | 35530000 | 40000   | 2   | W | B | W | B | W | W | I | 8   | 90   | 7     | 92   | 1    | 2     | 107   |
| Gm16.VB.68 | Gm16 | 35530000 | 35580000 | 50000   | 6   | W | B | W | B | B | W | I | 0   | 190  | 0     | 182  | 178  | 0     | 148   |
| Gm16.VB.69 | Gm16 | 35580000 | 35750000 | 170000  | 14  | W | W | W | W | W | W | I | 16  | 20   | 16    | 19   | 15   | 13    | 476   |
| Gm16.VB.70 | Gm16 | 35750000 | 36650000 | 900000  | 114 | W | B | W | B | B | W | I | 27  | 5017 | 26    | 4890 | 4544 | 19    | 2760  |
| Gm16.VB.71 | Gm16 | 36650000 | 37030000 | 380000  | 38  | W | B | W | B | B | H | I | 21  | 2104 | 22    | 2064 | 1916 | 1191  | 1057  |
| Gm16.VB.72 | Gm16 | 37030000 | 37390000 | 360000  | 39  | W | B | W | B | B | W | I | 21  | 1148 | 25    | 1102 | 1091 | 19    | 767   |
| Gm16.VB.73 | Gm16 | 37390000 | 37397385 | 7385    | 0   | W | B | W | W | W | W | I | 0   | 3    | 0     | 2    | 2    | 0     | 18    |
| Gm17.VB.1  | Gm17 | 0        | 340000   | 340000  | 24  | W | W | W | W | W | W | I | 14  | 19   | 10    | 12   | 8    | 11    | 633   |
| Gm17.VB.2  | Gm17 | 340000   | 800000   | 460000  | 56  | W | W | W | W | W | H | I | 14  | 21   | 12    | 10   | 8    | 1567  | 951   |
| Gm17.VB.3  | Gm17 | 800000   | 1320000  | 520000  | 65  | W | W | W | W | W | W | I | 12  | 30   | 12    | 13   | 12   | 24    | 1166  |
| Gm17.VB.4  | Gm17 | 1320000  | 1420000  | 100000  | 12  | W | W | W | W | W | H | I | 5   | 10   | 5     | 5    | 5    | 280   | 283   |
| Gm17.VB.5  | Gm17 | 1420000  | 1470000  | 50000   | 6   | W | B | W | W | W | H | I | 7   | 108  | 7     | 7    | 6    | 193   | 76    |
| Gm17.VB.6  | Gm17 | 1470000  | 1580000  | 110000  | 14  | W | W | W | W | W | H | I | 13  | 17   | 12    | 15   | 13   | 96    | 223   |
| Gm17.VB.7  | Gm17 | 1580000  | 1990000  | 410000  | 49  | W | W | W | W | W | W | I | 34  | 33   | 31    | 31   | 26   | 55    | 480   |
| Gm17.VB.8  | Gm17 | 1990000  | 2010000  | 20000   | 2   | W | W | W | W | W | H | I | 6   | 6    | 6     | 6    | 6    | 55    | 12    |
| Gm17.VB.9  | Gm17 | 2010000  | 2150000  | 140000  | 16  | W | W | W | W | W | W | I | 12  | 11   | 11    | 6    | 9    | 19    | 289   |
| Gm17.VB.10 | Gm17 | 2150000  | 2340000  | 190000  | 23  | W | W | W | W | W | H | I | 7   | 13   | 7     | 13   | 6    | 278   | 308   |
| Gm17.VB.11 | Gm17 | 2340000  | 2510000  | 170000  | 26  | W | B | W | B | W | B | I | 3   | 719  | 3     | 717  | 5    | 683   | 549   |
| Gm17.VB.12 | Gm17 | 2510000  | 3000000  | 490000  | 57  | W | W | W | W | W | W | I | 2   | 22   | 3     | 21   | 2    | 12    | 739   |
| Gm17.VB.13 | Gm17 | 3000000  | 3440000  | 440000  | 48  | W | B | W | W | W | B | I | 14  | 712  | 14    | 27   | 14   | 708   | 806   |
| Gm17.VB.14 | Gm17 | 3440000  | 3510000  | 70000   | 7   | W | B | W | B | W | B | I | 15  | 212  | 9     | 210  | 7    | 187   | 131   |
| Gm17.VB.15 | Gm17 | 3510000  | 3600000  | 90000   | 7   | W | W | W | W | W | W | I | 10  | 19   | 11    | 16   | 5    | 18    | 149   |
| Gm17.VB.16 | Gm17 | 3600000  | 3660000  | 60000   | 4   | W | W | S | S | S | W | I | 5   | 5    | 253   | 256  | 235  | 6     | 159   |
| Gm17.VB.17 | Gm17 | 3660000  | 3880000  | 220000  | 23  | W | W | W | W | W | W | I | 16  | 24   | 19    | 24   | 13   | 13    | 499   |
| Gm17.VB.18 | Gm17 | 3880000  | 4480000  | 600000  | 74  | W | B | W | B | W | W | I | 16  | 675  | 16    | 718  | 9    | 26    | 910   |
| Gm17.VB.19 | Gm17 | 4480000  | 4510000  | 30000   | 4   | W | W | W | W | W | W | I | 19  | 21   | 17    | 18   | 0    | 0     | 56    |
| Gm17.VB.20 | Gm17 | 4510000  | 4730000  | 220000  | 23  | W | W | W | W | W | W | I | 11  | 24   | 11    | 26   | 10   | 10    | 395   |
| Gm17.VB.21 | Gm17 | 4730000  | 4990000  | 260000  | 30  | W | B | W | B | W | W | I | 6   | 601  | 10    | 602  | 7    | 7     | 494   |
| Gm17.VB.22 | Gm17 | 4990000  | 5070000  | 80000   | 7   | W | B | W | W | W | W | I | 4   | 178  | 4     | 9    | 4    | 4     | 114   |
| Gm17.VB.23 | Gm17 | 5070000  | 5170000  | 100000  | 11  | W | W | W | W | W | W | I | 1   | 7    | 3     | 3    | 3    | 1     | 168   |
| Gm17.VB.24 | Gm17 | 5170000  | 5230000  | 60000   | 6   | W | W | S | S | S | W | I | 3   | 5    | 154   | 145  | 136  | 3     | 98    |
| Gm17.VB.25 | Gm17 | 5230000  | 5290000  | 60000   | 5   | W | W | W | W | W | W | I | 2   | 10   | 3     | 5    | 2    | 2     | 107   |
| Gm17.VB.26 | Gm17 | 5290000  | 5340000  | 50000   | 7   | W | B | W | W | W | W | I | 0   | 241  | 1     | 1    | 1    | 0     | 23    |
| Gm17.VB.27 | Gm17 | 5340000  | 5720000  | 380000  | 35  | W | W | W | W | W | W | I | 27  | 47   | 36    | 41   | 31   | 26    | 526   |
| Gm17.VB.28 | Gm17 | 5720000  | 5800000  | 80000   | 10  | W | W | W | W | W | H | I | 2   | 6    | 2     | 7    | 1    | 121   | 164   |
| Gm17.VB.29 | Gm17 | 5800000  | 6180000  | 380000  | 42  | W | B | W | G | W | W | I | 24  | 1388 | 24    | 863  | 26   | 23    | 845   |
| Gm17.VB.30 | Gm17 | 6180000  | 6220000  | 40000   | 7   | W | W | W | G | W | W | I | 0   | 2    | 0     | 115  | 0    | 1     | 53    |
| Gm17.VB.31 | Gm17 | 6220000  | 6600000  | 380000  | 44  | W | W | W | W | W | W | I | 8   | 18   | 6     | 30   | 8    | 7     | 725   |
| Gm17.VB.32 | Gm17 | 6600000  | 6890000  | 290000  | 36  | W | B | W | W | W | W | I | 8   | 888  | 8     | 51   | 7    | 8     | 522   |
| Gm17.VB.33 | Gm17 | 6890000  | 7280000  | 390000  | 38  | W | W | W | W | W | W | I | 13  | 24   | 12    | 32   | 13   | 29    | 719   |
| Gm17.VB.34 | Gm17 | 7280000  | 7400000  | 120000  | 14  | W | W | W | G | W | G | I | 2   | 4    | 2     | 116  | 1    | 110   | 299   |
| Gm17.VB.35 | Gm17 | 7400000  | 7560000  | 160000  | 17  | W | W | W | W | W | H | I | 2   | 4    | 2     | 6    | 1    | 2     |       |

|             |      |          |          |          |     |   |   |   |   |   |   |   |     |      |       |       |      |      |       |
|-------------|------|----------|----------|----------|-----|---|---|---|---|---|---|---|-----|------|-------|-------|------|------|-------|
| Gm17.VB.36  | Gm17 | 7560000  | 7750000  | 190000   | 20  | W | W | W | W | W | W | I | 2   | 2    | 2     | 2     | 2    | 2    | 317   |
| Gm17.VB.37  | Gm17 | 7750000  | 7790000  | 40000    | 2   | W | B | W | B | W | B | I | 0   | 78   | 0     | 78    | 0    | 78   | 48    |
| Gm17.VB.38  | Gm17 | 7790000  | 8330000  | 540000   | 60  | W | B | W | B | B | B | I | 23  | 883  | 26    | 863   | 771  | 879  | 1173  |
| Gm17.VB.39  | Gm17 | 8330000  | 8640000  | 310000   | 36  | W | B | B | B | B | B | I | 32  | 964  | 986   | 956   | 901  | 929  | 678   |
| Gm17.VB.40  | Gm17 | 8640000  | 8780000  | 140000   | 18  | W | B | W | B | B | W | I | 2   | 153  | 11    | 153   | 139  | 10   | 268   |
| Gm17.VB.41  | Gm17 | 8780000  | 9070000  | 290000   | 24  | W | B | W | B | B | H | I | 26  | 1197 | 40    | 1181  | 1066 | 882  | 542   |
| Gm17.VB.42  | Gm17 | 9070000  | 9290000  | 220000   | 21  | W | B | S | B | B | H | I | 9   | 628  | 618   | 615   | 592  | 203  | 410   |
| Gm17.VB.43  | Gm17 | 9290000  | 9490000  | 200000   | 27  | W | W | S | W | W | W | I | 4   | 11   | 384   | 7     | 10   | 7    | 456   |
| Gm17.VB.44  | Gm17 | 9490000  | 9640000  | 150000   | 15  | W | B | B | B | B | W | I | 5   | 408  | 423   | 419   | 399  | 14   | 229   |
| Gm17.VB.45  | Gm17 | 9640000  | 9690000  | 50000    | 5   | W | B | B | B | B | B | I | 1   | 63   | 62    | 64    | 60   | 58   | 66    |
| Gm17.VB.46  | Gm17 | 9690000  | 9750000  | 60000    | 2   | W | W | W | W | W | W | I | 2   | 7    | 7     | 7     | 7    | 4    | 65    |
| Gm17.VB.47  | Gm17 | 9750000  | 11030000 | 1280000  | 126 | W | W | W | W | W | W | I | 92  | 127  | 155   | 146   | 95   | 114  | 2614  |
| Gm17.VB.48  | Gm17 | 11030000 | 11170000 | 140000   | 15  | W | W | W | W | W | W | I | 3   | 3    | 59    | 58    | 3    | 7    | 451   |
| Gm17.VB.49  | Gm17 | 11170000 | 11270000 | 100000   | 8   | W | W | W | W | W | W | I | 1   | 1    | 10    | 10    | 1    | 5    | 183   |
| Gm17.VB.50  | Gm17 | 11270000 | 11290000 | 20000    | 1   | W | W | S | S | W | W | I | 0   | 0    | 155   | 151   | 0    | 2    | 22    |
| Gm17.VB.51  | Gm17 | 11290000 | 11400000 | 110000   | 12  | W | W | S | S | W | H | I | 13  | 11   | 602   | 579   | 12   | 461  | 343   |
| Gm17.VB.52  | Gm17 | 11400000 | 11610000 | 210000   | 13  | W | W | S | S | W | W | I | 2   | 2    | 432   | 435   | 2    | 8    | 454   |
| Gm17.VB.53  | Gm17 | 11610000 | 11650000 | 40000    | 3   | W | W | W | W | W | W | I | 7   | 7    | 10    | 10    | 6    | 9    | 76    |
| Gm17.VB.54  | Gm17 | 11650000 | 11750000 | 100000   | 12  | W | W | W | W | W | H | I | 19  | 22   | 24    | 24    | 19   | 318  | 218   |
| Gm17.VB.55  | Gm17 | 11750000 | 11900000 | 150000   | 16  | W | B | S | S | B | W | I | 5   | 904  | 782   | 755   | 822  | 2    | 540   |
| Gm17.VB.56  | Gm17 | 11900000 | 12100000 | 200000   | 15  | W | W | S | S | W | W | I | 7   | 21   | 1096  | 1040  | 18   | 7    | 572   |
| Gm17.VB.57  | Gm17 | 12100000 | 13390000 | 1290000  | 91  | W | B | B | B | B | W | I | 58  | 7552 | 7852  | 7621  | 6825 | 46   | 4822  |
| Gm17.VB.58  | Gm17 | 13390000 | 13490000 | 100000   | 3   | W | B | W | W | B | W | I | 8   | 193  | 20    | 18    | 180  | 4    | 218   |
| Gm17.VB.59  | Gm17 | 13490000 | 13500000 | 10000    | 1   | W | B | S | S | W | W | I | 1   | 6    | 36    | 35    | 3    | 1    | 17    |
| Gm17.VB.60  | Gm17 | 13500000 | 13650000 | 150000   | 8   | W | W | S | S | W | W | I | 6   | 13   | 381   | 354   | 13   | 6    | 545   |
| Gm17.VB.61  | Gm17 | 13650000 | 13670000 | 20000    | 2   | W | B | B | B | B | W | I | 0   | 80   | 80    | 80    | 80   | 0    | 104   |
| Gm17.VB.62  | Gm17 | 13670000 | 13950000 | 280000   | 15  | W | W | W | W | W | W | I | 30  | 44   | 50    | 43    | 43   | 28   | 701   |
| Gm17.VB.63  | Gm17 | 13950000 | 14400000 | 450000   | 29  | W | W | S | S | W | W | I | 25  | 39   | 2538  | 2437  | 26   | 19   | 1269  |
| Gm17.VB.64  | Gm17 | 14400000 | 15050000 | 650000   | 21  | W | B | S | S | B | W | I | 27  | 2959 | 3403  | 3313  | 2876 | 34   | 2362  |
| Gm17.VB.65  | Gm17 | 15050000 | 15460000 | 410000   | 17  | W | W | S | S | W | W | I | 61  | 66   | 2193  | 2171  | 46   | 36   | 1708  |
| Gm17.VB.66  | Gm17 | 15460000 | 15720000 | 260000   | 7   | W | B | S | S | B | W | I | 21  | 1165 | 1138  | 1075  | 1166 | 13   | 1394  |
| Gm17.VB.67  | Gm17 | 15720000 | 29860000 | 14140000 | 179 | W | W | S | S | W | W | I | 790 | 1555 | 43240 | 42159 | 1499 | 1380 | 20687 |
| Gm17.VB.68  | Gm17 | 29860000 | 29930000 | 70000    | 1   | W | W | W | W | W | W | W | 0   | 2    | 11    | 19    | 0    | 2    | 10    |
| Gm17.VB.69  | Gm17 | 29930000 | 30000000 | 70000    | 0   | W | W | W | W | W | W | I | 3   | 6    | 3     | 5     | 2    | 3    | 123   |
| Gm17.VB.70  | Gm17 | 30000000 | 30040000 | 40000    | 0   | W | W | W | W | W | W | W | 22  | 22   | 17    | 10    | 24   | 31   | 6     |
| Gm17.VB.71  | Gm17 | 30040000 | 31690000 | 1650000  | 24  | W | W | S | S | W | W | I | 68  | 183  | 5818  | 5703  | 162  | 161  | 4254  |
| Gm17.VB.72  | Gm17 | 31690000 | 31850000 | 160000   | 5   | W | W | S | S | W | W | I | 2   | 58   | 426   | 403   | 70   | 68   | 102   |
| Gm17.VB.73  | Gm17 | 31850000 | 33710000 | 1860000  | 51  | W | W | S | S | W | W | I | 76  | 159  | 7864  | 7719  | 137  | 138  | 3676  |
| Gm17.VB.74  | Gm17 | 33710000 | 33970000 | 260000   | 6   | W | B | S | S | B | B | I | 22  | 844  | 1371  | 1295  | 777  | 793  | 897   |
| Gm17.VB.75  | Gm17 | 33970000 | 34490000 | 520000   | 13  | W | W | S | S | W | W | I | 11  | 45   | 1767  | 1723  | 37   | 41   | 1681  |
| Gm17.VB.76  | Gm17 | 34490000 | 34960000 | 470000   | 13  | W | B | S | S | B | B | I | 25  | 1312 | 1638  | 1649  | 1252 | 1272 | 1468  |
| Gm17.VB.77  | Gm17 | 34960000 | 35120000 | 160000   | 4   | W | W | S | S | W | W | I | 0   | 23   | 925   | 926   | 20   | 23   | 403   |
| Gm17.VB.78  | Gm17 | 35120000 | 35320000 | 200000   | 11  | W | B | S | S | B | B | I | 9   | 548  | 1307  | 1287  | 521  | 521  | 747   |
| Gm17.VB.79  | Gm17 | 35320000 | 35470000 | 150000   | 4   | W | W | S | S | W | W | I | 4   | 38   | 178   | 176   | 33   | 39   | 914   |
| Gm17.VB.80  | Gm17 | 35470000 | 36850000 | 1380000  | 44  | W | B | S | S | B | B | I | 121 | 3310 | 5639  | 5412  | 3209 | 3301 | 4780  |
| Gm17.VB.81  | Gm17 | 36850000 | 37220000 | 370000   | 12  | W | B | W | W | B | B | I | 44  | 2768 | 83    | 69    | 2685 | 2695 | 1931  |
| Gm17.VB.82  | Gm17 | 37220000 | 37290000 | 70000    | 2   | W | W | W | W | W | W | I | 0   | 4    | 4     | 3     | 5    | 5    | 275   |
| Gm17.VB.83  | Gm17 | 37290000 | 37380000 | 90000    | 4   | W | W | S | S | W | W | I | 1   | 6    | 353   | 324   | 7    | 6    | 278   |
| Gm17.VB.84  | Gm17 | 37380000 | 37400000 | 20000    | 2   | W | B | S | S | B | B | I | 2   | 33   | 83    | 82    | 20   | 26   | 80    |
| Gm17.VB.85  | Gm17 | 37400000 | 37420000 | 20000    | 1   | W | W | S | S | W | W | I | 0   | 0    | 75    | 75    | 0    | 0    | 36    |
| Gm17.VB.86  | Gm17 | 37420000 | 37740000 | 320000   | 21  | W | W | W | W | W | W | I | 23  | 30   | 37    | 35    | 25   | 18   | 513   |
| Gm17.VB.87  | Gm17 | 37740000 | 37750000 | 10000    | 1   | W | W | W | W | W | H | I | 0   | 0    | 1     | 1     | 0    | 7    | 19    |
| Gm17.VB.88  | Gm17 | 37750000 | 37910000 | 160000   | 8   | W | W | S | S | W | H | I | 14  | 14   | 435   | 419   | 7    | 314  | 505   |
| Gm17.VB.89  | Gm17 | 37910000 | 38100000 | 190000   | 20  | W | W | W | W | W | W | I | 3   | 6    | 19    | 19    | 3    | 1    | 926   |
| Gm17.VB.90  | Gm17 | 38100000 | 38790000 | 690000   | 45  | W | W | S | S | W | W | I | 80  | 78   | 3195  | 3115  | 70   | 69   | 2301  |
| Gm17.VB.91  | Gm17 | 38790000 | 39030000 | 240000   | 21  | W | W | W | W | W | W | I | 21  | 21   | 30    | 29    | 14   | 11   | 813   |
| Gm17.VB.92  | Gm17 | 39030000 | 39070000 | 40000    | 2   | W | W | S | S | S | W | I | 0   | 1    | 173   | 174   | 155  | 0    | 131   |
| Gm17.VB.93  | Gm17 | 39070000 | 39080000 | 10000    | 1   | W | W | W | W | W | W | I | 1   | 2    | 4     | 4     | 4    | 1    | 23    |
| Gm17.VB.94  | Gm17 | 39080000 | 39400000 | 320000   | 29  | W | B | W | W | W | W | I | 32  | 793  | 46    | 42    | 40   | 28   | 688   |
| Gm17.VB.95  | Gm17 | 39400000 | 39500000 | 100000   | 9   | W | B | S | S | S | W | I | 48  | 549  | 415   | 400   | 356  | 42   | 340   |
| Gm17.VB.96  | Gm17 | 39500000 | 39720000 | 220000   | 17  | W | W | S | S | S | W | I | 27  | 27   | 1381  | 1322  | 1228 | 23   | 516   |
| Gm17.VB.97  | Gm17 | 39720000 | 39910000 | 190000   | 16  | W | W | W | W | W | W | I | 9   | 8    | 14    | 14    | 14   | 7    | 593   |
| Gm17.VB.98  | Gm17 | 39910000 | 40050000 | 140000   | 10  | W | W | S | S | S | W | I | 4   | 4    | 514   | 501   | 486  | 3    | 366   |
| Gm17.VB.99  | Gm17 | 40050000 | 40110000 | 60000    | 4   | W | W | S | S | W | W | I | 11  | 11   | 164   | 162   | 11   | 11   | 103   |
| Gm17.VB.100 | Gm17 | 40110000 | 40210000 | 100000   | 11  | W | W | W | W | W | W | I | 4   | 3    | 7     | 5     | 4    | 3    | 277   |
| Gm17.VB.101 | Gm17 | 40210000 | 40220000 | 10000    | 2   | W | W | S | S | W | W | I | 0   | 4    | 5     | 5     | 4    | 0    | 28    |
| Gm17.VB.102 | Gm17 | 40220000 | 40500000 | 280000   | 23  | W | B | B | B | B | W | I | 36  | 804  | 766   | 749   | 699  | 23   | 461   |
| Gm17.VB.103 | Gm17 | 40500000 | 40510000 | 10000    | 0   | W | B | W | W | B | W | I | 1   | 6    | 1     | 1     | 6    | 1    | 38    |
| Gm17.VB.104 | Gm17 | 40510000 | 40640000 | 130000   | 12  | W | W | W | W | W | W | I | 3   | 7    | 10    | 10    | 7    | 3    | 358   |
| Gm17.VB.105 | Gm17 | 40640000 | 40780000 | 140000   | 13  | W | B | W | W | B | W | I | 6   | 177  | 13    | 13    | 138  | 3    | 376   |
| Gm17.VB.106 | Gm17 | 40780000 | 41060000 | 280000   | 35  | W | B | B | B | B | W | I | 7   | 542  | 545   | 549   | 511  | 5    | 789   |
| Gm17.VB.107 | Gm17 | 41060000 | 41080000 | 20000    | 0   | W | B | B | B | B | B | I | 0   | 95   | 97    | 97    | 94   | 82   | 31    |
| Gm17.VB.108 | Gm17 | 41080000 | 41180000 | 100000   | 12  | W | B | B | B | B | W | I | 7   | 55   | 56    | 53    | 52   | 9    | 228   |
| Gm17.VB.109 | Gm17 | 41180000 | 41240000 | 60000    | 6   | W | B | B | B | B | B | I | 0   | 170  | 169   | 168   | 158  | 144  | 74    |
| Gm17.VB.110 | Gm17 | 41240000 | 41390000 | 150000   | 11  | W | B | B | B | B | W | I | 10  | 327  | 332   | 327   | 308  | 26   | 469   |
| Gm17.VB.111 | Gm17 | 41390000 | 41520000 | 130000   | 12  | W | B | B | B | B | H | I | 6   | 580  | 585   | 576   | 535  | 304  | 263   |
| Gm17.VB.112 | Gm17 | 41520000 | 41660000 | 140000   | 13  | W | B | B | B | B | W | I | 2   | 71   | 72    | 72    | 66   | 5    | 240   |
| Gm17.VB.113 | Gm17 | 41660000 | 41720000 | 60000    | 7   | W | B | B | B | B | B | I | 4   | 206  |       |       |      |      |       |

|             |      |          |          |         |     |   |   |   |   |   |   |   |     |       |      |       |       |       |       |
|-------------|------|----------|----------|---------|-----|---|---|---|---|---|---|---|-----|-------|------|-------|-------|-------|-------|
| Gm17.VB.114 | Gm17 | 41720000 | 41790000 | 70000   | 11  | W | W | W | W | W | H | I | 0   | 3     | 2    | 3     | 1     | 124   | 106   |
| Gm17.VB.115 | Gm17 | 41790000 | 41900000 | 110000  | 10  | W | W | W | W | W | W | I | 5   | 15    | 17   | 19    | 11    | 42    | 174   |
| Gm17.VB.116 | Gm17 | 41900000 | 41906774 | 6774    | 0   | W | W | W | W | W | W | I | 11  | 11    | 11   | 12    | 9     | 11    | 0     |
| Gm18.VB.1   | Gm18 | 0        | 150000   | 150000  | 16  | W | W | W | W | W | W | W | 0   | 6     | 0    | 6     | 2     | 9     | 17    |
| Gm18.VB.2   | Gm18 | 150000   | 270000   | 120000  | 16  | W | W | W | W | W | H | I | 5   | 15    | 5    | 14    | 6     | 203   | 209   |
| Gm18.VB.3   | Gm18 | 270000   | 480000   | 210000  | 28  | W | B | W | B | W | H | I | 12  | 431   | 12   | 422   | 9     | 178   | 416   |
| Gm18.VB.4   | Gm18 | 480000   | 510000   | 30000   | 4   | W | B | W | B | W | W | I | 3   | 54    | 2    | 53    | 2     | 2     | 77    |
| Gm18.VB.5   | Gm18 | 510000   | 590000   | 80000   | 12  | W | W | W | W | W | W | I | 1   | 1     | 1    | 1     | 1     | 4     | 358   |
| Gm18.VB.6   | Gm18 | 590000   | 660000   | 70000   | 8   | W | W | W | W | W | H | I | 3   | 5     | 3    | 5     | 3     | 130   | 126   |
| Gm18.VB.7   | Gm18 | 660000   | 920000   | 260000  | 36  | W | B | W | B | W | H | I | 5   | 695   | 5    | 694   | 5     | 689   | 576   |
| Gm18.VB.8   | Gm18 | 920000   | 1070000  | 150000  | 19  | W | B | W | B | W | W | I | 15  | 236   | 16   | 220   | 18    | 23    | 282   |
| Gm18.VB.9   | Gm18 | 1070000  | 2010000  | 940000  | 106 | W | B | W | B | W | H | I | 60  | 3283  | 62   | 3228  | 41    | 3144  | 1800  |
| Gm18.VB.10  | Gm18 | 2010000  | 2580000  | 570000  | 65  | W | B | W | B | B | H | I | 39  | 1729  | 42   | 1700  | 1558  | 1884  | 1353  |
| Gm18.VB.11  | Gm18 | 2580000  | 2700000  | 120000  | 13  | W | B | W | B | B | W | I | 20  | 403   | 15   | 393   | 361   | 28    | 179   |
| Gm18.VB.12  | Gm18 | 2700000  | 2920000  | 220000  | 23  | W | B | W | B | B | H | I | 10  | 396   | 11   | 382   | 356   | 435   | 505   |
| Gm18.VB.13  | Gm18 | 2920000  | 3030000  | 110000  | 4   | W | W | W | W | W | W | I | 6   | 16    | 6    | 13    | 13    | 8     | 258   |
| Gm18.VB.14  | Gm18 | 3030000  | 3280000  | 250000  | 21  | W | B | W | B | B | B | I | 4   | 947   | 3    | 940   | 891   | 903   | 794   |
| Gm18.VB.15  | Gm18 | 3280000  | 3390000  | 110000  | 8   | W | W | W | W | W | W | I | 14  | 25    | 16   | 24    | 21    | 17    | 371   |
| Gm18.VB.16  | Gm18 | 3390000  | 3490000  | 100000  | 7   | W | W | W | W | W | H | I | 30  | 27    | 31   | 31    | 26    | 412   | 81    |
| Gm18.VB.17  | Gm18 | 3490000  | 4320000  | 830000  | 74  | W | W | W | W | W | W | I | 56  | 68    | 60   | 62    | 62    | 58    | 2488  |
| Gm18.VB.18  | Gm18 | 4320000  | 4520000  | 200000  | 17  | W | B | W | B | B | W | I | 15  | 719   | 17   | 720   | 656   | 16    | 536   |
| Gm18.VB.19  | Gm18 | 4520000  | 4620000  | 100000  | 11  | W | W | W | W | W | W | I | 9   | 17    | 9    | 17    | 16    | 7     | 364   |
| Gm18.VB.20  | Gm18 | 4620000  | 5200000  | 580000  | 53  | W | B | W | B | B | W | I | 57  | 2227  | 53   | 2196  | 2035  | 57    | 1609  |
| Gm18.VB.21  | Gm18 | 5200000  | 5410000  | 210000  | 11  | W | W | W | W | W | W | I | 30  | 35    | 26   | 30    | 24    | 16    | 730   |
| Gm18.VB.22  | Gm18 | 5410000  | 5610000  | 200000  | 14  | W | B | W | B | B | W | I | 21  | 809   | 23   | 800   | 687   | 20    | 620   |
| Gm18.VB.23  | Gm18 | 5610000  | 5910000  | 300000  | 25  | W | W | W | W | W | W | I | 70  | 88    | 77   | 91    | 74    | 52    | 1450  |
| Gm18.VB.24  | Gm18 | 5910000  | 6030000  | 120000  | 7   | W | B | W | B | B | W | I | 6   | 444   | 6    | 447   | 375   | 5     | 121   |
| Gm18.VB.25  | Gm18 | 6030000  | 6400000  | 370000  | 21  | W | W | W | W | W | W | I | 45  | 57    | 37   | 44    | 54    | 42    | 726   |
| Gm18.VB.26  | Gm18 | 6400000  | 6670000  | 270000  | 15  | W | W | W | W | W | H | I | 8   | 12    | 8    | 13    | 12    | 765   | 581   |
| Gm18.VB.27  | Gm18 | 6670000  | 6950000  | 280000  | 16  | W | B | W | B | B | H | I | 19  | 1306  | 16   | 1304  | 1185  | 1532  | 1026  |
| Gm18.VB.28  | Gm18 | 6950000  | 7050000  | 100000  | 9   | W | B | W | B | B | W | I | 1   | 507   | 2    | 502   | 459   | 4     | 319   |
| Gm18.VB.29  | Gm18 | 7050000  | 7070000  | 20000   | 2   | W | B | W | G | D | H | I | 2   | 199   | 2    | 179   | 159   | 66    | 47    |
| Gm18.VB.30  | Gm18 | 7070000  | 9140000  | 2070000 | 116 | W | B | W | B | B | W | I | 143 | 10747 | 147  | 10595 | 10021 | 149   | 7640  |
| Gm18.VB.31  | Gm18 | 9140000  | 9210000  | 70000   | 3   | W | W | W | W | D | W | I | 11  | 29    | 11   | 8     | 499   | 8     | 306   |
| Gm18.VB.32  | Gm18 | 9210000  | 9240000  | 30000   | 3   | W | W | W | W | D | W | I | 0   | 6     | 0    | 0     | 181   | 0     | 274   |
| Gm18.VB.33  | Gm18 | 9240000  | 9670000  | 430000  | 21  | W | W | W | W | W | W | I | 21  | 36    | 19   | 20    | 25    | 17    | 1365  |
| Gm18.VB.34  | Gm18 | 9670000  | 10000000 | 330000  | 18  | W | B | W | W | W | W | I | 44  | 927   | 41   | 34    | 48    | 42    | 1384  |
| Gm18.VB.35  | Gm18 | 10000000 | 10030000 | 30000   | 2   | W | B | W | W | D | W | I | 0   | 33    | 0    | 0     | 38    | 0     | 107   |
| Gm18.VB.36  | Gm18 | 10030000 | 10230000 | 200000  | 9   | W | W | W | W | W | W | I | 9   | 24    | 8    | 8     | 18    | 8     | 453   |
| Gm18.VB.37  | Gm18 | 10230000 | 10770000 | 540000  | 20  | W | B | W | W | B | W | I | 7   | 476   | 19   | 7     | 482   | 12    | 1753  |
| Gm18.VB.38  | Gm18 | 10770000 | 10780000 | 10000   | 0   | W | W | W | W | D | W | I | 0   | 4     | 0    | 0     | 5     | 0     | 5     |
| Gm18.VB.39  | Gm18 | 10780000 | 11680000 | 900000  | 31  | W | W | W | W | W | W | I | 31  | 83    | 31   | 26    | 93    | 34    | 3570  |
| Gm18.VB.40  | Gm18 | 11680000 | 13870000 | 2190000 | 58  | W | B | W | W | B | W | I | 100 | 13054 | 102  | 76    | 12832 | 89    | 10583 |
| Gm18.VB.41  | Gm18 | 13870000 | 13990000 | 120000  | 0   | W | W | W | W | W | W | W | 52  | 69    | 57   | 49    | 49    | 64    | 73    |
| Gm18.VB.42  | Gm18 | 13990000 | 14150000 | 160000  | 0   | W | W | W | W | W | W | W | 39  | 53    | 47   | 46    | 35    | 40    | 88    |
| Gm18.VB.43  | Gm18 | 14150000 | 18430000 | 4280000 | 96  | W | B | W | W | B | W | I | 292 | 26368 | 313  | 267   | 25853 | 271   | 18887 |
| Gm18.VB.44  | Gm18 | 18430000 | 24710000 | 6280000 | 99  | W | B | W | W | B | H | I | 310 | 29511 | 308  | 275   | 29175 | 28338 | 19838 |
| Gm18.VB.45  | Gm18 | 24710000 | 24740000 | 30000   | 0   | W | W | W | W | W | W | W | 0   | 4     | 0    | 0     | 0     | 1     | 0     |
| Gm18.VB.46  | Gm18 | 24740000 | 25430000 | 690000  | 4   | W | B | B | B | B | W | W | 38  | 4542  | 4529 | 4425  | 4546  | 30    | 275   |
| Gm18.VB.47  | Gm18 | 25430000 | 25440000 | 10000   | 0   | W | B | W | W | W | W | I | 3   | 7     | 1    | 3     | 0     | 2     | 7     |
| Gm18.VB.48  | Gm18 | 25440000 | 25630000 | 190000  | 0   | W | W | W | W | W | W | W | 26  | 12    | 8    | 14    | 14    | 18    | 23    |
| Gm18.VB.49  | Gm18 | 25630000 | 25650000 | 20000   | 0   | W | W | W | W | W | W | W | 2   | 8     | 0    | 0     | 0     | 2     | 1     |
| Gm18.VB.50  | Gm18 | 25650000 | 25670000 | 20000   | 1   | W | B | W | W | W | W | I | 0   | 16    | 1    | 0     | 6     | 1     | 21    |
| Gm18.VB.51  | Gm18 | 25670000 | 27510000 | 1840000 | 24  | W | B | B | B | B | W | I | 156 | 2201  | 2199 | 2146  | 2184  | 152   | 1429  |
| Gm18.VB.52  | Gm18 | 27510000 | 27530000 | 20000   | 0   | W | W | W | W | D | W | W | 1   | 11    | 9    | 7     | 16    | 3     | 10    |
| Gm18.VB.53  | Gm18 | 27530000 | 27550000 | 20000   | 0   | W | W | W | W | W | W | W | 3   | 12    | 7    | 6     | 6     | 12    | 7     |
| Gm18.VB.54  | Gm18 | 27550000 | 31500000 | 3950000 | 29  | W | B | W | W | B | H | I | 180 | 9684  | 181  | 166   | 9811  | 10703 | 8258  |
| Gm18.VB.55  | Gm18 | 31500000 | 31670000 | 170000  | 1   | W | B | W | W | B | W | W | 0   | 417   | 0    | 0     | 413   | 7     | 21    |
| Gm18.VB.56  | Gm18 | 31670000 | 33490000 | 1820000 | 12  | W | B | W | W | B | H | I | 69  | 5150  | 60   | 56    | 5332  | 7221  | 5501  |
| Gm18.VB.57  | Gm18 | 33490000 | 33610000 | 120000  | 1   | W | W | W | W | W | W | W | 2   | 38    | 1    | 2     | 25    | 8     | 13    |
| Gm18.VB.58  | Gm18 | 33610000 | 36110000 | 2500000 | 21  | W | B | W | W | B | H | I | 132 | 6515  | 131  | 130   | 6508  | 6590  | 5650  |
| Gm18.VB.59  | Gm18 | 36110000 | 36220000 | 110000  | 0   | W | W | W | W | W | W | W | 5   | 13    | 3    | 3     | 11    | 8     | 2     |
| Gm18.VB.60  | Gm18 | 36220000 | 37430000 | 1210000 | 12  | W | B | W | W | B | H | I | 58  | 3459  | 48   | 51    | 3506  | 3592  | 2164  |
| Gm18.VB.61  | Gm18 | 37430000 | 37530000 | 100000  | 0   | W | W | W | W | W | W | W | 11  | 16    | 6    | 7     | 15    | 12    | 20    |
| Gm18.VB.62  | Gm18 | 37530000 | 39260000 | 1730000 | 25  | W | B | W | W | B | H | I | 82  | 5747  | 81   | 73    | 5757  | 6212  | 5480  |
| Gm18.VB.63  | Gm18 | 39260000 | 40160000 | 900000  | 31  | W | B | W | W | B | W | I | 28  | 3136  | 33   | 30    | 3043  | 91    | 1437  |
| Gm18.VB.64  | Gm18 | 40160000 | 40330000 | 170000  | 3   | W | W | W | W | W | W | I | 7   | 25    | 5    | 3     | 7     | 13    | 161   |
| Gm18.VB.65  | Gm18 | 40330000 | 40380000 | 50000   | 1   | W | B | W | W | W | W | I | 0   | 35    | 0    | 0     | 21    | 9     | 83    |
| Gm18.VB.66  | Gm18 | 40380000 | 40500000 | 120000  | 1   | W | W | W | W | W | W | I | 12  | 27    | 11   | 13    | 23    | 20    | 234   |
| Gm18.VB.67  | Gm18 | 40500000 | 41740000 | 1240000 | 22  | W | B | W | W | B | W | I | 84  | 2093  | 82   | 69    | 2139  | 145   | 1965  |
| Gm18.VB.68  | Gm18 | 41740000 | 42070000 | 330000  | 3   | W | B | W | W | B | H | I | 24  | 1354  | 26   | 21    | 1357  | 554   | 580   |
| Gm18.VB.69  | Gm18 | 42070000 | 42710000 | 640000  | 16  | W | B | W | W | B | W | I | 23  | 1763  | 23   | 25    | 1757  | 56    | 1326  |
| Gm18.VB.70  | Gm18 | 42710000 | 42820000 | 110000  | 1   | W | W | W | W | W | W | W | 3   | 14    | 1    | 1     | 17    | 2     | 10    |
| Gm18.VB.71  | Gm18 | 42820000 | 43760000 | 940000  | 17  | W | B | W | W | B | W | I | 33  | 3793  | 30   | 30    | 3802  | 83    | 2196  |
| Gm18.VB.72  | Gm18 | 43760000 | 44840000 | 1080000 | 6   | W | W | W | W | W | W | I | 43  | 100   | 39   | 36    | 98    | 75    | 2280  |
| Gm18.VB.73  | Gm18 | 44840000 | 45510000 | 670000  | 14  | W | B | W | W | B | W | I | 19  | 2764  | 22   | 20    | 2788  | 61    | 1901  |
| Gm18.VB.74  | Gm18 | 45510000 | 45930000 | 420000  | 11  | W | B | W | W | B | H | I | 38  | 2796  | 44   | 36    | 2715  | 773   | 1562  |
| Gm18.VB.75  | Gm18 | 45930000 | 46010000 | 80000   | 3   | W | W | W | W | W | H | I | 0   | 1     |      |       |       |       |       |



|             |      |          |          |          |     |   |   |   |   |   |   |   |     |       |       |       |       |       |       |
|-------------|------|----------|----------|----------|-----|---|---|---|---|---|---|---|-----|-------|-------|-------|-------|-------|-------|
| Gm18.VB.76  | Gm18 | 46010000 | 47420000 | 1410000  | 21  | W | W | W | W | W | W | I | 36  | 77    | 36    | 40    | 69    | 112   | 4512  |
| Gm18.VB.77  | Gm18 | 47420000 | 48530000 | 1110000  | 29  | W | W | W | W | W | H | I | 64  | 117   | 70    | 56    | 89    | 5075  | 4028  |
| Gm18.VB.78  | Gm18 | 48530000 | 49390000 | 860000   | 36  | W | B | W | W | B | B | I | 42  | 5084  | 34    | 41    | 5002  | 4894  | 3839  |
| Gm18.VB.79  | Gm18 | 49390000 | 50890000 | 1500000  | 39  | W | W | W | W | W | W | I | 106 | 178   | 98    | 83    | 172   | 168   | 5968  |
| Gm18.VB.80  | Gm18 | 50890000 | 52170000 | 1280000  | 48  | W | B | W | W | B | W | I | 58  | 10102 | 58    | 55    | 9714  | 49    | 9613  |
| Gm18.VB.81  | Gm18 | 52170000 | 52310000 | 140000   | 7   | W | W | W | W | W | W | I | 3   | 15    | 3     | 5     | 13    | 3     | 343   |
| Gm18.VB.82  | Gm18 | 52310000 | 52600000 | 290000   | 11  | W | B | W | W | B | W | I | 39  | 714   | 37    | 37    | 675   | 32    | 1014  |
| Gm18.VB.83  | Gm18 | 52600000 | 53540000 | 940000   | 48  | W | B | W | W | B | H | I | 62  | 8276  | 68    | 68    | 7759  | 7425  | 5209  |
| Gm18.VB.84  | Gm18 | 53540000 | 53820000 | 280000   | 20  | W | B | W | W | B | W | I | 10  | 1833  | 11    | 11    | 1730  | 12    | 1661  |
| Gm18.VB.85  | Gm18 | 53820000 | 54630000 | 810000   | 59  | W | W | W | W | W | W | I | 29  | 36    | 30    | 29    | 33    | 30    | 3912  |
| Gm18.VB.86  | Gm18 | 54630000 | 55040000 | 410000   | 33  | W | W | W | W | W | H | I | 4   | 5     | 3     | 3     | 5     | 2331  | 1439  |
| Gm18.VB.87  | Gm18 | 55040000 | 55160000 | 120000   | 9   | W | W | W | W | W | W | I | 7   | 12    | 7     | 4     | 3     | 5     | 390   |
| Gm18.VB.88  | Gm18 | 55160000 | 58290000 | 3130000  | 273 | W | B | W | W | B | H | I | 306 | 18708 | 305   | 294   | 17242 | 16429 | 10100 |
| Gm18.VB.89  | Gm18 | 58290000 | 58860000 | 570000   | 47  | W | B | B | W | B | B | I | 48  | 3513  | 3605  | 49    | 3236  | 3212  | 2119  |
| Gm18.VB.90  | Gm18 | 58860000 | 58870000 | 10000    | 1   | W | W | S | W | W | S | I | 0   | 4     | 5     | 0     | 4     | 5     | 19    |
| Gm18.VB.91  | Gm18 | 58870000 | 59050000 | 180000   | 18  | W | W | W | W | W | W | I | 2   | 2     | 3     | 2     | 3     | 5     | 575   |
| Gm18.VB.92  | Gm18 | 59050000 | 59290000 | 240000   | 30  | W | W | W | W | W | H | I | 0   | 0     | 0     | 0     | 0     | 444   | 420   |
| Gm18.VB.93  | Gm18 | 59290000 | 59870000 | 580000   | 63  | W | B | B | B | B | H | I | 43  | 3373  | 3412  | 3336  | 3021  | 2166  | 1884  |
| Gm18.VB.94  | Gm18 | 59870000 | 60080000 | 210000   | 24  | W | B | B | B | B | W | I | 24  | 639   | 642   | 621   | 568   | 9     | 432   |
| Gm18.VB.95  | Gm18 | 60080000 | 60310000 | 230000   | 29  | W | B | B | B | B | H | I | 6   | 1248  | 1273  | 1248  | 1155  | 862   | 654   |
| Gm18.VB.96  | Gm18 | 60310000 | 60620000 | 310000   | 33  | W | W | W | W | W | W | I | 11  | 17    | 19    | 18    | 10    | 10    | 946   |
| Gm18.VB.97  | Gm18 | 60620000 | 60690000 | 70000    | 5   | W | W | W | W | W | H | I | 5   | 3     | 5     | 3     | 3     | 53    | 139   |
| Gm18.VB.98  | Gm18 | 60690000 | 60920000 | 230000   | 29  | W | W | W | W | W | W | I | 5   | 5     | 4     | 5     | 2     | 12    | 835   |
| Gm18.VB.99  | Gm18 | 60920000 | 62300000 | 1380000  | 144 | W | W | W | W | W | H | I | 42  | 45    | 48    | 45    | 36    | 1028  | 3111  |
| Gm18.VB.100 | Gm18 | 62300000 | 62308140 | 8140     | 0   | W | B | W | G | B | H | I | 9   | 2     | 8     | 5     | 2     | 17    | 21    |
| Gm19.VB.1   | Gm19 | 0        | 170000   | 170000   | 13  | W | W | S | W | W | H | I | 21  | 21    | 705   | 21    | 8     | 748   | 514   |
| Gm19.VB.2   | Gm19 | 170000   | 280000   | 110000   | 9   | W | W | W | W | W | W | I | 9   | 14    | 22    | 12    | 12    | 17    | 261   |
| Gm19.VB.3   | Gm19 | 280000   | 690000   | 410000   | 43  | W | W | S | W | W | H | I | 60  | 85    | 1558  | 82    | 59    | 699   | 1121  |
| Gm19.VB.4   | Gm19 | 690000   | 900000   | 210000   | 21  | W | W | S | W | S | H | I | 20  | 20    | 1209  | 21    | 1079  | 395   | 649   |
| Gm19.VB.5   | Gm19 | 900000   | 1000000  | 100000   | 8   | W | W | S | W | S | W | I | 0   | 0     | 524   | 0     | 457   | 2     | 126   |
| Gm19.VB.6   | Gm19 | 1000000  | 1110000  | 110000   | 9   | W | W | W | W | W | W | I | 16  | 14    | 19    | 14    | 4     | 7     | 440   |
| Gm19.VB.7   | Gm19 | 1110000  | 1160000  | 50000    | 4   | W | W | S | W | S | W | I | 0   | 4     | 170   | 4     | 161   | 4     | 108   |
| Gm19.VB.8   | Gm19 | 1160000  | 1230000  | 70000    | 7   | W | W | S | W | S | H | I | 17  | 19    | 492   | 19    | 443   | 371   | 251   |
| Gm19.VB.9   | Gm19 | 1230000  | 1430000  | 200000   | 16  | W | W | W | W | W | H | I | 29  | 39    | 37    | 44    | 25    | 647   | 653   |
| Gm19.VB.10  | Gm19 | 1430000  | 1530000  | 100000   | 5   | W | W | W | W | W | W | I | 12  | 12    | 9     | 10    | 5     | 11    | 261   |
| Gm19.VB.11  | Gm19 | 1530000  | 1540000  | 10000    | 0   | W | W | W | W | W | H | I | 0   | 0     | 0     | 0     | 0     | 30    | 27    |
| Gm19.VB.12  | Gm19 | 1540000  | 1750000  | 210000   | 10  | W | W | W | W | W | W | I | 24  | 27    | 33    | 26    | 17    | 21    | 503   |
| Gm19.VB.13  | Gm19 | 1750000  | 1780000  | 30000    | 1   | W | W | S | W | S | W | I | 2   | 2     | 64    | 2     | 62    | 2     | 102   |
| Gm19.VB.14  | Gm19 | 1780000  | 1790000  | 10000    | 1   | W | W | W | W | W | W | I | 0   | 0     | 0     | 0     | 0     | 0     | 35    |
| Gm19.VB.15  | Gm19 | 1790000  | 1820000  | 30000    | 4   | W | B | W | B | W | W | I | 0   | 65    | 1     | 64    | 1     | 3     | 53    |
| Gm19.VB.16  | Gm19 | 1820000  | 1930000  | 110000   | 5   | W | W | W | W | W | W | I | 0   | 13    | 7     | 13    | 5     | 10    | 303   |
| Gm19.VB.17  | Gm19 | 1930000  | 2170000  | 240000   | 15  | W | B | W | B | W | B | I | 30  | 1052  | 42    | 1032  | 25    | 1006  | 592   |
| Gm19.VB.18  | Gm19 | 2170000  | 2210000  | 40000    | 4   | W | W | S | W | W | W | I | 2   | 1     | 77    | 1     | 4     | 2     | 126   |
| Gm19.VB.19  | Gm19 | 2210000  | 2450000  | 240000   | 12  | W | B | S | B | D | B | I | 43  | 613   | 1118  | 584   | 276   | 580   | 585   |
| Gm19.VB.20  | Gm19 | 2450000  | 2650000  | 200000   | 7   | W | B | S | B | S | W | I | 38  | 521   | 377   | 516   | 339   | 34    | 737   |
| Gm19.VB.21  | Gm19 | 2650000  | 2850000  | 200000   | 8   | W | W | W | W | W | W | I | 8   | 29    | 31    | 25    | 21    | 7     | 1137  |
| Gm19.VB.22  | Gm19 | 2850000  | 3300000  | 450000   | 19  | W | B | B | B | B | W | I | 16  | 1729  | 1743  | 1692  | 1725  | 17    | 1655  |
| Gm19.VB.23  | Gm19 | 3300000  | 3440000  | 140000   | 8   | W | W | W | W | W | W | I | 27  | 35    | 36    | 36    | 33    | 30    | 718   |
| Gm19.VB.24  | Gm19 | 3440000  | 3490000  | 50000    | 5   | W | B | B | B | B | W | I | 0   | 205   | 204   | 200   | 195   | 0     | 274   |
| Gm19.VB.25  | Gm19 | 3490000  | 6790000  | 3300000  | 127 | W | W | W | W | W | W | I | 202 | 272   | 315   | 261   | 288   | 271   | 11243 |
| Gm19.VB.26  | Gm19 | 6790000  | 7530000  | 740000   | 19  | W | B | B | B | B | W | I | 32  | 2170  | 2204  | 2139  | 2154  | 51    | 2294  |
| Gm19.VB.27  | Gm19 | 7530000  | 7580000  | 50000    | 1   | W | W | W | W | W | W | I | 1   | 19    | 18    | 17    | 15    | 1     | 97    |
| Gm19.VB.28  | Gm19 | 7580000  | 7690000  | 110000   | 1   | W | W | W | W | W | W | W | 5   | 18    | 17    | 24    | 20    | 3     | 43    |
| Gm19.VB.29  | Gm19 | 7690000  | 7730000  | 40000    | 1   | W | W | W | W | W | W | I | 0   | 5     | 6     | 9     | 9     | 1     | 42    |
| Gm19.VB.30  | Gm19 | 7730000  | 8550000  | 820000   | 34  | W | B | S | B | S | W | I | 89  | 2649  | 4127  | 2595  | 3910  | 97    | 3233  |
| Gm19.VB.31  | Gm19 | 8550000  | 8900000  | 350000   | 13  | W | B | S | B | S | B | I | 13  | 1339  | 1585  | 1330  | 1507  | 1270  | 1000  |
| Gm19.VB.32  | Gm19 | 8900000  | 14520000 | 5620000  | 59  | W | W | S | W | S | H | I | 333 | 388   | 20396 | 358   | 20484 | 19973 | 15444 |
| Gm19.VB.33  | Gm19 | 14520000 | 14530000 | 10000    | 0   | W | W | W | W | D | W | I | 0   | 1     | 2     | 1     | 8     | 0     | 43    |
| Gm19.VB.34  | Gm19 | 14530000 | 14820000 | 290000   | 1   | W | W | W | W | W | W | I | 11  | 15    | 26    | 14    | 23    | 17    | 623   |
| Gm19.VB.35  | Gm19 | 14820000 | 14910000 | 90000    | 0   | W | W | W | W | W | W | I | 1   | 2     | 7     | 2     | 3     | 10    | 176   |
| Gm19.VB.36  | Gm19 | 14910000 | 27440000 | 12530000 | 89  | W | W | S | W | S | S | I | 521 | 707   | 35329 | 683   | 35679 | 36072 | 27538 |
| Gm19.VB.37  | Gm19 | 27440000 | 27450000 | 10000    | 0   | W | B | S | B | D | D | I | 11  | 16    | 84    | 17    | 56    | 60    | 17    |
| Gm19.VB.38  | Gm19 | 27450000 | 29880000 | 2430000  | 47  | W | B | W | B | W | W | I | 118 | 14668 | 180   | 14518 | 176   | 244   | 8506  |
| Gm19.VB.39  | Gm19 | 29880000 | 33080000 | 3200000  | 74  | W | B | B | B | B | W | I | 146 | 16433 | 16333 | 16283 | 15919 | 319   | 10119 |
| Gm19.VB.40  | Gm19 | 33080000 | 33840000 | 760000   | 14  | W | W | S | W | S | W | I | 62  | 109   | 3337  | 106   | 3221  | 82    | 2349  |
| Gm19.VB.41  | Gm19 | 33840000 | 33860000 | 20000    | 1   | W | B | S | B | S | W | I | 2   | 139   | 85    | 136   | 85    | 2     | 67    |
| Gm19.VB.42  | Gm19 | 33860000 | 34290000 | 430000   | 14  | W | B | W | B | W | W | I | 23  | 1887  | 31    | 1861  | 32    | 40    | 1184  |
| Gm19.VB.43  | Gm19 | 34290000 | 34570000 | 280000   | 12  | W | W | W | W | W | W | I | 21  | 32    | 17    | 37    | 18    | 35    | 1163  |
| Gm19.VB.44  | Gm19 | 34570000 | 34610000 | 40000    | 2   | W | B | W | B | W | W | I | 2   | 119   | 2     | 120   | 2     | 3     | 115   |
| Gm19.VB.45  | Gm19 | 34610000 | 34800000 | 190000   | 8   | W | W | W | W | W | W | I | 6   | 17    | 7     | 17    | 5     | 6     | 533   |
| Gm19.VB.46  | Gm19 | 34800000 | 35560000 | 760000   | 35  | W | B | W | B | W | W | I | 43  | 3134  | 42    | 3147  | 38    | 61    | 2317  |
| Gm19.VB.47  | Gm19 | 35560000 | 36090000 | 530000   | 22  | W | B | W | B | W | H | I | 41  | 2397  | 39    | 2379  | 27    | 2767  | 2340  |
| Gm19.VB.48  | Gm19 | 36090000 | 36220000 | 130000   | 3   | W | W | W | W | W | H | I | 1   | 13    | 1     | 13    | 1     | 570   | 396   |
| Gm19.VB.49  | Gm19 | 36220000 | 36280000 | 60000    | 5   | W | B | W | B | W | H | I | 0   | 606   | 0     | 600   | 0     | 275   | 139   |
| Gm19.VB.50  | Gm19 | 36280000 | 36390000 | 110000   | 5   | W | W | W | W | W | H | I | 10  | 21    | 11    | 19    | 8     | 802   | 567   |
| Gm19.VB.51  | Gm19 | 36390000 | 36420000 | 30000    | 5   | W | W | W | W | W | W | I | 0   | 3     | 0     | 3     | 0     | 3     | 88    |
| Gm19.VB.52  | Gm19 | 36420000 | 36540000 | 120000   | 6   | W | B | W | B | W | W | I | 82  | 385   | 77    | 380   | 49    | 57    | 605   |
| Gm19.VB.53  | Gm19 | 36540000 | 36910000 | 370000   | 24  | W | B | W | B |   |   |   |     |       |       |       |       |       |       |

|             |      |          |          |        |    |   |   |   |   |   |   |   |     |      |      |      |      |      |      |
|-------------|------|----------|----------|--------|----|---|---|---|---|---|---|---|-----|------|------|------|------|------|------|
| Gm19.VB.54  | Gm19 | 36910000 | 37150000 | 240000 | 14 | W | W | W | W | W | W | I | 21  | 29   | 19   | 27   | 5    | 14   | 702  |
| Gm19.VB.55  | Gm19 | 37150000 | 37160000 | 10000  | 0  | W | B | W | B | W | W | I | 0   | 69   | 0    | 69   | 0    | 0    | 18   |
| Gm19.VB.56  | Gm19 | 37160000 | 37400000 | 240000 | 11 | W | W | W | W | W | W | I | 35  | 45   | 31   | 44   | 22   | 21   | 976  |
| Gm19.VB.57  | Gm19 | 37400000 | 37410000 | 10000  | 0  | W | B | W | B | W | W | I | 0   | 14   | 0    | 13   | 0    | 1    | 39   |
| Gm19.VB.58  | Gm19 | 37410000 | 37590000 | 180000 | 14 | W | B | W | B | W | H | I | 5   | 284  | 3    | 277  | 0    | 149  | 594  |
| Gm19.VB.59  | Gm19 | 37590000 | 37810000 | 220000 | 16 | W | W | W | W | W | H | I | 7   | 29   | 6    | 34   | 6    | 602  | 669  |
| Gm19.VB.60  | Gm19 | 37810000 | 38220000 | 410000 | 37 | W | B | W | B | W | H | I | 18  | 1063 | 21   | 1027 | 20   | 1175 | 1198 |
| Gm19.VB.61  | Gm19 | 38220000 | 38260000 | 40000  | 2  | W | W | W | W | W | H | I | 0   | 2    | 0    | 2    | 0    | 124  | 82   |
| Gm19.VB.62  | Gm19 | 38260000 | 38400000 | 140000 | 10 | W | W | W | W | W | W | I | 13  | 18   | 15   | 15   | 9    | 14   | 472  |
| Gm19.VB.63  | Gm19 | 38400000 | 38440000 | 40000  | 1  | W | W | W | W | W | H | I | 0   | 0    | 0    | 0    | 0    | 179  | 62   |
| Gm19.VB.64  | Gm19 | 38440000 | 38480000 | 40000  | 1  | W | B | W | B | W | H | I | 5   | 193  | 5    | 184  | 5    | 188  | 87   |
| Gm19.VB.65  | Gm19 | 38480000 | 38940000 | 460000 | 28 | W | W | W | W | W | H | I | 36  | 54   | 39   | 56   | 33   | 942  | 1217 |
| Gm19.VB.66  | Gm19 | 38940000 | 39080000 | 140000 | 11 | W | W | W | W | W | W | W | 12  | 20   | 12   | 20   | 5    | 18   | 13   |
| Gm19.VB.67  | Gm19 | 39080000 | 39100000 | 20000  | 1  | W | W | W | W | W | H | W | 0   | 3    | 0    | 3    | 0    | 64   | 0    |
| Gm19.VB.68  | Gm19 | 39100000 | 39290000 | 190000 | 14 | W | B | W | B | W | B | I | 6   | 842  | 6    | 829  | 5    | 753  | 555  |
| Gm19.VB.69  | Gm19 | 39290000 | 39610000 | 320000 | 22 | W | B | W | B | W | W | I | 21  | 1411 | 15   | 1339 | 16   | 35   | 1103 |
| Gm19.VB.70  | Gm19 | 39610000 | 40190000 | 580000 | 44 | W | B | W | B | W | H | I | 38  | 2397 | 43   | 2330 | 34   | 2332 | 1230 |
| Gm19.VB.71  | Gm19 | 40190000 | 40790000 | 600000 | 60 | W | B | S | B | S | S | I | 36  | 2037 | 2554 | 2001 | 2272 | 2344 | 1617 |
| Gm19.VB.72  | Gm19 | 40790000 | 40930000 | 140000 | 9  | W | W | W | W | W | W | I | 2   | 9    | 11   | 9    | 10   | 11   | 216  |
| Gm19.VB.73  | Gm19 | 40930000 | 41030000 | 100000 | 8  | W | W | S | W | S | S | I | 32  | 37   | 469  | 37   | 401  | 399  | 211  |
| Gm19.VB.74  | Gm19 | 41030000 | 41080000 | 50000  | 6  | W | B | B | B | B | B | I | 0   | 243  | 229  | 239  | 204  | 209  | 160  |
| Gm19.VB.75  | Gm19 | 41080000 | 41320000 | 240000 | 25 | W | W | S | W | D | S | I | 4   | 14   | 1126 | 14   | 208  | 1022 | 458  |
| Gm19.VB.76  | Gm19 | 41320000 | 41340000 | 20000  | 1  | W | B | S | B | B | S | I | 1   | 42   | 63   | 40   | 36   | 62   | 37   |
| Gm19.VB.77  | Gm19 | 41340000 | 41350000 | 10000  | 3  | W | B | S | B | W | S | I | 0   | 12   | 46   | 12   | 4    | 45   | 32   |
| Gm19.VB.78  | Gm19 | 41350000 | 41380000 | 30000  | 3  | W | B | W | B | W | W | W | 1   | 46   | 1    | 46   | 1    | 1    | 13   |
| Gm19.VB.79  | Gm19 | 41380000 | 41550000 | 170000 | 10 | W | W | W | W | W | W | I | 13  | 25   | 24   | 24   | 14   | 21   | 310  |
| Gm19.VB.80  | Gm19 | 41550000 | 41630000 | 80000  | 7  | W | W | S | W | W | H | I | 16  | 17   | 121  | 18   | 10   | 98   | 82   |
| Gm19.VB.81  | Gm19 | 41630000 | 41810000 | 180000 | 14 | W | B | S | B | S | S | I | 21  | 356  | 336  | 358  | 271  | 320  | 309  |
| Gm19.VB.82  | Gm19 | 41810000 | 41940000 | 130000 | 12 | W | B | S | B | W | S | I | 15  | 192  | 255  | 179  | 18   | 234  | 260  |
| Gm19.VB.83  | Gm19 | 41940000 | 42200000 | 260000 | 24 | W | B | S | G | D | S | I | 12  | 782  | 428  | 657  | 238  | 367  | 750  |
| Gm19.VB.84  | Gm19 | 42200000 | 42350000 | 150000 | 11 | W | B | S | S | W | S | I | 25  | 93   | 337  | 329  | 20   | 301  | 306  |
| Gm19.VB.85  | Gm19 | 42350000 | 42470000 | 120000 | 10 | W | B | S | S | D | S | I | 8   | 566  | 125  | 126  | 84   | 116  | 315  |
| Gm19.VB.86  | Gm19 | 42470000 | 42700000 | 230000 | 24 | W | B | W | W | W | W | I | 7   | 304  | 18   | 17   | 9    | 18   | 500  |
| Gm19.VB.87  | Gm19 | 42700000 | 42830000 | 130000 | 12 | W | B | S | S | D | W | I | 0   | 204  | 464  | 454  | 123  | 3    | 360  |
| Gm19.VB.88  | Gm19 | 42830000 | 42850000 | 20000  | 1  | W | B | S | S | W | W | I | 1   | 21   | 45   | 45   | 3    | 0    | 51   |
| Gm19.VB.89  | Gm19 | 42850000 | 42960000 | 110000 | 9  | W | W | S | S | W | W | I | 0   | 4    | 420  | 423  | 4    | 2    | 343  |
| Gm19.VB.90  | Gm19 | 42960000 | 43130000 | 170000 | 14 | W | B | B | B | B | W | I | 11  | 441  | 421  | 399  | 339  | 6    | 318  |
| Gm19.VB.91  | Gm19 | 43130000 | 43350000 | 220000 | 26 | W | W | W | W | W | W | I | 20  | 30   | 30   | 30   | 14   | 13   | 470  |
| Gm19.VB.92  | Gm19 | 43350000 | 43890000 | 540000 | 57 | W | B | W | W | W | W | I | 10  | 1349 | 43   | 40   | 33   | 26   | 975  |
| Gm19.VB.93  | Gm19 | 43890000 | 44040000 | 150000 | 13 | W | W | W | W | W | W | I | 0   | 3    | 2    | 2    | 1    | 2    | 199  |
| Gm19.VB.94  | Gm19 | 44040000 | 44270000 | 230000 | 20 | W | W | S | S | W | W | I | 6   | 20   | 1230 | 1186 | 16   | 23   | 512  |
| Gm19.VB.95  | Gm19 | 44270000 | 44280000 | 10000  | 0  | W | B | S | S | W | H | W | 2   | 8    | 13   | 12   | 0    | 18   | 3    |
| Gm19.VB.96  | Gm19 | 44280000 | 44580000 | 300000 | 35 | W | B | W | W | W | H | I | 0   | 1221 | 9    | 9    | 5    | 1240 | 738  |
| Gm19.VB.97  | Gm19 | 44580000 | 44960000 | 380000 | 35 | W | B | S | S | S | H | I | 4   | 765  | 854  | 830  | 808  | 854  | 777  |
| Gm19.VB.98  | Gm19 | 44960000 | 45800000 | 840000 | 90 | W | B | W | W | W | B | I | 29  | 3169 | 54   | 56   | 54   | 2997 | 2074 |
| Gm19.VB.99  | Gm19 | 45800000 | 46100000 | 300000 | 34 | W | B | S | S | S | B | I | 23  | 818  | 881  | 869  | 795  | 843  | 528  |
| Gm19.VB.100 | Gm19 | 46100000 | 46270000 | 170000 | 21 | W | W | W | W | W | H | I | 3   | 14   | 5    | 5    | 5    | 306  | 278  |
| Gm19.VB.101 | Gm19 | 46270000 | 46300000 | 30000  | 5  | W | B | W | W | W | H | I | 19  | 117  | 17   | 7    | 4    | 117  | 95   |
| Gm19.VB.102 | Gm19 | 46300000 | 46390000 | 90000  | 14 | W | W | W | W | W | H | I | 0   | 6    | 1    | 2    | 1    | 44   | 141  |
| Gm19.VB.103 | Gm19 | 46390000 | 46810000 | 420000 | 50 | W | W | W | W | W | W | I | 36  | 57   | 53   | 46   | 38   | 47   | 824  |
| Gm19.VB.104 | Gm19 | 46810000 | 46960000 | 150000 | 17 | W | B | W | W | W | W | I | 13  | 146  | 11   | 15   | 9    | 14   | 216  |
| Gm19.VB.105 | Gm19 | 46960000 | 46970000 | 10000  | 1  | W | W | W | W | W | W | I | 0   | 0    | 0    | 0    | 0    | 0    | 14   |
| Gm19.VB.106 | Gm19 | 46970000 | 47020000 | 50000  | 7  | W | W | S | S | S | W | I | 3   | 6    | 61   | 62   | 59   | 4    | 95   |
| Gm19.VB.107 | Gm19 | 47020000 | 47130000 | 110000 | 13 | W | W | S | S | S | S | I | 1   | 5    | 339  | 339  | 327  | 311  | 292  |
| Gm19.VB.108 | Gm19 | 47130000 | 47230000 | 100000 | 13 | W | W | S | S | D | W | I | 4   | 8    | 108  | 104  | 82   | 4    | 165  |
| Gm19.VB.109 | Gm19 | 47230000 | 47580000 | 350000 | 30 | W | W | S | S | S | S | I | 16  | 28   | 1288 | 1240 | 1149 | 1151 | 686  |
| Gm19.VB.110 | Gm19 | 47580000 | 48340000 | 760000 | 89 | W | B | B | B | B | H | I | 34  | 3145 | 3247 | 3136 | 2923 | 3066 | 1596 |
| Gm19.VB.111 | Gm19 | 48340000 | 48590000 | 250000 | 31 | W | W | W | W | W | W | I | 15  | 25   | 24   | 22   | 22   | 19   | 605  |
| Gm19.VB.112 | Gm19 | 48590000 | 48890000 | 300000 | 38 | W | W | W | W | W | H | I | 4   | 14   | 14   | 14   | 12   | 479  | 814  |
| Gm19.VB.113 | Gm19 | 48890000 | 49010000 | 120000 | 16 | W | W | W | W | W | W | I | 0   | 11   | 12   | 12   | 11   | 14   | 291  |
| Gm19.VB.114 | Gm19 | 49010000 | 49810000 | 800000 | 91 | W | B | B | B | B | H | I | 55  | 1373 | 1390 | 1345 | 1257 | 1462 | 1673 |
| Gm19.VB.115 | Gm19 | 49810000 | 50280000 | 470000 | 59 | W | W | W | W | W | W | I | 13  | 33   | 33   | 33   | 33   | 37   | 716  |
| Gm19.VB.116 | Gm19 | 50280000 | 50450000 | 170000 | 16 | W | B | B | B | B | B | I | 1   | 173  | 170  | 175  | 152  | 159  | 265  |
| Gm19.VB.117 | Gm19 | 50450000 | 50580000 | 130000 | 10 | W | W | W | W | W | W | I | 2   | 24   | 25   | 23   | 19   | 20   | 305  |
| Gm19.VB.118 | Gm19 | 50580000 | 50589441 | 9441   | 1  | W | W | W | W | W | W | I | 0   | 1    | 1    | 1    | 0    | 0    | 11   |
| Gm20.VB.1   | Gm20 | 0        | 60000    | 60000  | 5  | W | B | W | W | B | B | I | 10  | 58   | 9    | 10   | 56   | 56   | 44   |
| Gm20.VB.2   | Gm20 | 60000    | 170000   | 110000 | 8  | W | W | W | W | W | W | I | 9   | 21   | 9    | 9    | 21   | 21   | 208  |
| Gm20.VB.3   | Gm20 | 170000   | 360000   | 190000 | 18 | W | B | W | W | B | B | I | 5   | 662  | 6    | 8    | 617  | 622  | 444  |
| Gm20.VB.4   | Gm20 | 360000   | 480000   | 120000 | 8  | W | W | W | W | W | W | I | 0   | 9    | 1    | 0    | 6    | 10   | 196  |
| Gm20.VB.5   | Gm20 | 480000   | 530000   | 50000  | 5  | W | B | W | W | D | H | I | 1   | 222  | 0    | 3    | 111  | 174  | 153  |
| Gm20.VB.6   | Gm20 | 530000   | 540000   | 10000  | 2  | W | B | W | W | W | B | I | 0   | 17   | 0    | 0    | 1    | 17   | 9    |
| Gm20.VB.7   | Gm20 | 540000   | 640000   | 100000 | 8  | W | W | W | W | W | W | I | 5   | 10   | 5    | 3    | 3    | 9    | 195  |
| Gm20.VB.8   | Gm20 | 640000   | 690000   | 50000  | 8  | W | W | W | W | W | H | I | 0   | 6    | 4    | 4    | 4    | 104  | 117  |
| Gm20.VB.9   | Gm20 | 690000   | 730000   | 40000  | 4  | W | B | B | B | B | B | I | 0   | 135  | 134  | 133  | 130  | 130  | 71   |
| Gm20.VB.10  | Gm20 | 730000   | 740000   | 10000  | 0  | W | B | B | B | B | W | I | 0   | 8    | 8    | 8    | 9    | 4    | 15   |
| Gm20.VB.11  | Gm20 | 740000   | 840000   | 100000 | 13 | W | W | S | S | W | W | I | 0   | 5    | 434  | 427  | 3    | 3    | 289  |
| Gm20.VB.12  | Gm20 | 840000   | 1740000  | 900000 | 65 | W | B | S | B | D | H | I | 481 | 2899 | 2426 | 2912 | 1171 | 1597 | 2179 |
| Gm20.VB.13  | Gm20 | 1740000  | 2040000  | 300000 | 15 | W | B | S | B | D | W | I | 15  | 957  | 1319 | 951  | 468  | 18   | 846  |

|            |      |          |          |         |     |   |   |   |   |   |   |   |     |       |       |       |       |       |       |
|------------|------|----------|----------|---------|-----|---|---|---|---|---|---|---|-----|-------|-------|-------|-------|-------|-------|
| Gm20.VB.14 | Gm20 | 2040000  | 2200000  | 160000  | 16  | W | W | S | W | W | H | I | 3   | 56    | 248   | 54    | 20    | 207   | 414   |
| Gm20.VB.15 | Gm20 | 2200000  | 2470000  | 270000  | 14  | W | B | B | B | B | B | I | 19  | 1305  | 1303  | 1299  | 1252  | 1257  | 696   |
| Gm20.VB.16 | Gm20 | 2470000  | 2650000  | 180000  | 5   | W | W | W | W | W | W | I | 9   | 23    | 17    | 20    | 11    | 11    | 452   |
| Gm20.VB.17 | Gm20 | 2650000  | 2990000  | 340000  | 22  | W | B | W | B | W | B | I | 8   | 953   | 19    | 937   | 86    | 918   | 636   |
| Gm20.VB.18 | Gm20 | 2990000  | 3010000  | 20000   | 1   | W | W | S | W | W | W | I | 0   | 0     | 129   | 0     | 0     | 0     | 79    |
| Gm20.VB.19 | Gm20 | 3010000  | 3080000  | 70000   | 2   | W | B | S | B | D | B | I | 6   | 733   | 374   | 719   | 231   | 723   | 334   |
| Gm20.VB.20 | Gm20 | 3080000  | 3100000  | 20000   | 1   | W | W | S | W | W | W | I | 0   | 0     | 49    | 0     | 0     | 0     | 54    |
| Gm20.VB.21 | Gm20 | 3100000  | 3140000  | 40000   | 1   | W | B | W | B | W | B | I | 0   | 42    | 0     | 42    | 5     | 42    | 172   |
| Gm20.VB.22 | Gm20 | 3140000  | 11250000 | 8110000 | 121 | W | W | W | W | W | W | I | 415 | 791   | 674   | 739   | 493   | 779   | 18193 |
| Gm20.VB.23 | Gm20 | 11250000 | 11310000 | 60000   | 1   | W | W | W | G | W | W | I | 0   | 24    | 6     | 25    | 6     | 20    | 50    |
| Gm20.VB.24 | Gm20 | 11310000 | 14100000 | 2790000 | 38  | W | W | W | W | W | W | I | 196 | 389   | 257   | 366   | 234   | 378   | 6322  |
| Gm20.VB.25 | Gm20 | 14100000 | 15530000 | 1430000 | 16  | W | B | W | B | W | B | I | 41  | 7680  | 134   | 7589  | 357   | 7871  | 6164  |
| Gm20.VB.26 | Gm20 | 15530000 | 15640000 | 110000  | 3   | W | B | W | B | D | B | I | 7   | 738   | 12    | 724   | 55    | 715   | 414   |
| Gm20.VB.27 | Gm20 | 15640000 | 15800000 | 160000  | 4   | W | B | W | B | W | B | I | 1   | 583   | 10    | 571   | 33    | 543   | 388   |
| Gm20.VB.28 | Gm20 | 15800000 | 17340000 | 1540000 | 25  | W | W | W | W | W | W | I | 54  | 106   | 95    | 107   | 71    | 106   | 3305  |
| Gm20.VB.29 | Gm20 | 17340000 | 17820000 | 480000  | 3   | W | B | W | B | W | B | I | 16  | 1818  | 42    | 1786  | 94    | 1833  | 1459  |
| Gm20.VB.30 | Gm20 | 17820000 | 17980000 | 160000  | 0   | W | W | W | W | W | W | I | 18  | 17    | 18    | 15    | 7     | 20    | 178   |
| Gm20.VB.31 | Gm20 | 17980000 | 18050000 | 70000   | 0   | W | W | W | W | W | W | I | 0   | 17    | 9     | 7     | 5     | 3     | 190   |
| Gm20.VB.32 | Gm20 | 18050000 | 18060000 | 10000   | 0   | W | W | W | G | W | W | I | 0   | 0     | 1     | 8     | 1     | 4     | 40    |
| Gm20.VB.33 | Gm20 | 18060000 | 18390000 | 330000  | 3   | W | B | W | B | W | B | I | 36  | 1146  | 56    | 1091  | 80    | 1115  | 1194  |
| Gm20.VB.34 | Gm20 | 18390000 | 22460000 | 4070000 | 30  | W | W | W | W | W | W | I | 141 | 356   | 262   | 333   | 196   | 367   | 5125  |
| Gm20.VB.35 | Gm20 | 22460000 | 22470000 | 10000   | 0   | W | B | W | G | W | W | I | 0   | 10    | 4     | 5     | 3     | 3     | 24    |
| Gm20.VB.36 | Gm20 | 22470000 | 23170000 | 700000  | 8   | W | B | W | B | W | B | I | 17  | 373   | 63    | 371   | 74    | 372   | 1768  |
| Gm20.VB.37 | Gm20 | 23170000 | 23470000 | 300000  | 5   | W | W | W | W | W | W | I | 2   | 17    | 21    | 19    | 18    | 20    | 1143  |
| Gm20.VB.38 | Gm20 | 23470000 | 23590000 | 120000  | 1   | W | B | B | B | B | B | I | 0   | 386   | 377   | 382   | 378   | 392   | 69    |
| Gm20.VB.39 | Gm20 | 23590000 | 23700000 | 110000  | 4   | W | W | W | W | W | W | I | 5   | 31    | 33    | 27    | 26    | 31    | 59    |
| Gm20.VB.40 | Gm20 | 23700000 | 23750000 | 50000   | 1   | W | B | B | B | B | B | I | 1   | 41    | 43    | 44    | 41    | 45    | 385   |
| Gm20.VB.41 | Gm20 | 23750000 | 24350000 | 600000  | 11  | W | W | W | W | W | W | I | 16  | 62    | 64    | 59    | 47    | 55    | 367   |
| Gm20.VB.42 | Gm20 | 24350000 | 26810000 | 2460000 | 30  | W | B | B | B | B | B | I | 124 | 11829 | 11989 | 11729 | 11948 | 12035 | 9558  |
| Gm20.VB.43 | Gm20 | 26810000 | 30180000 | 3370000 | 46  | W | W | W | W | W | W | I | 151 | 359   | 355   | 334   | 260   | 352   | 13276 |
| Gm20.VB.44 | Gm20 | 30180000 | 30510000 | 330000  | 7   | W | B | B | B | B | B | I | 1   | 1433  | 1445  | 1416  | 1407  | 1439  | 1180  |
| Gm20.VB.45 | Gm20 | 30510000 | 32580000 | 2070000 | 67  | W | W | W | W | W | W | I | 123 | 243   | 128   | 127   | 218   | 231   | 5196  |
| Gm20.VB.46 | Gm20 | 32580000 | 32710000 | 130000  | 13  | W | B | W | W | W | B | I | 9   | 599   | 9     | 9     | 9     | 575   | 463   |
| Gm20.VB.47 | Gm20 | 32710000 | 33040000 | 330000  | 22  | W | W | W | W | W | W | I | 12  | 27    | 13    | 11    | 10    | 24    | 1277  |
| Gm20.VB.48 | Gm20 | 33040000 | 33070000 | 30000   | 6   | W | B | W | W | W | W | I | 0   | 65    | 0     | 0     | 0     | 3     | 112   |
| Gm20.VB.49 | Gm20 | 33070000 | 34200000 | 1130000 | 104 | W | B | W | W | W | H | I | 41  | 4619  | 46    | 41    | 36    | 5355  | 3695  |
| Gm20.VB.50 | Gm20 | 34200000 | 34370000 | 170000  | 16  | W | B | S | S | S | H | I | 19  | 827   | 844   | 807   | 737   | 697   | 476   |
| Gm20.VB.51 | Gm20 | 34370000 | 34530000 | 160000  | 15  | W | B | B | B | B | W | I | 10  | 780   | 782   | 768   | 716   | 14    | 421   |
| Gm20.VB.52 | Gm20 | 34530000 | 34580000 | 50000   | 3   | W | B | W | W | W | H | I | 1   | 193   | 1     | 1     | 0     | 91    | 156   |
| Gm20.VB.53 | Gm20 | 34580000 | 34630000 | 50000   | 4   | W | W | W | W | W | H | I | 10  | 13    | 12    | 13    | 13    | 61    | 79    |
| Gm20.VB.54 | Gm20 | 34630000 | 34760000 | 130000  | 7   | W | W | W | W | W | W | I | 7   | 26    | 23    | 17    | 12    | 13    | 555   |
| Gm20.VB.55 | Gm20 | 34760000 | 34830000 | 70000   | 5   | W | W | W | W | W | H | I | 14  | 14    | 11    | 11    | 15    | 99    | 171   |
| Gm20.VB.56 | Gm20 | 34830000 | 35050000 | 220000  | 17  | W | B | W | W | W | H | I | 41  | 977   | 40    | 38    | 39    | 435   | 853   |
| Gm20.VB.57 | Gm20 | 35050000 | 35240000 | 190000  | 14  | W | W | W | W | W | H | I | 37  | 40    | 37    | 35    | 28    | 128   | 934   |
| Gm20.VB.58 | Gm20 | 35240000 | 35330000 | 90000   | 10  | W | B | W | W | W | H | I | 4   | 520   | 4     | 4     | 4     | 225   | 205   |
| Gm20.VB.59 | Gm20 | 35330000 | 35340000 | 10000   | 2   | W | B | S | W | S | W | W | 0   | 101   | 6     | 4     | 6     | 1     | 4     |
| Gm20.VB.60 | Gm20 | 35340000 | 35680000 | 340000  | 31  | W | B | B | B | B | H | I | 29  | 1699  | 1708  | 1647  | 1460  | 997   | 1054  |
| Gm20.VB.61 | Gm20 | 35680000 | 35940000 | 260000  | 24  | W | B | W | W | W | W | I | 19  | 1183  | 30    | 25    | 20    | 18    | 920   |
| Gm20.VB.62 | Gm20 | 35940000 | 36170000 | 230000  | 31  | W | B | W | W | W | H | I | 3   | 632   | 9     | 8     | 8     | 456   | 659   |
| Gm20.VB.63 | Gm20 | 36170000 | 36270000 | 100000  | 12  | W | W | W | W | W | W | I | 2   | 4     | 2     | 2     | 2     | 5     | 274   |
| Gm20.VB.64 | Gm20 | 36270000 | 36290000 | 20000   | 3   | W | B | W | W | W | B | I | 0   | 67    | 0     | 0     | 0     | 65    | 43    |
| Gm20.VB.65 | Gm20 | 36290000 | 36400000 | 110000  | 8   | W | W | W | W | W | W | I | 2   | 12    | 5     | 3     | 3     | 10    | 460   |
| Gm20.VB.66 | Gm20 | 36400000 | 36470000 | 70000   | 6   | W | W | W | W | W | W | I | 1   | 6     | 1     | 1     | 1     | 26    | 363   |
| Gm20.VB.67 | Gm20 | 36470000 | 36600000 | 130000  | 14  | W | B | W | W | W | H | I | 13  | 415   | 14    | 13    | 7     | 377   | 461   |
| Gm20.VB.68 | Gm20 | 36600000 | 36760000 | 160000  | 13  | W | W | W | W | W | H | I | 27  | 28    | 29    | 24    | 32    | 110   | 671   |
| Gm20.VB.69 | Gm20 | 36760000 | 36900000 | 140000  | 19  | W | W | W | W | W | W | I | 13  | 18    | 11    | 12    | 11    | 15    | 485   |
| Gm20.VB.70 | Gm20 | 36900000 | 36950000 | 50000   | 6   | W | B | W | W | W | W | I | 1   | 126   | 1     | 1     | 1     | 3     | 97    |
| Gm20.VB.71 | Gm20 | 36950000 | 37120000 | 170000  | 16  | W | W | W | W | W | W | I | 10  | 20    | 23    | 17    | 11    | 10    | 380   |
| Gm20.VB.72 | Gm20 | 37120000 | 37150000 | 30000   | 3   | W | B | W | W | W | W | I | 0   | 61    | 1     | 1     | 1     | 0     | 62    |
| Gm20.VB.73 | Gm20 | 37150000 | 37650000 | 500000  | 39  | W | W | W | W | W | W | I | 47  | 58    | 66    | 65    | 46    | 144   | 1287  |
| Gm20.VB.74 | Gm20 | 37650000 | 37670000 | 20000   | 1   | W | W | W | W | W | H | I | 0   | 1     | 1     | 1     | 1     | 31    | 96    |
| Gm20.VB.75 | Gm20 | 37670000 | 37890000 | 220000  | 21  | W | W | W | W | W | W | I | 13  | 21    | 22    | 23    | 19    | 22    | 566   |
| Gm20.VB.76 | Gm20 | 37890000 | 37990000 | 100000  | 6   | W | W | S | S | S | W | I | 15  | 12    | 542   | 541   | 462   | 12    | 263   |
| Gm20.VB.77 | Gm20 | 37990000 | 38050000 | 60000   | 7   | W | B | S | S | S | W | I | 9   | 251   | 328   | 297   | 271   | 10    | 206   |
| Gm20.VB.78 | Gm20 | 38050000 | 38300000 | 250000  | 22  | W | B | W | W | W | W | I | 27  | 1603  | 33    | 29    | 27    | 44    | 452   |
| Gm20.VB.79 | Gm20 | 38300000 | 38430000 | 130000  | 12  | W | B | S | S | S | W | I | 10  | 606   | 603   | 555   | 493   | 8     | 231   |
| Gm20.VB.80 | Gm20 | 38430000 | 38630000 | 200000  | 23  | W | B | W | W | W | W | I | 6   | 709   | 5     | 7     | 4     | 12    | 318   |
| Gm20.VB.81 | Gm20 | 38630000 | 38700000 | 70000   | 5   | W | B | W | W | W | H | I | 6   | 258   | 7     | 6     | 5     | 71    | 88    |
| Gm20.VB.82 | Gm20 | 38700000 | 38840000 | 140000  | 18  | W | B | W | W | W | W | I | 12  | 435   | 14    | 13    | 5     | 11    | 200   |
| Gm20.VB.83 | Gm20 | 38840000 | 39370000 | 530000  | 47  | W | W | W | W | W | W | I | 50  | 77    | 51    | 51    | 34    | 51    | 1008  |
| Gm20.VB.84 | Gm20 | 39370000 | 39420000 | 50000   | 2   | W | B | W | W | W | W | I | 0   | 164   | 0     | 0     | 0     | 2     | 145   |
| Gm20.VB.85 | Gm20 | 39420000 | 39710000 | 290000  | 28  | W | B | W | W | W | B | I | 29  | 1103  | 28    | 28    | 24    | 1015  | 522   |
| Gm20.VB.86 | Gm20 | 39710000 | 39910000 | 200000  | 20  | W | W | W | W | W | W | I | 29  | 29    | 33    | 31    | 34    | 32    | 382   |
| Gm20.VB.87 | Gm20 | 39910000 | 39930000 | 20000   | 0   | W | B | W | B | W | B | I | 6   | 71    | 6     | 71    | 2     | 66    | 18    |
| Gm20.VB.88 | Gm20 | 39930000 | 40080000 | 150000  | 13  | W | W | W | W | W | W | I | 10  | 21    | 10    | 23    | 10    | 21    | 286   |
| Gm20.VB.89 | Gm20 | 40080000 | 40490000 | 410000  | 39  | W | B | W | B | W | H | I | 24  | 1139  | 24    | 1106  | 20    | 1184  | 983   |
| Gm20.VB.90 | Gm20 | 40490000 | 40690000 | 200000  | 13  | W | W | W | W | W | H | I | 18  | 18    | 18    | 17    | 16    | 284   | 364   |
| Gm20.VB.91 | Gm20 | 40690000 | 41270000 | 580000  | 39  | W | W | W |   |   |   |   |     |       |       |       |       |       |       |



|             |      |          |          |         |     |   |   |   |   |   |   |   |    |      |    |      |      |      |      |
|-------------|------|----------|----------|---------|-----|---|---|---|---|---|---|---|----|------|----|------|------|------|------|
| Gm20.VB.92  | Gm20 | 41270000 | 41520000 | 250000  | 22  | W | W | W | W | W | H | I | 21 | 22   | 21 | 19   | 12   | 492  | 513  |
| Gm20.VB.93  | Gm20 | 41520000 | 41630000 | 110000  | 8   | W | W | W | W | W | W | W | 0  | 0    | 1  | 0    | 1    | 6    | 40   |
| Gm20.VB.94  | Gm20 | 41630000 | 42080000 | 450000  | 34  | W | W | W | W | W | H | I | 39 | 39   | 45 | 48   | 34   | 764  | 1218 |
| Gm20.VB.95  | Gm20 | 42080000 | 42930000 | 850000  | 91  | W | W | W | W | W | W | I | 28 | 43   | 28 | 42   | 20   | 38   | 1808 |
| Gm20.VB.96  | Gm20 | 42930000 | 42940000 | 10000   | 0   | W | W | W | W | W | H | I | 1  | 5    | 1  | 5    | 1    | 6    | 19   |
| Gm20.VB.97  | Gm20 | 42940000 | 43230000 | 290000  | 31  | W | B | W | B | W | B | I | 35 | 814  | 40 | 803  | 31   | 734  | 512  |
| Gm20.VB.98  | Gm20 | 43230000 | 43430000 | 200000  | 21  | W | W | W | W | W | W | I | 17 | 25   | 18 | 24   | 17   | 26   | 260  |
| Gm20.VB.99  | Gm20 | 43430000 | 43480000 | 50000   | 5   | W | B | W | B | W | W | I | 19 | 285  | 21 | 258  | 18   | 25   | 115  |
| Gm20.VB.100 | Gm20 | 43480000 | 43590000 | 110000  | 9   | W | B | W | B | B | W | I | 34 | 555  | 38 | 540  | 526  | 33   | 297  |
| Gm20.VB.101 | Gm20 | 43590000 | 44710000 | 1120000 | 114 | W | B | W | B | B | H | I | 46 | 4404 | 48 | 4351 | 4052 | 3571 | 2518 |
| Gm20.VB.102 | Gm20 | 44710000 | 44850000 | 140000  | 16  | W | B | W | B | B | W | I | 7  | 447  | 5  | 452  | 419  | 7    | 395  |
| Gm20.VB.103 | Gm20 | 44850000 | 44870000 | 20000   | 2   | W | B | W | B | B | B | I | 0  | 147  | 0  | 138  | 131  | 142  | 109  |
| Gm20.VB.104 | Gm20 | 44870000 | 45360000 | 490000  | 40  | W | W | W | W | W | W | I | 13 | 27   | 13 | 34   | 24   | 14   | 905  |
| Gm20.VB.105 | Gm20 | 45360000 | 45450000 | 90000   | 10  | W | B | W | B | B | W | I | 3  | 153  | 3  | 151  | 129  | 5    | 193  |
| Gm20.VB.106 | Gm20 | 45450000 | 45820000 | 370000  | 47  | W | B | W | B | B | B | I | 14 | 939  | 13 | 931  | 884  | 858  | 699  |
| Gm20.VB.107 | Gm20 | 45820000 | 45970000 | 150000  | 15  | W | B | W | B | B | W | I | 5  | 586  | 5  | 583  | 564  | 9    | 348  |
| Gm20.VB.108 | Gm20 | 45970000 | 46210000 | 240000  | 29  | W | W | W | W | W | W | I | 19 | 22   | 20 | 23   | 18   | 15   | 365  |
| Gm20.VB.109 | Gm20 | 46210000 | 46540000 | 330000  | 33  | W | B | W | B | B | W | I | 15 | 739  | 15 | 737  | 675  | 16   | 637  |
| Gm20.VB.110 | Gm20 | 46540000 | 46770000 | 230000  | 24  | W | W | W | W | W | W | I | 20 | 29   | 23 | 26   | 24   | 23   | 294  |
| Gm20.VB.111 | Gm20 | 46770000 | 46773167 | 3167    | 0   | W | W | W | W | W | W | I | 0  | 0    | 0  | 0    | 0    | 0    | 3    |
