# Supplementary material for: Variation block-based genomics method for crop plants
Source: PubMed Central journal article supplement (PMC4229737; doi:10.1186/1471-2164-15-477), 2014-06-15
Supplement: 1471-2164-15-477-S13.pdf [file 1471-2164-15-477-S13.pdf]

**Table S4 - Hilum colors and HD8.386 indel marker analysis results of 86 soybean cultivars.**

The genotype of each *I* and putative *HC* loci were determined by indel marker analysis.

| No. | Cultivar               | Hilum color     | HD8.386  | Genotype    | No. | Cultivar    | Hilum color     | HD8.386  | Genotype    |
|-----|------------------------|-----------------|----------|-------------|-----|-------------|-----------------|----------|-------------|
| 1   | HwangKeum ( <i>I</i> ) | Yellow          | -        | $i^i + I^h$ | 44  | JangYeop    | Yellow          | -        | $i^i + I^h$ |
| 2   | Williams 82 ( $i^i$ )  | Black           | Deletion | $i^i + i^h$ | 45  | JinMi       | Yellow          | -        | $i^i + I^h$ |
| 3   | Enrei ( <i>I</i> )     | Yellow          | -        | $i^i + I^h$ | 46  | JinPum      | Yellow          | -        | $i^i + I^h$ |
| 4   | AlChan                 | Brown           | Deletion | $i^i + i^h$ | 47  | JinPum 2    | Yellow          | -        | $i^i + I^h$ |
| 5   | AnPyeong               | Yellow          | -        | $i^i + I^h$ | 48  | JoNam       | Yellow          | -        | $i^i + I^h$ |
| 6   | BaekCheon              | Imperfect black | Deletion | $i^i + i^h$ | 49  | KeunOl      | Yellow          | -        | $i^i + I^h$ |
| 7   | BaekUn                 | Brown           | Deletion | $i^i + i^h$ | 50  | ManRi       | Yellow          | -        | $i^i + I^h$ |
| 8   | BangSa                 | Brown           | Deletion | $i^i + i^h$ | 51  | ManSu       | Yellow          | -        | $i^i + I^h$ |
| 9   | BoGwang                | Yellow          | -        | $i^i + I^h$ | 52  | MilYang     | Imperfect black | Deletion | $i^i + i^h$ |
| 10  | BoSeok                 | Brown           | Deletion | $i^i + i^h$ | 53  | MuHan       | Imperfect black | Deletion | $i^i + i^h$ |
| 11  | BuGwang                | Brown           | Deletion | $i^i + i^h$ | 54  | MyeongJu    | Imperfect black | Deletion | $i^i + i^h$ |
| 12  | ChengDu 1              | Black           | Deletion | $i^i + i^h$ | 55  | NamHae      | Imperfect black | Deletion | $i^i + i^h$ |
| 13  | DaChae                 | Imperfect black | Deletion | $i^i + i^h$ | 56  | NamPoong    | Buff            | Deletion | $i^i + i^h$ |
| 14  | DaeHwang               | Yellow          | -        | $i^i + I^h$ | 57  | PalDal      | Black           | Deletion | $i^i + i^h$ |
| 15  | DaeMang                | Imperfect black | Deletion | $i^i + i^h$ | 58  | PalDo       | Imperfect black | Deletion | $i^i + i^h$ |
| 16  | DaeMang 2              | Imperfect black | Deletion | $i^i + i^h$ | 59  | PoongSan    | Yellow          | -        | $i^i + I^h$ |
| 17  | DaePoong               | Brown           | Deletion | $i^i + i^h$ | 60  | PoongWon    | Buff            | Deletion | $i^i + i^h$ |
| 18  | DaeWon                 | Yellow          | -        | $i^i + I^h$ | 61  | SamNam      | Buff            | Deletion | $i^i + i^h$ |
| 19  | DaeYang                | Yellow          | -        | $i^i + I^h$ | 62  | SangWon     | Yellow          | -        | $i^i + I^h$ |
| 20  | DaGi                   | Brown           | Deletion | $i^i + i^h$ | 63  | SeaByeol    | Brown           | Deletion | $i^i + i^h$ |
| 21  | DaJang                 | Imperfect black | Deletion | $i^i + i^h$ | 64  | SeaOl       | Buff            | Deletion | $i^i + i^h$ |
| 22  | DaJin                  | Yellow          | -        | $i^i + I^h$ | 65  | SeokYang    | Brown           | Deletion | $i^i + i^h$ |
| 23  | DanBack                | Brown           | Deletion | $i^i + i^h$ | 66  | SeoNam      | Imperfect black | Deletion | $i^i + i^h$ |
| 24  | DanMi                  | Yellow          | -        | $i^i + I^h$ | 67  | SeonYu      | Yellow          | -        | $i^i + I^h$ |
| 25  | DanWon                 | Imperfect black | Deletion | $i^i + i^h$ | 68  | SinGang     | Brown           | Deletion | $i^i + i^h$ |
| 26  | DeokKyu                | Imperfect black | Deletion | $i^i + i^h$ | 69  | SinGi       | Buff            | Deletion | $i^i + i^h$ |
| 27  | DoReMi                 | Imperfect black | Deletion | $i^i + i^h$ | 70  | SinHwa      | Buff            | Deletion | $i^i + i^h$ |
| 28  | DuYu                   | Black           | Deletion | $i^i + i^h$ | 71  | SinPalDal   | Imperfect black | Deletion | $i^i + i^h$ |
| 29  | EunHa                  | Imperfect black | Deletion | $i^i + i^h$ | 72  | SinPalDal 2 | Black           | Deletion | $i^i + i^h$ |
| 30  | GeumGang               | Imperfect black | Deletion | $i^i + i^h$ | 73  | SinRok      | Yellow          | -        | $i^i + I^h$ |
| 31  | GwangAn                | Imperfect black | Deletion | $i^i + i^h$ | 74  | SoBack      | Yellow          | -        | $i^i + I^h$ |
| 32  | GwangGyo               | Imperfect black | Deletion | $i^i + i^h$ | 75  | SoDam       | Yellow          | -        | $i^i + I^h$ |
| 33  | HanNam                 | Yellow          | -        | $i^i + I^h$ | 76  | SoGang      | Buff            | Deletion | $i^i + i^h$ |
| 34  | HoJang                 | Yellow          | -        | $i^i + I^h$ | 77  | SoHo        | Brown           | Deletion | $i^i + i^h$ |
| 35  | HoSeo                  | Brown           | Deletion | $i^i + i^h$ | 78  | SoHwang     | Yellow          | -        | $i^i + I^h$ |
| 36  | HwaEom                 | Yellow          | -        | $i^i + I^h$ | 79  | SoJin       | Buff            | Deletion | $i^i + i^h$ |
| 37  | HwaSeong               | Buff            | Deletion | $i^i + i^h$ | 80  | SoMyeong    | Buff            | Deletion | $i^i + i^h$ |
| 38  | IkSan                  | Imperfect black | Deletion | $i^i + i^h$ | 81  | SongHak     | Yellow          | -        | $i^i + I^h$ |
| 39  | ILMi                   | Brown           | Deletion | $i^i + i^h$ | 82  | SoRok       | Black           | Deletion | $i^i + i^h$ |
| 40  | JangGi                 | Buff            | Deletion | $i^i + i^h$ | 83  | SoWon       | Buff            | Deletion | $i^i + i^h$ |
| 41  | JangGyeong             | Imperfect black | Deletion | $i^i + i^h$ | 84  | TaeGwang    | Yellow          | -        | $i^i + I^h$ |
| 42  | JangSu                 | Imperfect black | Deletion | $i^i + i^h$ | 85  | WonGwang    | Imperfect black | Deletion | $i^i + i^h$ |
| 43  | JangWon                | Yellow          | -        | $i^i + I^h$ | 86  | WonHwang    | Buff            | Deletion | $i^i + i^h$ |
